# Supplementary material for: Virological response and resistance among HIV-infected children receiving long-term antiretroviral therapy without virological monitoring in Uganda and Zimbabwe: Observational analyses within the randomised ARROW trial
Source: PLoS Med. 2017 Nov 14;14(11):e1002432. doi: 10.1371/journal.pmed.1002432 (PMC5685482; doi:10.1371/journal.pmed.1002432)
Supplement: S1 Table — Abbreviation: VL, viral load. (XLS) [file pmed.1002432.s001.xls]

## Sheet: Sheet1
Child	Week	Sign of viral load	Viral load (copies/ml)	Classification	Gender	Centre	Age at ART initiation (years)	Height-for-age at ART initiation (average of screening and enrolment values)	Weight-for-age at ART initiation (average of screening and enrolment values)	CD4% at ART initiation (average of screening and enrolment values)	WHO stage at ART initiation	Monitoring	ART strategy	Initial NNRTI	Previous single dose nevirapine to mother and/or child for prevention of transmi	Primary carer at ART initiation
1	0	=	39450	Baseline	Male	C	15	-0.51	-0.929596	2	1/2	CD4 monitoring	Arm C (long-term ZDV, 3NRTI after week-36)	Efavirenz	No	Other
1	12	<	80	Viral load response	Male	C	15	-0.51	-0.929596	2	1/2	CD4 monitoring	Arm C (long-term ZDV, 3NRTI after week-36)	Efavirenz	No	Other
2	0	=	2020	Baseline	Female	C	2	-0.04	0.619422	15.5	1/2	CD4 monitoring	Arm A (3TC/ABC/NNRTI throughout)	Efavirenz	Yes	Mother
2	4	=	302	Viral load response	Female	C	2	-0.04	0.619422	15.5	1/2	CD4 monitoring	Arm A (3TC/ABC/NNRTI throughout)	Efavirenz	Yes	Mother
2	24	<	80	Viral load response	Female	C	2	-0.04	0.619422	15.5	1/2	CD4 monitoring	Arm A (3TC/ABC/NNRTI throughout)	Efavirenz	Yes	Mother
2	48	<	80	Viral load response	Female	C	2	-0.04	0.619422	15.5	1/2	CD4 monitoring	Arm A (3TC/ABC/NNRTI throughout)	Efavirenz	Yes	Mother
2	60	<	80	Viral load response	Female	C	2	-0.04	0.619422	15.5	1/2	CD4 monitoring	Arm A (3TC/ABC/NNRTI throughout)	Efavirenz	Yes	Mother
2	72	<	80	Viral load response	Female	C	2	-0.04	0.619422	15.5	1/2	CD4 monitoring	Arm A (3TC/ABC/NNRTI throughout)	Efavirenz	Yes	Mother
2	96	<	80	Viral load response	Female	C	2	-0.04	0.619422	15.5	1/2	CD4 monitoring	Arm A (3TC/ABC/NNRTI throughout)	Efavirenz	Yes	Mother
2	108	<	80	Viral load response	Female	C	2	-0.04	0.619422	15.5	1/2	CD4 monitoring	Arm A (3TC/ABC/NNRTI throughout)	Efavirenz	Yes	Mother
2	120	<	80	Viral load response	Female	C	2	-0.04	0.619422	15.5	1/2	CD4 monitoring	Arm A (3TC/ABC/NNRTI throughout)	Efavirenz	Yes	Mother
2	144	<	80	Viral load response	Female	C	2	-0.04	0.619422	15.5	1/2	CD4 monitoring	Arm A (3TC/ABC/NNRTI throughout)	Efavirenz	Yes	Mother
2	156	<	80	Viral load response	Female	C	2	-0.04	0.619422	15.5	1/2	CD4 monitoring	Arm A (3TC/ABC/NNRTI throughout)	Efavirenz	Yes	Mother
2	168	<	80	Viral load response	Female	C	2	-0.04	0.619422	15.5	1/2	CD4 monitoring	Arm A (3TC/ABC/NNRTI throughout)	Efavirenz	Yes	Mother
2	192	<	80	Viral load response	Female	C	2	-0.04	0.619422	15.5	1/2	CD4 monitoring	Arm A (3TC/ABC/NNRTI throughout)	Efavirenz	Yes	Mother
2	204	<	80	Viral load response	Female	C	2	-0.04	0.619422	15.5	1/2	CD4 monitoring	Arm A (3TC/ABC/NNRTI throughout)	Efavirenz	Yes	Mother
3	0	=	382297	Baseline	Male	A	1	-6.89	-5.15758	8	3/4	No CD4 monitoring	Arm B (36 weeks ZDV)	Nevirapine	Yes	Mother
3	4	=	6001	Viral load response	Male	A	1	-6.89	-5.15758	8	3/4	No CD4 monitoring	Arm B (36 weeks ZDV)	Nevirapine	Yes	Mother
3	24	=	586	Viral load response	Male	A	1	-6.89	-5.15758	8	3/4	No CD4 monitoring	Arm B (36 weeks ZDV)	Nevirapine	Yes	Mother
4	0	=	110134	Baseline	Female	D	1	-3.455	-2.71985	4	1/2	No CD4 monitoring	Arm C (long-term ZDV, 3NRTI after week-36)	Nevirapine	No	Mother
4	4	=	13214	Viral load response	Female	D	1	-3.455	-2.71985	4	1/2	No CD4 monitoring	Arm C (long-term ZDV, 3NRTI after week-36)	Nevirapine	No	Mother
5	0	=	41029	Baseline	Male	A	3	-4.57	-4.18576	4.5	3/4	No CD4 monitoring	Arm A (3TC/ABC/NNRTI throughout)	Nevirapine	No	Mother
5	4	=	3585	Viral load response	Male	A	3	-4.57	-4.18576	4.5	3/4	No CD4 monitoring	Arm A (3TC/ABC/NNRTI throughout)	Nevirapine	No	Mother
5	24	<	80	Viral load response	Male	A	3	-4.57	-4.18576	4.5	3/4	No CD4 monitoring	Arm A (3TC/ABC/NNRTI throughout)	Nevirapine	No	Mother
5	60	<	80	Viral load response	Male	A	3	-4.57	-4.18576	4.5	3/4	No CD4 monitoring	Arm A (3TC/ABC/NNRTI throughout)	Nevirapine	No	Mother
5	72	<	80	Viral load response	Male	A	3	-4.57	-4.18576	4.5	3/4	No CD4 monitoring	Arm A (3TC/ABC/NNRTI throughout)	Nevirapine	No	Mother
5	96	<	80	Viral load response	Male	A	3	-4.57	-4.18576	4.5	3/4	No CD4 monitoring	Arm A (3TC/ABC/NNRTI throughout)	Nevirapine	No	Mother
5	120	<	80	Viral load response	Male	A	3	-4.57	-4.18576	4.5	3/4	No CD4 monitoring	Arm A (3TC/ABC/NNRTI throughout)	Nevirapine	No	Mother
5	144	<	80	Viral load response	Male	A	3	-4.57	-4.18576	4.5	3/4	No CD4 monitoring	Arm A (3TC/ABC/NNRTI throughout)	Nevirapine	No	Mother
5	168	<	80	Viral load response	Male	A	3	-4.57	-4.18576	4.5	3/4	No CD4 monitoring	Arm A (3TC/ABC/NNRTI throughout)	Nevirapine	No	Mother
5	192	<	80	Viral load response	Male	A	3	-4.57	-4.18576	4.5	3/4	No CD4 monitoring	Arm A (3TC/ABC/NNRTI throughout)	Nevirapine	No	Mother
6	0	=	76369	Baseline	Male	A	10	-2.25	-2.22415	0.75	3/4	CD4 monitoring	Arm C (long-term ZDV, 3NRTI after week-36)	Efavirenz	No	Mother
6	4	<	80	Viral load response	Male	A	10	-2.25	-2.22415	0.75	3/4	CD4 monitoring	Arm C (long-term ZDV, 3NRTI after week-36)	Efavirenz	No	Mother
6	12	<	80	Viral load response	Male	A	10	-2.25	-2.22415	0.75	3/4	CD4 monitoring	Arm C (long-term ZDV, 3NRTI after week-36)	Efavirenz	No	Mother
7	0	=	326192	Baseline	Male	B	5	-0.98	-1.4484	24.5	3/4	No CD4 monitoring	Arm B (36 weeks ZDV)	Efavirenz	No	Mother
7	4	=	1232	Viral load response	Male	B	5	-0.98	-1.4484	24.5	3/4	No CD4 monitoring	Arm B (36 weeks ZDV)	Efavirenz	No	Mother
7	24	<	80	Viral load response	Male	B	5	-0.98	-1.4484	24.5	3/4	No CD4 monitoring	Arm B (36 weeks ZDV)	Efavirenz	No	Mother
7	36	<	80	Viral load response	Male	B	5	-0.98	-1.4484	24.5	3/4	No CD4 monitoring	Arm B (36 weeks ZDV)	Efavirenz	No	Mother
7	48	<	80	Viral load response	Male	B	5	-0.98	-1.4484	24.5	3/4	No CD4 monitoring	Arm B (36 weeks ZDV)	Efavirenz	No	Mother
7	60	<	80	Viral load response	Male	B	5	-0.98	-1.4484	24.5	3/4	No CD4 monitoring	Arm B (36 weeks ZDV)	Efavirenz	No	Mother
7	72	<	80	Viral load response	Male	B	5	-0.98	-1.4484	24.5	3/4	No CD4 monitoring	Arm B (36 weeks ZDV)	Efavirenz	No	Mother
7	96	<	80	Viral load response	Male	B	5	-0.98	-1.4484	24.5	3/4	No CD4 monitoring	Arm B (36 weeks ZDV)	Efavirenz	No	Mother
7	120	<	80	Viral load response	Male	B	5	-0.98	-1.4484	24.5	3/4	No CD4 monitoring	Arm B (36 weeks ZDV)	Efavirenz	No	Mother
7	144	<	80	Viral load response	Male	B	5	-0.98	-1.4484	24.5	3/4	No CD4 monitoring	Arm B (36 weeks ZDV)	Efavirenz	No	Mother
7	156	<	80	Viral load response	Male	B	5	-0.98	-1.4484	24.5	3/4	No CD4 monitoring	Arm B (36 weeks ZDV)	Efavirenz	No	Mother
7	168	<	80	Viral load response	Male	B	5	-0.98	-1.4484	24.5	3/4	No CD4 monitoring	Arm B (36 weeks ZDV)	Efavirenz	No	Mother
7	192	<	80	Viral load response	Male	B	5	-0.98	-1.4484	24.5	3/4	No CD4 monitoring	Arm B (36 weeks ZDV)	Efavirenz	No	Mother
8	0	=	36464	Baseline	Female	B	8	-1.14	-1.51814	24.5	3/4	CD4 monitoring	Arm A (3TC/ABC/NNRTI throughout)	Nevirapine	No	Mother
8	4	=	288	Viral load response	Female	B	8	-1.14	-1.51814	24.5	3/4	CD4 monitoring	Arm A (3TC/ABC/NNRTI throughout)	Nevirapine	No	Mother
8	24	<	80	Viral load response	Female	B	8	-1.14	-1.51814	24.5	3/4	CD4 monitoring	Arm A (3TC/ABC/NNRTI throughout)	Nevirapine	No	Mother
8	36	<	80	Viral load response	Female	B	8	-1.14	-1.51814	24.5	3/4	CD4 monitoring	Arm A (3TC/ABC/NNRTI throughout)	Nevirapine	No	Mother
8	48	<	80	Viral load response	Female	B	8	-1.14	-1.51814	24.5	3/4	CD4 monitoring	Arm A (3TC/ABC/NNRTI throughout)	Nevirapine	No	Mother
8	72	<	80	Viral load response	Female	B	8	-1.14	-1.51814	24.5	3/4	CD4 monitoring	Arm A (3TC/ABC/NNRTI throughout)	Nevirapine	No	Mother
8	96	<	80	Viral load response	Female	B	8	-1.14	-1.51814	24.5	3/4	CD4 monitoring	Arm A (3TC/ABC/NNRTI throughout)	Nevirapine	No	Mother
8	144	<	80	Viral load response	Female	B	8	-1.14	-1.51814	24.5	3/4	CD4 monitoring	Arm A (3TC/ABC/NNRTI throughout)	Nevirapine	No	Mother
8	168	<	80	Viral load response	Female	B	8	-1.14	-1.51814	24.5	3/4	CD4 monitoring	Arm A (3TC/ABC/NNRTI throughout)	Nevirapine	No	Mother
8	192	<	80	Viral load response	Female	B	8	-1.14	-1.51814	24.5	3/4	CD4 monitoring	Arm A (3TC/ABC/NNRTI throughout)	Nevirapine	No	Mother
9	0	=	68571	Baseline	Female	A	9	-3.095	-2.42819	19.5	3/4	CD4 monitoring	Arm B (36 weeks ZDV)	Efavirenz	No	Other
9	24	<	80	Viral load response	Female	A	9	-3.095	-2.42819	19.5	3/4	CD4 monitoring	Arm B (36 weeks ZDV)	Efavirenz	No	Other
9	36	<	80	Viral load response	Female	A	9	-3.095	-2.42819	19.5	3/4	CD4 monitoring	Arm B (36 weeks ZDV)	Efavirenz	No	Other
9	48	<	80	Viral load response	Female	A	9	-3.095	-2.42819	19.5	3/4	CD4 monitoring	Arm B (36 weeks ZDV)	Efavirenz	No	Other
9	72	<	80	Viral load response	Female	A	9	-3.095	-2.42819	19.5	3/4	CD4 monitoring	Arm B (36 weeks ZDV)	Efavirenz	No	Other
9	96	<	80	Viral load response	Female	A	9	-3.095	-2.42819	19.5	3/4	CD4 monitoring	Arm B (36 weeks ZDV)	Efavirenz	No	Other
9	120	<	80	Viral load response	Female	A	9	-3.095	-2.42819	19.5	3/4	CD4 monitoring	Arm B (36 weeks ZDV)	Efavirenz	No	Other
9	144	<	80	Viral load response	Female	A	9	-3.095	-2.42819	19.5	3/4	CD4 monitoring	Arm B (36 weeks ZDV)	Efavirenz	No	Other
9	168	<	80	Viral load response	Female	A	9	-3.095	-2.42819	19.5	3/4	CD4 monitoring	Arm B (36 weeks ZDV)	Efavirenz	No	Other
9	192	<	80	Viral load response	Female	A	9	-3.095	-2.42819	19.5	3/4	CD4 monitoring	Arm B (36 weeks ZDV)	Efavirenz	No	Other
10	0	=	126140	Baseline	Male	C	15	-2.025	-1.82326	0	1/2	No CD4 monitoring	Arm B (36 weeks ZDV)	Efavirenz	No	Mother
10	4	=	106	Viral load response	Male	C	15	-2.025	-1.82326	0	1/2	No CD4 monitoring	Arm B (36 weeks ZDV)	Efavirenz	No	Mother
10	24	<	80	Viral load response	Male	C	15	-2.025	-1.82326	0	1/2	No CD4 monitoring	Arm B (36 weeks ZDV)	Efavirenz	No	Mother
10	36	<	80	Viral load response	Male	C	15	-2.025	-1.82326	0	1/2	No CD4 monitoring	Arm B (36 weeks ZDV)	Efavirenz	No	Mother
10	48	<	80	Viral load response	Male	C	15	-2.025	-1.82326	0	1/2	No CD4 monitoring	Arm B (36 weeks ZDV)	Efavirenz	No	Mother
10	72	<	80	Viral load response	Male	C	15	-2.025	-1.82326	0	1/2	No CD4 monitoring	Arm B (36 weeks ZDV)	Efavirenz	No	Mother
10	96	<	80	Viral load response	Male	C	15	-2.025	-1.82326	0	1/2	No CD4 monitoring	Arm B (36 weeks ZDV)	Efavirenz	No	Mother
10	120	<	80	Viral load response	Male	C	15	-2.025	-1.82326	0	1/2	No CD4 monitoring	Arm B (36 weeks ZDV)	Efavirenz	No	Mother
10	144	<	80	Viral load response	Male	C	15	-2.025	-1.82326	0	1/2	No CD4 monitoring	Arm B (36 weeks ZDV)	Efavirenz	No	Mother
10	168	<	80	Viral load response	Male	C	15	-2.025	-1.82326	0	1/2	No CD4 monitoring	Arm B (36 weeks ZDV)	Efavirenz	No	Mother
10	180	<	80	Viral load response	Male	C	15	-2.025	-1.82326	0	1/2	No CD4 monitoring	Arm B (36 weeks ZDV)	Efavirenz	No	Mother
11	0	=	59000	Baseline	Male	A	8	-3.665	-3.95418	9.5	3/4	No CD4 monitoring	Arm B (36 weeks ZDV)	Nevirapine	No	Other
11	4	=	365	Viral load response	Male	A	8	-3.665	-3.95418	9.5	3/4	No CD4 monitoring	Arm B (36 weeks ZDV)	Nevirapine	No	Other
11	24	<	80	Viral load response	Male	A	8	-3.665	-3.95418	9.5	3/4	No CD4 monitoring	Arm B (36 weeks ZDV)	Nevirapine	No	Other
11	36	<	80	Viral load response	Male	A	8	-3.665	-3.95418	9.5	3/4	No CD4 monitoring	Arm B (36 weeks ZDV)	Nevirapine	No	Other
11	48	<	80	Viral load response	Male	A	8	-3.665	-3.95418	9.5	3/4	No CD4 monitoring	Arm B (36 weeks ZDV)	Nevirapine	No	Other
11	72	<	80	Viral load response	Male	A	8	-3.665	-3.95418	9.5	3/4	No CD4 monitoring	Arm B (36 weeks ZDV)	Nevirapine	No	Other
11	96	<	80	Viral load response	Male	A	8	-3.665	-3.95418	9.5	3/4	No CD4 monitoring	Arm B (36 weeks ZDV)	Nevirapine	No	Other
11	120	<	80	Viral load response	Male	A	8	-3.665	-3.95418	9.5	3/4	No CD4 monitoring	Arm B (36 weeks ZDV)	Nevirapine	No	Other
11	144	<	80	Viral load response	Male	A	8	-3.665	-3.95418	9.5	3/4	No CD4 monitoring	Arm B (36 weeks ZDV)	Nevirapine	No	Other
11	168	<	80	Viral load response	Male	A	8	-3.665	-3.95418	9.5	3/4	No CD4 monitoring	Arm B (36 weeks ZDV)	Nevirapine	No	Other
11	192	<	80	Viral load response	Male	A	8	-3.665	-3.95418	9.5	3/4	No CD4 monitoring	Arm B (36 weeks ZDV)	Nevirapine	No	Other
12	0	=	343018	Baseline	Female	D	2	-2.19	-0.817017	22	1/2	No CD4 monitoring	Arm C (long-term ZDV, 3NRTI after week-36)	Nevirapine	No	Mother
12	4	=	698	Viral load response	Female	D	2	-2.19	-0.817017	22	1/2	No CD4 monitoring	Arm C (long-term ZDV, 3NRTI after week-36)	Nevirapine	No	Mother
12	24	<	80	Viral load response	Female	D	2	-2.19	-0.817017	22	1/2	No CD4 monitoring	Arm C (long-term ZDV, 3NRTI after week-36)	Nevirapine	No	Mother
12	36	<	80	Viral load response	Female	D	2	-2.19	-0.817017	22	1/2	No CD4 monitoring	Arm C (long-term ZDV, 3NRTI after week-36)	Nevirapine	No	Mother
12	48	<	80	Viral load response	Female	D	2	-2.19	-0.817017	22	1/2	No CD4 monitoring	Arm C (long-term ZDV, 3NRTI after week-36)	Nevirapine	No	Mother
12	72	<	80	Viral load response	Female	D	2	-2.19	-0.817017	22	1/2	No CD4 monitoring	Arm C (long-term ZDV, 3NRTI after week-36)	Nevirapine	No	Mother
12	84	<	80	Viral load response	Female	D	2	-2.19	-0.817017	22	1/2	No CD4 monitoring	Arm C (long-term ZDV, 3NRTI after week-36)	Nevirapine	No	Mother
12	132	<	80	Viral load response	Female	D	2	-2.19	-0.817017	22	1/2	No CD4 monitoring	Arm C (long-term ZDV, 3NRTI after week-36)	Nevirapine	No	Mother
12	144	<	80	Viral load response	Female	D	2	-2.19	-0.817017	22	1/2	No CD4 monitoring	Arm C (long-term ZDV, 3NRTI after week-36)	Nevirapine	No	Mother
12	168	<	80	Viral load response	Female	D	2	-2.19	-0.817017	22	1/2	No CD4 monitoring	Arm C (long-term ZDV, 3NRTI after week-36)	Nevirapine	No	Mother
12	180	<	80	Viral load response	Female	D	2	-2.19	-0.817017	22	1/2	No CD4 monitoring	Arm C (long-term ZDV, 3NRTI after week-36)	Nevirapine	No	Mother
12	192	<	80	Viral load response	Female	D	2	-2.19	-0.817017	22	1/2	No CD4 monitoring	Arm C (long-term ZDV, 3NRTI after week-36)	Nevirapine	No	Mother
13	0	=	238974	Baseline	Female	D	9	-3.75	-2.96724	11	1/2	CD4 monitoring	Arm B (36 weeks ZDV)	Efavirenz	No	Mother
13	4	=	1098	Viral load response	Female	D	9	-3.75	-2.96724	11	1/2	CD4 monitoring	Arm B (36 weeks ZDV)	Efavirenz	No	Mother
13	24	<	80	Viral load response	Female	D	9	-3.75	-2.96724	11	1/2	CD4 monitoring	Arm B (36 weeks ZDV)	Efavirenz	No	Mother
13	36	<	80	Viral load response	Female	D	9	-3.75	-2.96724	11	1/2	CD4 monitoring	Arm B (36 weeks ZDV)	Efavirenz	No	Mother
13	48	<	80	Viral load response	Female	D	9	-3.75	-2.96724	11	1/2	CD4 monitoring	Arm B (36 weeks ZDV)	Efavirenz	No	Mother
13	72	<	80	Viral load response	Female	D	9	-3.75	-2.96724	11	1/2	CD4 monitoring	Arm B (36 weeks ZDV)	Efavirenz	No	Mother
13	96	<	80	Viral load response	Female	D	9	-3.75	-2.96724	11	1/2	CD4 monitoring	Arm B (36 weeks ZDV)	Efavirenz	No	Mother
13	120	<	80	Viral load response	Female	D	9	-3.75	-2.96724	11	1/2	CD4 monitoring	Arm B (36 weeks ZDV)	Efavirenz	No	Mother
13	144	<	80	Viral load response	Female	D	9	-3.75	-2.96724	11	1/2	CD4 monitoring	Arm B (36 weeks ZDV)	Efavirenz	No	Mother
13	168	<	80	Viral load response	Female	D	9	-3.75	-2.96724	11	1/2	CD4 monitoring	Arm B (36 weeks ZDV)	Efavirenz	No	Mother
13	180	<	80	Viral load response	Female	D	9	-3.75	-2.96724	11	1/2	CD4 monitoring	Arm B (36 weeks ZDV)	Efavirenz	No	Mother
14	0	=	170588	Baseline	Female	C	3	-0.865	-0.501469	13.5	1/2	No CD4 monitoring	Arm A (3TC/ABC/NNRTI throughout)	Efavirenz	No	Mother
14	4	=	750	Viral load response	Female	C	3	-0.865	-0.501469	13.5	1/2	No CD4 monitoring	Arm A (3TC/ABC/NNRTI throughout)	Efavirenz	No	Mother
14	36	<	80	Viral load response	Female	C	3	-0.865	-0.501469	13.5	1/2	No CD4 monitoring	Arm A (3TC/ABC/NNRTI throughout)	Efavirenz	No	Mother
14	48	<	80	Viral load response	Female	C	3	-0.865	-0.501469	13.5	1/2	No CD4 monitoring	Arm A (3TC/ABC/NNRTI throughout)	Efavirenz	No	Mother
14	72	<	80	Viral load response	Female	C	3	-0.865	-0.501469	13.5	1/2	No CD4 monitoring	Arm A (3TC/ABC/NNRTI throughout)	Efavirenz	No	Mother
14	96	<	80	Viral load response	Female	C	3	-0.865	-0.501469	13.5	1/2	No CD4 monitoring	Arm A (3TC/ABC/NNRTI throughout)	Efavirenz	No	Mother
14	120	<	80	Viral load response	Female	C	3	-0.865	-0.501469	13.5	1/2	No CD4 monitoring	Arm A (3TC/ABC/NNRTI throughout)	Efavirenz	No	Mother
14	132	<	80	Viral load response	Female	C	3	-0.865	-0.501469	13.5	1/2	No CD4 monitoring	Arm A (3TC/ABC/NNRTI throughout)	Efavirenz	No	Mother
14	180	<	80	Viral load response	Female	C	3	-0.865	-0.501469	13.5	1/2	No CD4 monitoring	Arm A (3TC/ABC/NNRTI throughout)	Efavirenz	No	Mother
14	192	<	80	Viral load response	Female	C	3	-0.865	-0.501469	13.5	1/2	No CD4 monitoring	Arm A (3TC/ABC/NNRTI throughout)	Efavirenz	No	Mother
14	216	<	80	Viral load response	Female	C	3	-0.865	-0.501469	13.5	1/2	No CD4 monitoring	Arm A (3TC/ABC/NNRTI throughout)	Efavirenz	No	Mother
15	0	=	13758	Baseline	Female	B	1	-2.795	-2.8776	25	3/4	CD4 monitoring	Arm A (3TC/ABC/NNRTI throughout)	Nevirapine	No	Mother
15	4	=	110	Viral load response	Female	B	1	-2.795	-2.8776	25	3/4	CD4 monitoring	Arm A (3TC/ABC/NNRTI throughout)	Nevirapine	No	Mother
15	24	<	80	Viral load response	Female	B	1	-2.795	-2.8776	25	3/4	CD4 monitoring	Arm A (3TC/ABC/NNRTI throughout)	Nevirapine	No	Mother
15	36	<	80	Viral load response	Female	B	1	-2.795	-2.8776	25	3/4	CD4 monitoring	Arm A (3TC/ABC/NNRTI throughout)	Nevirapine	No	Mother
15	48	<	80	Viral load response	Female	B	1	-2.795	-2.8776	25	3/4	CD4 monitoring	Arm A (3TC/ABC/NNRTI throughout)	Nevirapine	No	Mother
15	60	<	80	Viral load response	Female	B	1	-2.795	-2.8776	25	3/4	CD4 monitoring	Arm A (3TC/ABC/NNRTI throughout)	Nevirapine	No	Mother
15	72	<	80	Viral load response	Female	B	1	-2.795	-2.8776	25	3/4	CD4 monitoring	Arm A (3TC/ABC/NNRTI throughout)	Nevirapine	No	Mother
15	96	<	80	Viral load response	Female	B	1	-2.795	-2.8776	25	3/4	CD4 monitoring	Arm A (3TC/ABC/NNRTI throughout)	Nevirapine	No	Mother
15	108	<	80	Viral load response	Female	B	1	-2.795	-2.8776	25	3/4	CD4 monitoring	Arm A (3TC/ABC/NNRTI throughout)	Nevirapine	No	Mother
15	120	<	80	Viral load response	Female	B	1	-2.795	-2.8776	25	3/4	CD4 monitoring	Arm A (3TC/ABC/NNRTI throughout)	Nevirapine	No	Mother
15	156	<	80	Viral load response	Female	B	1	-2.795	-2.8776	25	3/4	CD4 monitoring	Arm A (3TC/ABC/NNRTI throughout)	Nevirapine	No	Mother
15	168	<	80	Viral load response	Female	B	1	-2.795	-2.8776	25	3/4	CD4 monitoring	Arm A (3TC/ABC/NNRTI throughout)	Nevirapine	No	Mother
15	180	<	80	Viral load response	Female	B	1	-2.795	-2.8776	25	3/4	CD4 monitoring	Arm A (3TC/ABC/NNRTI throughout)	Nevirapine	No	Mother
16	0	=	428778	Baseline	Male	D	5	-1.95	-2.30393	2.5	1/2	CD4 monitoring	Arm C (long-term ZDV, 3NRTI after week-36)	Efavirenz	No	Mother
16	4	=	1232	Viral load response	Male	D	5	-1.95	-2.30393	2.5	1/2	CD4 monitoring	Arm C (long-term ZDV, 3NRTI after week-36)	Efavirenz	No	Mother
16	24	<	80	Viral load response	Male	D	5	-1.95	-2.30393	2.5	1/2	CD4 monitoring	Arm C (long-term ZDV, 3NRTI after week-36)	Efavirenz	No	Mother
16	36	<	80	Viral load response	Male	D	5	-1.95	-2.30393	2.5	1/2	CD4 monitoring	Arm C (long-term ZDV, 3NRTI after week-36)	Efavirenz	No	Mother
16	48	<	80	Viral load response	Male	D	5	-1.95	-2.30393	2.5	1/2	CD4 monitoring	Arm C (long-term ZDV, 3NRTI after week-36)	Efavirenz	No	Mother
16	72	<	80	Viral load response	Male	D	5	-1.95	-2.30393	2.5	1/2	CD4 monitoring	Arm C (long-term ZDV, 3NRTI after week-36)	Efavirenz	No	Mother
16	96	<	80	Viral load response	Male	D	5	-1.95	-2.30393	2.5	1/2	CD4 monitoring	Arm C (long-term ZDV, 3NRTI after week-36)	Efavirenz	No	Mother
16	120	<	80	Viral load response	Male	D	5	-1.95	-2.30393	2.5	1/2	CD4 monitoring	Arm C (long-term ZDV, 3NRTI after week-36)	Efavirenz	No	Mother
16	144	<	80	Viral load response	Male	D	5	-1.95	-2.30393	2.5	1/2	CD4 monitoring	Arm C (long-term ZDV, 3NRTI after week-36)	Efavirenz	No	Mother
16	168	<	80	Viral load response	Male	D	5	-1.95	-2.30393	2.5	1/2	CD4 monitoring	Arm C (long-term ZDV, 3NRTI after week-36)	Efavirenz	No	Mother
16	192	<	80	Viral load response	Male	D	5	-1.95	-2.30393	2.5	1/2	CD4 monitoring	Arm C (long-term ZDV, 3NRTI after week-36)	Efavirenz	No	Mother
17	0	=	137500	Baseline	Female	A	11	-3.76	-3.89456	12	3/4	No CD4 monitoring	Arm A (3TC/ABC/NNRTI throughout)	Efavirenz	No	Other
17	4	=	169	Viral load response	Female	A	11	-3.76	-3.89456	12	3/4	No CD4 monitoring	Arm A (3TC/ABC/NNRTI throughout)	Efavirenz	No	Other
17	24	<	80	Viral load response	Female	A	11	-3.76	-3.89456	12	3/4	No CD4 monitoring	Arm A (3TC/ABC/NNRTI throughout)	Efavirenz	No	Other
17	36	<	80	Viral load response	Female	A	11	-3.76	-3.89456	12	3/4	No CD4 monitoring	Arm A (3TC/ABC/NNRTI throughout)	Efavirenz	No	Other
17	48	<	80	Viral load response	Female	A	11	-3.76	-3.89456	12	3/4	No CD4 monitoring	Arm A (3TC/ABC/NNRTI throughout)	Efavirenz	No	Other
17	72	<	80	Viral load response	Female	A	11	-3.76	-3.89456	12	3/4	No CD4 monitoring	Arm A (3TC/ABC/NNRTI throughout)	Efavirenz	No	Other
17	96	<	80	Viral load response	Female	A	11	-3.76	-3.89456	12	3/4	No CD4 monitoring	Arm A (3TC/ABC/NNRTI throughout)	Efavirenz	No	Other
17	120	<	80	Viral load response	Female	A	11	-3.76	-3.89456	12	3/4	No CD4 monitoring	Arm A (3TC/ABC/NNRTI throughout)	Efavirenz	No	Other
17	144	<	80	Viral load response	Female	A	11	-3.76	-3.89456	12	3/4	No CD4 monitoring	Arm A (3TC/ABC/NNRTI throughout)	Efavirenz	No	Other
17	168	<	80	Viral load response	Female	A	11	-3.76	-3.89456	12	3/4	No CD4 monitoring	Arm A (3TC/ABC/NNRTI throughout)	Efavirenz	No	Other
17	192	<	80	Viral load response	Female	A	11	-3.76	-3.89456	12	3/4	No CD4 monitoring	Arm A (3TC/ABC/NNRTI throughout)	Efavirenz	No	Other
18	0	=	8104	Baseline	Male	B	8	1.56	0.68585	26.5	3/4	No CD4 monitoring	Arm A (3TC/ABC/NNRTI throughout)	Efavirenz	No	Mother
18	4	=	172	Viral load response	Male	B	8	1.56	0.68585	26.5	3/4	No CD4 monitoring	Arm A (3TC/ABC/NNRTI throughout)	Efavirenz	No	Mother
18	24	<	80	Viral load response	Male	B	8	1.56	0.68585	26.5	3/4	No CD4 monitoring	Arm A (3TC/ABC/NNRTI throughout)	Efavirenz	No	Mother
18	36	<	80	Viral load response	Male	B	8	1.56	0.68585	26.5	3/4	No CD4 monitoring	Arm A (3TC/ABC/NNRTI throughout)	Efavirenz	No	Mother
18	48	<	80	Viral load response	Male	B	8	1.56	0.68585	26.5	3/4	No CD4 monitoring	Arm A (3TC/ABC/NNRTI throughout)	Efavirenz	No	Mother
18	72	<	80	Viral load response	Male	B	8	1.56	0.68585	26.5	3/4	No CD4 monitoring	Arm A (3TC/ABC/NNRTI throughout)	Efavirenz	No	Mother
18	96	<	80	Viral load response	Male	B	8	1.56	0.68585	26.5	3/4	No CD4 monitoring	Arm A (3TC/ABC/NNRTI throughout)	Efavirenz	No	Mother
18	120	<	80	Viral load response	Male	B	8	1.56	0.68585	26.5	3/4	No CD4 monitoring	Arm A (3TC/ABC/NNRTI throughout)	Efavirenz	No	Mother
18	144	<	80	Viral load response	Male	B	8	1.56	0.68585	26.5	3/4	No CD4 monitoring	Arm A (3TC/ABC/NNRTI throughout)	Efavirenz	No	Mother
18	168	<	80	Viral load response	Male	B	8	1.56	0.68585	26.5	3/4	No CD4 monitoring	Arm A (3TC/ABC/NNRTI throughout)	Efavirenz	No	Mother
18	180	<	80	Viral load response	Male	B	8	1.56	0.68585	26.5	3/4	No CD4 monitoring	Arm A (3TC/ABC/NNRTI throughout)	Efavirenz	No	Mother
19	0	=	4008962	Baseline	Female	D	2	-2.68	-3.44395	16	1/2	CD4 monitoring	Arm B (36 weeks ZDV)	Nevirapine	No	Mother
19	4	=	4734	Viral load response	Female	D	2	-2.68	-3.44395	16	1/2	CD4 monitoring	Arm B (36 weeks ZDV)	Nevirapine	No	Mother
19	24	<	80	Viral load response	Female	D	2	-2.68	-3.44395	16	1/2	CD4 monitoring	Arm B (36 weeks ZDV)	Nevirapine	No	Mother
19	36	<	80	Viral load response	Female	D	2	-2.68	-3.44395	16	1/2	CD4 monitoring	Arm B (36 weeks ZDV)	Nevirapine	No	Mother
19	48	<	80	Viral load response	Female	D	2	-2.68	-3.44395	16	1/2	CD4 monitoring	Arm B (36 weeks ZDV)	Nevirapine	No	Mother
19	72	<	80	Viral load response	Female	D	2	-2.68	-3.44395	16	1/2	CD4 monitoring	Arm B (36 weeks ZDV)	Nevirapine	No	Mother
19	96	<	80	Viral load response	Female	D	2	-2.68	-3.44395	16	1/2	CD4 monitoring	Arm B (36 weeks ZDV)	Nevirapine	No	Mother
19	120	<	80	Viral load response	Female	D	2	-2.68	-3.44395	16	1/2	CD4 monitoring	Arm B (36 weeks ZDV)	Nevirapine	No	Mother
19	144	<	80	Viral load response	Female	D	2	-2.68	-3.44395	16	1/2	CD4 monitoring	Arm B (36 weeks ZDV)	Nevirapine	No	Mother
19	168	<	80	Viral load response	Female	D	2	-2.68	-3.44395	16	1/2	CD4 monitoring	Arm B (36 weeks ZDV)	Nevirapine	No	Mother
19	180	<	80	Viral load response	Female	D	2	-2.68	-3.44395	16	1/2	CD4 monitoring	Arm B (36 weeks ZDV)	Nevirapine	No	Mother
20	0	=	43684	Baseline	Female	C	13	0.04	0.358796	12.5	1/2	No CD4 monitoring	Arm A (3TC/ABC/NNRTI throughout)	Efavirenz	No	Other
20	4	=	152	Viral load response	Female	C	13	0.04	0.358796	12.5	1/2	No CD4 monitoring	Arm A (3TC/ABC/NNRTI throughout)	Efavirenz	No	Other
20	12	<	80	Viral load response	Female	C	13	0.04	0.358796	12.5	1/2	No CD4 monitoring	Arm A (3TC/ABC/NNRTI throughout)	Efavirenz	No	Other
20	36	<	80	Viral load response	Female	C	13	0.04	0.358796	12.5	1/2	No CD4 monitoring	Arm A (3TC/ABC/NNRTI throughout)	Efavirenz	No	Other
20	48	<	80	Viral load response	Female	C	13	0.04	0.358796	12.5	1/2	No CD4 monitoring	Arm A (3TC/ABC/NNRTI throughout)	Efavirenz	No	Other
20	72	<	80	Viral load response	Female	C	13	0.04	0.358796	12.5	1/2	No CD4 monitoring	Arm A (3TC/ABC/NNRTI throughout)	Efavirenz	No	Other
20	96	<	80	Viral load response	Female	C	13	0.04	0.358796	12.5	1/2	No CD4 monitoring	Arm A (3TC/ABC/NNRTI throughout)	Efavirenz	No	Other
20	120	<	80	Viral load response	Female	C	13	0.04	0.358796	12.5	1/2	No CD4 monitoring	Arm A (3TC/ABC/NNRTI throughout)	Efavirenz	No	Other
20	144	<	80	Viral load response	Female	C	13	0.04	0.358796	12.5	1/2	No CD4 monitoring	Arm A (3TC/ABC/NNRTI throughout)	Efavirenz	No	Other
20	168	<	80	Viral load response	Female	C	13	0.04	0.358796	12.5	1/2	No CD4 monitoring	Arm A (3TC/ABC/NNRTI throughout)	Efavirenz	No	Other
20	192	<	80	Viral load response	Female	C	13	0.04	0.358796	12.5	1/2	No CD4 monitoring	Arm A (3TC/ABC/NNRTI throughout)	Efavirenz	No	Other
21	0	=	2746	Baseline	Female	C	17	-1.16	0.648721	15.5	1/2	No CD4 monitoring	Arm C (long-term ZDV, 3NRTI after week-36)	Efavirenz	No	Other
21	4	=	102	Viral load response	Female	C	17	-1.16	0.648721	15.5	1/2	No CD4 monitoring	Arm C (long-term ZDV, 3NRTI after week-36)	Efavirenz	No	Other
21	24	<	80	Viral load response	Female	C	17	-1.16	0.648721	15.5	1/2	No CD4 monitoring	Arm C (long-term ZDV, 3NRTI after week-36)	Efavirenz	No	Other
21	36	<	80	Viral load response	Female	C	17	-1.16	0.648721	15.5	1/2	No CD4 monitoring	Arm C (long-term ZDV, 3NRTI after week-36)	Efavirenz	No	Other
21	48	<	80	Viral load response	Female	C	17	-1.16	0.648721	15.5	1/2	No CD4 monitoring	Arm C (long-term ZDV, 3NRTI after week-36)	Efavirenz	No	Other
21	72	<	80	Viral load response	Female	C	17	-1.16	0.648721	15.5	1/2	No CD4 monitoring	Arm C (long-term ZDV, 3NRTI after week-36)	Efavirenz	No	Other
21	96	<	80	Viral load response	Female	C	17	-1.16	0.648721	15.5	1/2	No CD4 monitoring	Arm C (long-term ZDV, 3NRTI after week-36)	Efavirenz	No	Other
21	120	<	80	Viral load response	Female	C	17	-1.16	0.648721	15.5	1/2	No CD4 monitoring	Arm C (long-term ZDV, 3NRTI after week-36)	Efavirenz	No	Other
21	168	<	80	Viral load response	Female	C	17	-1.16	0.648721	15.5	1/2	No CD4 monitoring	Arm C (long-term ZDV, 3NRTI after week-36)	Efavirenz	No	Other
21	192	<	80	Viral load response	Female	C	17	-1.16	0.648721	15.5	1/2	No CD4 monitoring	Arm C (long-term ZDV, 3NRTI after week-36)	Efavirenz	No	Other
22	0	=	200432	Baseline	Male	A	1	-4.115	-3.46391	12.45	3/4	CD4 monitoring	Arm A (3TC/ABC/NNRTI throughout)	Nevirapine	No	Mother
22	4	=	360	Viral load response	Male	A	1	-4.115	-3.46391	12.45	3/4	CD4 monitoring	Arm A (3TC/ABC/NNRTI throughout)	Nevirapine	No	Mother
22	24	<	80	Viral load response	Male	A	1	-4.115	-3.46391	12.45	3/4	CD4 monitoring	Arm A (3TC/ABC/NNRTI throughout)	Nevirapine	No	Mother
22	36	<	80	Viral load response	Male	A	1	-4.115	-3.46391	12.45	3/4	CD4 monitoring	Arm A (3TC/ABC/NNRTI throughout)	Nevirapine	No	Mother
22	48	<	80	Viral load response	Male	A	1	-4.115	-3.46391	12.45	3/4	CD4 monitoring	Arm A (3TC/ABC/NNRTI throughout)	Nevirapine	No	Mother
22	72	<	80	Viral load response	Male	A	1	-4.115	-3.46391	12.45	3/4	CD4 monitoring	Arm A (3TC/ABC/NNRTI throughout)	Nevirapine	No	Mother
22	144	<	80	Viral load response	Male	A	1	-4.115	-3.46391	12.45	3/4	CD4 monitoring	Arm A (3TC/ABC/NNRTI throughout)	Nevirapine	No	Mother
22	168	<	80	Viral load response	Male	A	1	-4.115	-3.46391	12.45	3/4	CD4 monitoring	Arm A (3TC/ABC/NNRTI throughout)	Nevirapine	No	Mother
22	192	<	80	Viral load response	Male	A	1	-4.115	-3.46391	12.45	3/4	CD4 monitoring	Arm A (3TC/ABC/NNRTI throughout)	Nevirapine	No	Mother
23	0	=	81330	Baseline	Female	C	2	-2.37	-2.82247	15.5	3/4	No CD4 monitoring	Arm C (long-term ZDV, 3NRTI after week-36)	Nevirapine	No	Other
23	4	=	708	Viral load response	Female	C	2	-2.37	-2.82247	15.5	3/4	No CD4 monitoring	Arm C (long-term ZDV, 3NRTI after week-36)	Nevirapine	No	Other
23	24	<	80	Viral load response	Female	C	2	-2.37	-2.82247	15.5	3/4	No CD4 monitoring	Arm C (long-term ZDV, 3NRTI after week-36)	Nevirapine	No	Other
23	36	<	80	Viral load response	Female	C	2	-2.37	-2.82247	15.5	3/4	No CD4 monitoring	Arm C (long-term ZDV, 3NRTI after week-36)	Nevirapine	No	Other
23	48	<	80	Viral load response	Female	C	2	-2.37	-2.82247	15.5	3/4	No CD4 monitoring	Arm C (long-term ZDV, 3NRTI after week-36)	Nevirapine	No	Other
23	72	<	80	Viral load response	Female	C	2	-2.37	-2.82247	15.5	3/4	No CD4 monitoring	Arm C (long-term ZDV, 3NRTI after week-36)	Nevirapine	No	Other
23	96	<	80	Viral load response	Female	C	2	-2.37	-2.82247	15.5	3/4	No CD4 monitoring	Arm C (long-term ZDV, 3NRTI after week-36)	Nevirapine	No	Other
23	120	<	80	Viral load response	Female	C	2	-2.37	-2.82247	15.5	3/4	No CD4 monitoring	Arm C (long-term ZDV, 3NRTI after week-36)	Nevirapine	No	Other
23	144	<	80	Viral load response	Female	C	2	-2.37	-2.82247	15.5	3/4	No CD4 monitoring	Arm C (long-term ZDV, 3NRTI after week-36)	Nevirapine	No	Other
23	168	<	80	Viral load response	Female	C	2	-2.37	-2.82247	15.5	3/4	No CD4 monitoring	Arm C (long-term ZDV, 3NRTI after week-36)	Nevirapine	No	Other
23	192	<	80	Viral load response	Female	C	2	-2.37	-2.82247	15.5	3/4	No CD4 monitoring	Arm C (long-term ZDV, 3NRTI after week-36)	Nevirapine	No	Other
24	0	=	8787940	Baseline	Female	C	0	-1.965	-1.49786	4	3/4	No CD4 monitoring	Arm B (36 weeks ZDV)	Nevirapine	No	Mother
24	4	=	2890	Viral load response	Female	C	0	-1.965	-1.49786	4	3/4	No CD4 monitoring	Arm B (36 weeks ZDV)	Nevirapine	No	Mother
24	12	=	146	Viral load response	Female	C	0	-1.965	-1.49786	4	3/4	No CD4 monitoring	Arm B (36 weeks ZDV)	Nevirapine	No	Mother
24	36	<	80	Viral load response	Female	C	0	-1.965	-1.49786	4	3/4	No CD4 monitoring	Arm B (36 weeks ZDV)	Nevirapine	No	Mother
24	48	<	80	Viral load response	Female	C	0	-1.965	-1.49786	4	3/4	No CD4 monitoring	Arm B (36 weeks ZDV)	Nevirapine	No	Mother
24	72	<	80	Viral load response	Female	C	0	-1.965	-1.49786	4	3/4	No CD4 monitoring	Arm B (36 weeks ZDV)	Nevirapine	No	Mother
24	96	<	80	Viral load response	Female	C	0	-1.965	-1.49786	4	3/4	No CD4 monitoring	Arm B (36 weeks ZDV)	Nevirapine	No	Mother
24	120	<	80	Viral load response	Female	C	0	-1.965	-1.49786	4	3/4	No CD4 monitoring	Arm B (36 weeks ZDV)	Nevirapine	No	Mother
24	144	<	80	Viral load response	Female	C	0	-1.965	-1.49786	4	3/4	No CD4 monitoring	Arm B (36 weeks ZDV)	Nevirapine	No	Mother
24	168	<	80	Viral load response	Female	C	0	-1.965	-1.49786	4	3/4	No CD4 monitoring	Arm B (36 weeks ZDV)	Nevirapine	No	Mother
24	192	<	80	Viral load response	Female	C	0	-1.965	-1.49786	4	3/4	No CD4 monitoring	Arm B (36 weeks ZDV)	Nevirapine	No	Mother
24	216	<	80	Viral load response	Female	C	0	-1.965	-1.49786	4	3/4	No CD4 monitoring	Arm B (36 weeks ZDV)	Nevirapine	No	Mother
25	0	=	38654	Baseline	Male	D	8	-1.52	-1.96929	5.5	3/4	CD4 monitoring	Arm B (36 weeks ZDV)	Efavirenz	No	Other
25	4	=	110	Viral load response	Male	D	8	-1.52	-1.96929	5.5	3/4	CD4 monitoring	Arm B (36 weeks ZDV)	Efavirenz	No	Other
25	24	<	80	Viral load response	Male	D	8	-1.52	-1.96929	5.5	3/4	CD4 monitoring	Arm B (36 weeks ZDV)	Efavirenz	No	Other
25	36	<	80	Viral load response	Male	D	8	-1.52	-1.96929	5.5	3/4	CD4 monitoring	Arm B (36 weeks ZDV)	Efavirenz	No	Other
25	48	<	80	Viral load response	Male	D	8	-1.52	-1.96929	5.5	3/4	CD4 monitoring	Arm B (36 weeks ZDV)	Efavirenz	No	Other
25	72	<	80	Viral load response	Male	D	8	-1.52	-1.96929	5.5	3/4	CD4 monitoring	Arm B (36 weeks ZDV)	Efavirenz	No	Other
25	96	<	80	Viral load response	Male	D	8	-1.52	-1.96929	5.5	3/4	CD4 monitoring	Arm B (36 weeks ZDV)	Efavirenz	No	Other
25	120	<	80	Viral load response	Male	D	8	-1.52	-1.96929	5.5	3/4	CD4 monitoring	Arm B (36 weeks ZDV)	Efavirenz	No	Other
25	144	<	80	Viral load response	Male	D	8	-1.52	-1.96929	5.5	3/4	CD4 monitoring	Arm B (36 weeks ZDV)	Efavirenz	No	Other
25	168	<	80	Viral load response	Male	D	8	-1.52	-1.96929	5.5	3/4	CD4 monitoring	Arm B (36 weeks ZDV)	Efavirenz	No	Other
25	192	<	80	Viral load response	Male	D	8	-1.52	-1.96929	5.5	3/4	CD4 monitoring	Arm B (36 weeks ZDV)	Efavirenz	No	Other
26	0	=	20076	Baseline	Male	B	8	0.52	0.297551	21	3/4	No CD4 monitoring	Arm A (3TC/ABC/NNRTI throughout)	Efavirenz	No	Mother
26	4	=	296	Viral load response	Male	B	8	0.52	0.297551	21	3/4	No CD4 monitoring	Arm A (3TC/ABC/NNRTI throughout)	Efavirenz	No	Mother
26	24	<	80	Viral load response	Male	B	8	0.52	0.297551	21	3/4	No CD4 monitoring	Arm A (3TC/ABC/NNRTI throughout)	Efavirenz	No	Mother
26	36	<	80	Viral load response	Male	B	8	0.52	0.297551	21	3/4	No CD4 monitoring	Arm A (3TC/ABC/NNRTI throughout)	Efavirenz	No	Mother
26	48	<	80	Viral load response	Male	B	8	0.52	0.297551	21	3/4	No CD4 monitoring	Arm A (3TC/ABC/NNRTI throughout)	Efavirenz	No	Mother
26	72	<	80	Viral load response	Male	B	8	0.52	0.297551	21	3/4	No CD4 monitoring	Arm A (3TC/ABC/NNRTI throughout)	Efavirenz	No	Mother
26	96	<	80	Viral load response	Male	B	8	0.52	0.297551	21	3/4	No CD4 monitoring	Arm A (3TC/ABC/NNRTI throughout)	Efavirenz	No	Mother
26	120	<	80	Viral load response	Male	B	8	0.52	0.297551	21	3/4	No CD4 monitoring	Arm A (3TC/ABC/NNRTI throughout)	Efavirenz	No	Mother
26	144	<	80	Viral load response	Male	B	8	0.52	0.297551	21	3/4	No CD4 monitoring	Arm A (3TC/ABC/NNRTI throughout)	Efavirenz	No	Mother
26	156	<	80	Viral load response	Male	B	8	0.52	0.297551	21	3/4	No CD4 monitoring	Arm A (3TC/ABC/NNRTI throughout)	Efavirenz	No	Mother
27	0	=	140558	Baseline	Female	B	1	2.115	1.36908	27.55	3/4	No CD4 monitoring	Arm A (3TC/ABC/NNRTI throughout)	Nevirapine	No	Mother
27	4	=	192	Viral load response	Female	B	1	2.115	1.36908	27.55	3/4	No CD4 monitoring	Arm A (3TC/ABC/NNRTI throughout)	Nevirapine	No	Mother
27	36	<	80	Viral load response	Female	B	1	2.115	1.36908	27.55	3/4	No CD4 monitoring	Arm A (3TC/ABC/NNRTI throughout)	Nevirapine	No	Mother
27	48	<	80	Viral load response	Female	B	1	2.115	1.36908	27.55	3/4	No CD4 monitoring	Arm A (3TC/ABC/NNRTI throughout)	Nevirapine	No	Mother
27	72	<	80	Viral load response	Female	B	1	2.115	1.36908	27.55	3/4	No CD4 monitoring	Arm A (3TC/ABC/NNRTI throughout)	Nevirapine	No	Mother
27	96	<	80	Viral load response	Female	B	1	2.115	1.36908	27.55	3/4	No CD4 monitoring	Arm A (3TC/ABC/NNRTI throughout)	Nevirapine	No	Mother
27	120	<	80	Viral load response	Female	B	1	2.115	1.36908	27.55	3/4	No CD4 monitoring	Arm A (3TC/ABC/NNRTI throughout)	Nevirapine	No	Mother
27	144	<	80	Viral load response	Female	B	1	2.115	1.36908	27.55	3/4	No CD4 monitoring	Arm A (3TC/ABC/NNRTI throughout)	Nevirapine	No	Mother
27	168	<	80	Viral load response	Female	B	1	2.115	1.36908	27.55	3/4	No CD4 monitoring	Arm A (3TC/ABC/NNRTI throughout)	Nevirapine	No	Mother
27	192	<	80	Viral load response	Female	B	1	2.115	1.36908	27.55	3/4	No CD4 monitoring	Arm A (3TC/ABC/NNRTI throughout)	Nevirapine	No	Mother
27	204	<	80	Viral load response	Female	B	1	2.115	1.36908	27.55	3/4	No CD4 monitoring	Arm A (3TC/ABC/NNRTI throughout)	Nevirapine	No	Mother
28	0	=	2502854	Baseline	Male	D	2	-3.82	-2.73644	12	1/2	CD4 monitoring	Arm C (long-term ZDV, 3NRTI after week-36)	Nevirapine	No	Mother
28	4	=	360	Viral load response	Male	D	2	-3.82	-2.73644	12	1/2	CD4 monitoring	Arm C (long-term ZDV, 3NRTI after week-36)	Nevirapine	No	Mother
28	12	<	80	Viral load response	Male	D	2	-3.82	-2.73644	12	1/2	CD4 monitoring	Arm C (long-term ZDV, 3NRTI after week-36)	Nevirapine	No	Mother
28	24	=	80	Viral load response	Male	D	2	-3.82	-2.73644	12	1/2	CD4 monitoring	Arm C (long-term ZDV, 3NRTI after week-36)	Nevirapine	No	Mother
28	36	<	80	Viral load response	Male	D	2	-3.82	-2.73644	12	1/2	CD4 monitoring	Arm C (long-term ZDV, 3NRTI after week-36)	Nevirapine	No	Mother
28	48	<	80	Viral load response	Male	D	2	-3.82	-2.73644	12	1/2	CD4 monitoring	Arm C (long-term ZDV, 3NRTI after week-36)	Nevirapine	No	Mother
28	72	<	80	Viral load response	Male	D	2	-3.82	-2.73644	12	1/2	CD4 monitoring	Arm C (long-term ZDV, 3NRTI after week-36)	Nevirapine	No	Mother
28	84	<	80	Viral load response	Male	D	2	-3.82	-2.73644	12	1/2	CD4 monitoring	Arm C (long-term ZDV, 3NRTI after week-36)	Nevirapine	No	Mother
28	96	<	80	Viral load response	Male	D	2	-3.82	-2.73644	12	1/2	CD4 monitoring	Arm C (long-term ZDV, 3NRTI after week-36)	Nevirapine	No	Mother
28	120	<	80	Viral load response	Male	D	2	-3.82	-2.73644	12	1/2	CD4 monitoring	Arm C (long-term ZDV, 3NRTI after week-36)	Nevirapine	No	Mother
28	132	<	80	Viral load response	Male	D	2	-3.82	-2.73644	12	1/2	CD4 monitoring	Arm C (long-term ZDV, 3NRTI after week-36)	Nevirapine	No	Mother
28	144	<	80	Viral load response	Male	D	2	-3.82	-2.73644	12	1/2	CD4 monitoring	Arm C (long-term ZDV, 3NRTI after week-36)	Nevirapine	No	Mother
28	168	<	80	Viral load response	Male	D	2	-3.82	-2.73644	12	1/2	CD4 monitoring	Arm C (long-term ZDV, 3NRTI after week-36)	Nevirapine	No	Mother
28	180	<	80	Viral load response	Male	D	2	-3.82	-2.73644	12	1/2	CD4 monitoring	Arm C (long-term ZDV, 3NRTI after week-36)	Nevirapine	No	Mother
28	192	<	80	Viral load response	Male	D	2	-3.82	-2.73644	12	1/2	CD4 monitoring	Arm C (long-term ZDV, 3NRTI after week-36)	Nevirapine	No	Mother
29	0	=	1110520	Baseline	Male	D	9	-2.37	-3.00367	6	3/4	No CD4 monitoring	Arm B (36 weeks ZDV)	Efavirenz	No	Other
29	4	<	80	Viral load response	Male	D	9	-2.37	-3.00367	6	3/4	No CD4 monitoring	Arm B (36 weeks ZDV)	Efavirenz	No	Other
29	24	<	80	Viral load response	Male	D	9	-2.37	-3.00367	6	3/4	No CD4 monitoring	Arm B (36 weeks ZDV)	Efavirenz	No	Other
29	36	<	80	Viral load response	Male	D	9	-2.37	-3.00367	6	3/4	No CD4 monitoring	Arm B (36 weeks ZDV)	Efavirenz	No	Other
29	48	<	80	Viral load response	Male	D	9	-2.37	-3.00367	6	3/4	No CD4 monitoring	Arm B (36 weeks ZDV)	Efavirenz	No	Other
29	72	<	80	Viral load response	Male	D	9	-2.37	-3.00367	6	3/4	No CD4 monitoring	Arm B (36 weeks ZDV)	Efavirenz	No	Other
29	96	<	80	Viral load response	Male	D	9	-2.37	-3.00367	6	3/4	No CD4 monitoring	Arm B (36 weeks ZDV)	Efavirenz	No	Other
29	120	<	80	Viral load response	Male	D	9	-2.37	-3.00367	6	3/4	No CD4 monitoring	Arm B (36 weeks ZDV)	Efavirenz	No	Other
29	144	<	80	Viral load response	Male	D	9	-2.37	-3.00367	6	3/4	No CD4 monitoring	Arm B (36 weeks ZDV)	Efavirenz	No	Other
29	168	<	80	Viral load response	Male	D	9	-2.37	-3.00367	6	3/4	No CD4 monitoring	Arm B (36 weeks ZDV)	Efavirenz	No	Other
29	180	<	80	Viral load response	Male	D	9	-2.37	-3.00367	6	3/4	No CD4 monitoring	Arm B (36 weeks ZDV)	Efavirenz	No	Other
30	0	=	680730	Baseline	Male	C	8	-2.305	-3.52517	16	3/4	CD4 monitoring	Arm C (long-term ZDV, 3NRTI after week-36)	Efavirenz	No	Other
30	4	=	2532	Viral load response	Male	C	8	-2.305	-3.52517	16	3/4	CD4 monitoring	Arm C (long-term ZDV, 3NRTI after week-36)	Efavirenz	No	Other
30	24	<	80	Viral load response	Male	C	8	-2.305	-3.52517	16	3/4	CD4 monitoring	Arm C (long-term ZDV, 3NRTI after week-36)	Efavirenz	No	Other
30	36	<	80	Viral load response	Male	C	8	-2.305	-3.52517	16	3/4	CD4 monitoring	Arm C (long-term ZDV, 3NRTI after week-36)	Efavirenz	No	Other
30	48	<	80	Viral load response	Male	C	8	-2.305	-3.52517	16	3/4	CD4 monitoring	Arm C (long-term ZDV, 3NRTI after week-36)	Efavirenz	No	Other
30	72	<	80	Viral load response	Male	C	8	-2.305	-3.52517	16	3/4	CD4 monitoring	Arm C (long-term ZDV, 3NRTI after week-36)	Efavirenz	No	Other
30	96	<	80	Viral load response	Male	C	8	-2.305	-3.52517	16	3/4	CD4 monitoring	Arm C (long-term ZDV, 3NRTI after week-36)	Efavirenz	No	Other
30	120	<	80	Viral load response	Male	C	8	-2.305	-3.52517	16	3/4	CD4 monitoring	Arm C (long-term ZDV, 3NRTI after week-36)	Efavirenz	No	Other
30	144	<	80	Viral load response	Male	C	8	-2.305	-3.52517	16	3/4	CD4 monitoring	Arm C (long-term ZDV, 3NRTI after week-36)	Efavirenz	No	Other
30	168	<	80	Viral load response	Male	C	8	-2.305	-3.52517	16	3/4	CD4 monitoring	Arm C (long-term ZDV, 3NRTI after week-36)	Efavirenz	No	Other
30	192	<	80	Viral load response	Male	C	8	-2.305	-3.52517	16	3/4	CD4 monitoring	Arm C (long-term ZDV, 3NRTI after week-36)	Efavirenz	No	Other
30	216	<	80	Viral load response	Male	C	8	-2.305	-3.52517	16	3/4	CD4 monitoring	Arm C (long-term ZDV, 3NRTI after week-36)	Efavirenz	No	Other
31	0	=	242246	Baseline	Female	C	6	-4.415	-3.05155	11.5	3/4	No CD4 monitoring	Arm B (36 weeks ZDV)	Efavirenz	No	Mother
31	4	=	526	Viral load response	Female	C	6	-4.415	-3.05155	11.5	3/4	No CD4 monitoring	Arm B (36 weeks ZDV)	Efavirenz	No	Mother
31	36	<	80	Viral load response	Female	C	6	-4.415	-3.05155	11.5	3/4	No CD4 monitoring	Arm B (36 weeks ZDV)	Efavirenz	No	Mother
31	48	<	80	Viral load response	Female	C	6	-4.415	-3.05155	11.5	3/4	No CD4 monitoring	Arm B (36 weeks ZDV)	Efavirenz	No	Mother
31	72	<	80	Viral load response	Female	C	6	-4.415	-3.05155	11.5	3/4	No CD4 monitoring	Arm B (36 weeks ZDV)	Efavirenz	No	Mother
31	96	<	80	Viral load response	Female	C	6	-4.415	-3.05155	11.5	3/4	No CD4 monitoring	Arm B (36 weeks ZDV)	Efavirenz	No	Mother
31	120	<	80	Viral load response	Female	C	6	-4.415	-3.05155	11.5	3/4	No CD4 monitoring	Arm B (36 weeks ZDV)	Efavirenz	No	Mother
31	144	<	80	Viral load response	Female	C	6	-4.415	-3.05155	11.5	3/4	No CD4 monitoring	Arm B (36 weeks ZDV)	Efavirenz	No	Mother
31	168	<	80	Viral load response	Female	C	6	-4.415	-3.05155	11.5	3/4	No CD4 monitoring	Arm B (36 weeks ZDV)	Efavirenz	No	Mother
32	0	=	49370	Baseline	Female	C	14	-1.84	-0.0920786	20	3/4	No CD4 monitoring	Arm A (3TC/ABC/NNRTI throughout)	Efavirenz	No	Mother
32	4	=	476	Viral load response	Female	C	14	-1.84	-0.0920786	20	3/4	No CD4 monitoring	Arm A (3TC/ABC/NNRTI throughout)	Efavirenz	No	Mother
32	36	<	80	Viral load response	Female	C	14	-1.84	-0.0920786	20	3/4	No CD4 monitoring	Arm A (3TC/ABC/NNRTI throughout)	Efavirenz	No	Mother
32	48	<	80	Viral load response	Female	C	14	-1.84	-0.0920786	20	3/4	No CD4 monitoring	Arm A (3TC/ABC/NNRTI throughout)	Efavirenz	No	Mother
32	72	<	80	Viral load response	Female	C	14	-1.84	-0.0920786	20	3/4	No CD4 monitoring	Arm A (3TC/ABC/NNRTI throughout)	Efavirenz	No	Mother
32	96	<	80	Viral load response	Female	C	14	-1.84	-0.0920786	20	3/4	No CD4 monitoring	Arm A (3TC/ABC/NNRTI throughout)	Efavirenz	No	Mother
32	120	<	80	Viral load response	Female	C	14	-1.84	-0.0920786	20	3/4	No CD4 monitoring	Arm A (3TC/ABC/NNRTI throughout)	Efavirenz	No	Mother
32	144	<	80	Viral load response	Female	C	14	-1.84	-0.0920786	20	3/4	No CD4 monitoring	Arm A (3TC/ABC/NNRTI throughout)	Efavirenz	No	Mother
32	168	<	80	Viral load response	Female	C	14	-1.84	-0.0920786	20	3/4	No CD4 monitoring	Arm A (3TC/ABC/NNRTI throughout)	Efavirenz	No	Mother
32	192	<	80	Viral load response	Female	C	14	-1.84	-0.0920786	20	3/4	No CD4 monitoring	Arm A (3TC/ABC/NNRTI throughout)	Efavirenz	No	Mother
33	0	=	160000	Baseline	Female	A	12	-2.315	-2.54158	1	3/4	CD4 monitoring	Arm B (36 weeks ZDV)	Efavirenz	No	Other
33	4	=	358	Viral load response	Female	A	12	-2.315	-2.54158	1	3/4	CD4 monitoring	Arm B (36 weeks ZDV)	Efavirenz	No	Other
33	24	<	80	Viral load response	Female	A	12	-2.315	-2.54158	1	3/4	CD4 monitoring	Arm B (36 weeks ZDV)	Efavirenz	No	Other
33	36	<	80	Viral load response	Female	A	12	-2.315	-2.54158	1	3/4	CD4 monitoring	Arm B (36 weeks ZDV)	Efavirenz	No	Other
33	48	<	80	Viral load response	Female	A	12	-2.315	-2.54158	1	3/4	CD4 monitoring	Arm B (36 weeks ZDV)	Efavirenz	No	Other
33	72	<	80	Viral load response	Female	A	12	-2.315	-2.54158	1	3/4	CD4 monitoring	Arm B (36 weeks ZDV)	Efavirenz	No	Other
33	96	<	80	Viral load response	Female	A	12	-2.315	-2.54158	1	3/4	CD4 monitoring	Arm B (36 weeks ZDV)	Efavirenz	No	Other
33	108	<	80	Viral load response	Female	A	12	-2.315	-2.54158	1	3/4	CD4 monitoring	Arm B (36 weeks ZDV)	Efavirenz	No	Other
33	120	<	80	Viral load response	Female	A	12	-2.315	-2.54158	1	3/4	CD4 monitoring	Arm B (36 weeks ZDV)	Efavirenz	No	Other
33	132	<	80	Viral load response	Female	A	12	-2.315	-2.54158	1	3/4	CD4 monitoring	Arm B (36 weeks ZDV)	Efavirenz	No	Other
33	168	<	80	Viral load response	Female	A	12	-2.315	-2.54158	1	3/4	CD4 monitoring	Arm B (36 weeks ZDV)	Efavirenz	No	Other
33	180	<	80	Viral load response	Female	A	12	-2.315	-2.54158	1	3/4	CD4 monitoring	Arm B (36 weeks ZDV)	Efavirenz	No	Other
34	0	=	12606	Baseline	Male	D	1	-2.435	-1.17942	16	1/2	No CD4 monitoring	Arm C (long-term ZDV, 3NRTI after week-36)	Nevirapine	Yes	Mother
34	4	=	170	Viral load response	Male	D	1	-2.435	-1.17942	16	1/2	No CD4 monitoring	Arm C (long-term ZDV, 3NRTI after week-36)	Nevirapine	Yes	Mother
34	24	<	80	Viral load response	Male	D	1	-2.435	-1.17942	16	1/2	No CD4 monitoring	Arm C (long-term ZDV, 3NRTI after week-36)	Nevirapine	Yes	Mother
34	36	<	80	Viral load response	Male	D	1	-2.435	-1.17942	16	1/2	No CD4 monitoring	Arm C (long-term ZDV, 3NRTI after week-36)	Nevirapine	Yes	Mother
34	48	<	80	Viral load response	Male	D	1	-2.435	-1.17942	16	1/2	No CD4 monitoring	Arm C (long-term ZDV, 3NRTI after week-36)	Nevirapine	Yes	Mother
34	72	<	80	Viral load response	Male	D	1	-2.435	-1.17942	16	1/2	No CD4 monitoring	Arm C (long-term ZDV, 3NRTI after week-36)	Nevirapine	Yes	Mother
34	96	<	80	Viral load response	Male	D	1	-2.435	-1.17942	16	1/2	No CD4 monitoring	Arm C (long-term ZDV, 3NRTI after week-36)	Nevirapine	Yes	Mother
34	144	<	80	Viral load response	Male	D	1	-2.435	-1.17942	16	1/2	No CD4 monitoring	Arm C (long-term ZDV, 3NRTI after week-36)	Nevirapine	Yes	Mother
34	168	<	80	Viral load response	Male	D	1	-2.435	-1.17942	16	1/2	No CD4 monitoring	Arm C (long-term ZDV, 3NRTI after week-36)	Nevirapine	Yes	Mother
34	180	<	80	Viral load response	Male	D	1	-2.435	-1.17942	16	1/2	No CD4 monitoring	Arm C (long-term ZDV, 3NRTI after week-36)	Nevirapine	Yes	Mother
35	0	=	120206	Baseline	Male	B	1	-2.57	-4.07692	4	3/4	CD4 monitoring	Arm A (3TC/ABC/NNRTI throughout)	Nevirapine	No	Mother
35	4	=	966	Viral load response	Male	B	1	-2.57	-4.07692	4	3/4	CD4 monitoring	Arm A (3TC/ABC/NNRTI throughout)	Nevirapine	No	Mother
35	24	=	112	Viral load response	Male	B	1	-2.57	-4.07692	4	3/4	CD4 monitoring	Arm A (3TC/ABC/NNRTI throughout)	Nevirapine	No	Mother
35	36	<	80	Viral load response	Male	B	1	-2.57	-4.07692	4	3/4	CD4 monitoring	Arm A (3TC/ABC/NNRTI throughout)	Nevirapine	No	Mother
35	48	<	80	Viral load response	Male	B	1	-2.57	-4.07692	4	3/4	CD4 monitoring	Arm A (3TC/ABC/NNRTI throughout)	Nevirapine	No	Mother
35	60	<	80	Viral load response	Male	B	1	-2.57	-4.07692	4	3/4	CD4 monitoring	Arm A (3TC/ABC/NNRTI throughout)	Nevirapine	No	Mother
35	72	<	80	Viral load response	Male	B	1	-2.57	-4.07692	4	3/4	CD4 monitoring	Arm A (3TC/ABC/NNRTI throughout)	Nevirapine	No	Mother
35	96	<	80	Viral load response	Male	B	1	-2.57	-4.07692	4	3/4	CD4 monitoring	Arm A (3TC/ABC/NNRTI throughout)	Nevirapine	No	Mother
35	108	<	80	Viral load response	Male	B	1	-2.57	-4.07692	4	3/4	CD4 monitoring	Arm A (3TC/ABC/NNRTI throughout)	Nevirapine	No	Mother
35	144	<	80	Viral load response	Male	B	1	-2.57	-4.07692	4	3/4	CD4 monitoring	Arm A (3TC/ABC/NNRTI throughout)	Nevirapine	No	Mother
35	156	<	80	Viral load response	Male	B	1	-2.57	-4.07692	4	3/4	CD4 monitoring	Arm A (3TC/ABC/NNRTI throughout)	Nevirapine	No	Mother
35	168	<	80	Viral load response	Male	B	1	-2.57	-4.07692	4	3/4	CD4 monitoring	Arm A (3TC/ABC/NNRTI throughout)	Nevirapine	No	Mother
35	192	<	80	Viral load response	Male	B	1	-2.57	-4.07692	4	3/4	CD4 monitoring	Arm A (3TC/ABC/NNRTI throughout)	Nevirapine	No	Mother
36	0	=	685374	Baseline	Female	D	6	-2.545	-2.45861	18	1/2	No CD4 monitoring	Arm A (3TC/ABC/NNRTI throughout)	Efavirenz	No	Mother
36	4	=	848	Viral load response	Female	D	6	-2.545	-2.45861	18	1/2	No CD4 monitoring	Arm A (3TC/ABC/NNRTI throughout)	Efavirenz	No	Mother
36	24	<	80	Viral load response	Female	D	6	-2.545	-2.45861	18	1/2	No CD4 monitoring	Arm A (3TC/ABC/NNRTI throughout)	Efavirenz	No	Mother
36	36	<	80	Viral load response	Female	D	6	-2.545	-2.45861	18	1/2	No CD4 monitoring	Arm A (3TC/ABC/NNRTI throughout)	Efavirenz	No	Mother
36	48	<	80	Viral load response	Female	D	6	-2.545	-2.45861	18	1/2	No CD4 monitoring	Arm A (3TC/ABC/NNRTI throughout)	Efavirenz	No	Mother
36	72	<	80	Viral load response	Female	D	6	-2.545	-2.45861	18	1/2	No CD4 monitoring	Arm A (3TC/ABC/NNRTI throughout)	Efavirenz	No	Mother
36	96	<	80	Viral load response	Female	D	6	-2.545	-2.45861	18	1/2	No CD4 monitoring	Arm A (3TC/ABC/NNRTI throughout)	Efavirenz	No	Mother
36	132	<	80	Viral load response	Female	D	6	-2.545	-2.45861	18	1/2	No CD4 monitoring	Arm A (3TC/ABC/NNRTI throughout)	Efavirenz	No	Mother
36	144	<	80	Viral load response	Female	D	6	-2.545	-2.45861	18	1/2	No CD4 monitoring	Arm A (3TC/ABC/NNRTI throughout)	Efavirenz	No	Mother
36	168	<	80	Viral load response	Female	D	6	-2.545	-2.45861	18	1/2	No CD4 monitoring	Arm A (3TC/ABC/NNRTI throughout)	Efavirenz	No	Mother
36	192	<	80	Viral load response	Female	D	6	-2.545	-2.45861	18	1/2	No CD4 monitoring	Arm A (3TC/ABC/NNRTI throughout)	Efavirenz	No	Mother
37	0	=	2482758	Baseline	Male	D	2	-2.85	-2.94773	6	1/2	CD4 monitoring	Arm A (3TC/ABC/NNRTI throughout)	Nevirapine	No	Other
37	4	=	6324	Viral load response	Male	D	2	-2.85	-2.94773	6	1/2	CD4 monitoring	Arm A (3TC/ABC/NNRTI throughout)	Nevirapine	No	Other
37	24	<	80	Viral load response	Male	D	2	-2.85	-2.94773	6	1/2	CD4 monitoring	Arm A (3TC/ABC/NNRTI throughout)	Nevirapine	No	Other
37	36	<	80	Viral load response	Male	D	2	-2.85	-2.94773	6	1/2	CD4 monitoring	Arm A (3TC/ABC/NNRTI throughout)	Nevirapine	No	Other
37	48	<	80	Viral load response	Male	D	2	-2.85	-2.94773	6	1/2	CD4 monitoring	Arm A (3TC/ABC/NNRTI throughout)	Nevirapine	No	Other
37	60	<	80	Viral load response	Male	D	2	-2.85	-2.94773	6	1/2	CD4 monitoring	Arm A (3TC/ABC/NNRTI throughout)	Nevirapine	No	Other
37	72	<	80	Viral load response	Male	D	2	-2.85	-2.94773	6	1/2	CD4 monitoring	Arm A (3TC/ABC/NNRTI throughout)	Nevirapine	No	Other
37	96	<	80	Viral load response	Male	D	2	-2.85	-2.94773	6	1/2	CD4 monitoring	Arm A (3TC/ABC/NNRTI throughout)	Nevirapine	No	Other
37	108	<	80	Viral load response	Male	D	2	-2.85	-2.94773	6	1/2	CD4 monitoring	Arm A (3TC/ABC/NNRTI throughout)	Nevirapine	No	Other
37	120	<	80	Viral load response	Male	D	2	-2.85	-2.94773	6	1/2	CD4 monitoring	Arm A (3TC/ABC/NNRTI throughout)	Nevirapine	No	Other
37	144	<	80	Viral load response	Male	D	2	-2.85	-2.94773	6	1/2	CD4 monitoring	Arm A (3TC/ABC/NNRTI throughout)	Nevirapine	No	Other
37	156	<	80	Viral load response	Male	D	2	-2.85	-2.94773	6	1/2	CD4 monitoring	Arm A (3TC/ABC/NNRTI throughout)	Nevirapine	No	Other
37	168	<	80	Viral load response	Male	D	2	-2.85	-2.94773	6	1/2	CD4 monitoring	Arm A (3TC/ABC/NNRTI throughout)	Nevirapine	No	Other
37	192	<	80	Viral load response	Male	D	2	-2.85	-2.94773	6	1/2	CD4 monitoring	Arm A (3TC/ABC/NNRTI throughout)	Nevirapine	No	Other
38	0	=	5130	Baseline	Male	B	6	-0.45	-0.474656	36.5	3/4	CD4 monitoring	Arm B (36 weeks ZDV)	Efavirenz	No	Mother
38	4	<	80	Viral load response	Male	B	6	-0.45	-0.474656	36.5	3/4	CD4 monitoring	Arm B (36 weeks ZDV)	Efavirenz	No	Mother
38	24	<	80	Viral load response	Male	B	6	-0.45	-0.474656	36.5	3/4	CD4 monitoring	Arm B (36 weeks ZDV)	Efavirenz	No	Mother
38	36	<	80	Viral load response	Male	B	6	-0.45	-0.474656	36.5	3/4	CD4 monitoring	Arm B (36 weeks ZDV)	Efavirenz	No	Mother
38	48	<	80	Viral load response	Male	B	6	-0.45	-0.474656	36.5	3/4	CD4 monitoring	Arm B (36 weeks ZDV)	Efavirenz	No	Mother
38	60	<	80	Viral load response	Male	B	6	-0.45	-0.474656	36.5	3/4	CD4 monitoring	Arm B (36 weeks ZDV)	Efavirenz	No	Mother
38	72	<	80	Viral load response	Male	B	6	-0.45	-0.474656	36.5	3/4	CD4 monitoring	Arm B (36 weeks ZDV)	Efavirenz	No	Mother
38	96	<	80	Viral load response	Male	B	6	-0.45	-0.474656	36.5	3/4	CD4 monitoring	Arm B (36 weeks ZDV)	Efavirenz	No	Mother
38	108	<	80	Viral load response	Male	B	6	-0.45	-0.474656	36.5	3/4	CD4 monitoring	Arm B (36 weeks ZDV)	Efavirenz	No	Mother
38	120	<	80	Viral load response	Male	B	6	-0.45	-0.474656	36.5	3/4	CD4 monitoring	Arm B (36 weeks ZDV)	Efavirenz	No	Mother
38	144	<	80	Viral load response	Male	B	6	-0.45	-0.474656	36.5	3/4	CD4 monitoring	Arm B (36 weeks ZDV)	Efavirenz	No	Mother
38	156	<	80	Viral load response	Male	B	6	-0.45	-0.474656	36.5	3/4	CD4 monitoring	Arm B (36 weeks ZDV)	Efavirenz	No	Mother
38	168	<	80	Viral load response	Male	B	6	-0.45	-0.474656	36.5	3/4	CD4 monitoring	Arm B (36 weeks ZDV)	Efavirenz	No	Mother
38	192	<	80	Viral load response	Male	B	6	-0.45	-0.474656	36.5	3/4	CD4 monitoring	Arm B (36 weeks ZDV)	Efavirenz	No	Mother
38	204	<	80	Viral load response	Male	B	6	-0.45	-0.474656	36.5	3/4	CD4 monitoring	Arm B (36 weeks ZDV)	Efavirenz	No	Mother
39	0	=	371740	Baseline	Female	C	5	-3.44	-2.90509	7.5	1/2	No CD4 monitoring	Arm B (36 weeks ZDV)	Efavirenz	No	Other
39	4	=	696	Viral load response	Female	C	5	-3.44	-2.90509	7.5	1/2	No CD4 monitoring	Arm B (36 weeks ZDV)	Efavirenz	No	Other
39	24	<	80	Viral load response	Female	C	5	-3.44	-2.90509	7.5	1/2	No CD4 monitoring	Arm B (36 weeks ZDV)	Efavirenz	No	Other
39	36	<	80	Viral load response	Female	C	5	-3.44	-2.90509	7.5	1/2	No CD4 monitoring	Arm B (36 weeks ZDV)	Efavirenz	No	Other
39	48	<	80	Viral load response	Female	C	5	-3.44	-2.90509	7.5	1/2	No CD4 monitoring	Arm B (36 weeks ZDV)	Efavirenz	No	Other
39	60	<	80	Viral load response	Female	C	5	-3.44	-2.90509	7.5	1/2	No CD4 monitoring	Arm B (36 weeks ZDV)	Efavirenz	No	Other
39	72	<	80	Viral load response	Female	C	5	-3.44	-2.90509	7.5	1/2	No CD4 monitoring	Arm B (36 weeks ZDV)	Efavirenz	No	Other
39	96	<	80	Viral load response	Female	C	5	-3.44	-2.90509	7.5	1/2	No CD4 monitoring	Arm B (36 weeks ZDV)	Efavirenz	No	Other
39	108	<	80	Viral load response	Female	C	5	-3.44	-2.90509	7.5	1/2	No CD4 monitoring	Arm B (36 weeks ZDV)	Efavirenz	No	Other
39	120	<	80	Viral load response	Female	C	5	-3.44	-2.90509	7.5	1/2	No CD4 monitoring	Arm B (36 weeks ZDV)	Efavirenz	No	Other
39	144	<	80	Viral load response	Female	C	5	-3.44	-2.90509	7.5	1/2	No CD4 monitoring	Arm B (36 weeks ZDV)	Efavirenz	No	Other
39	156	<	80	Viral load response	Female	C	5	-3.44	-2.90509	7.5	1/2	No CD4 monitoring	Arm B (36 weeks ZDV)	Efavirenz	No	Other
39	168	<	80	Viral load response	Female	C	5	-3.44	-2.90509	7.5	1/2	No CD4 monitoring	Arm B (36 weeks ZDV)	Efavirenz	No	Other
39	180	<	80	Viral load response	Female	C	5	-3.44	-2.90509	7.5	1/2	No CD4 monitoring	Arm B (36 weeks ZDV)	Efavirenz	No	Other
39	204	<	80	Viral load response	Female	C	5	-3.44	-2.90509	7.5	1/2	No CD4 monitoring	Arm B (36 weeks ZDV)	Efavirenz	No	Other
40	0	=	53932	Baseline	Female	D	9	-2.525	-2.74667	22.5	3/4	No CD4 monitoring	Arm C (long-term ZDV, 3NRTI after week-36)	Efavirenz	No	Mother
40	4	=	152	Viral load response	Female	D	9	-2.525	-2.74667	22.5	3/4	No CD4 monitoring	Arm C (long-term ZDV, 3NRTI after week-36)	Efavirenz	No	Mother
40	24	<	80	Viral load response	Female	D	9	-2.525	-2.74667	22.5	3/4	No CD4 monitoring	Arm C (long-term ZDV, 3NRTI after week-36)	Efavirenz	No	Mother
40	36	<	80	Viral load response	Female	D	9	-2.525	-2.74667	22.5	3/4	No CD4 monitoring	Arm C (long-term ZDV, 3NRTI after week-36)	Efavirenz	No	Mother
40	48	<	80	Viral load response	Female	D	9	-2.525	-2.74667	22.5	3/4	No CD4 monitoring	Arm C (long-term ZDV, 3NRTI after week-36)	Efavirenz	No	Mother
40	72	<	80	Viral load response	Female	D	9	-2.525	-2.74667	22.5	3/4	No CD4 monitoring	Arm C (long-term ZDV, 3NRTI after week-36)	Efavirenz	No	Mother
40	96	<	80	Viral load response	Female	D	9	-2.525	-2.74667	22.5	3/4	No CD4 monitoring	Arm C (long-term ZDV, 3NRTI after week-36)	Efavirenz	No	Mother
40	120	<	80	Viral load response	Female	D	9	-2.525	-2.74667	22.5	3/4	No CD4 monitoring	Arm C (long-term ZDV, 3NRTI after week-36)	Efavirenz	No	Mother
40	144	<	80	Viral load response	Female	D	9	-2.525	-2.74667	22.5	3/4	No CD4 monitoring	Arm C (long-term ZDV, 3NRTI after week-36)	Efavirenz	No	Mother
40	168	<	80	Viral load response	Female	D	9	-2.525	-2.74667	22.5	3/4	No CD4 monitoring	Arm C (long-term ZDV, 3NRTI after week-36)	Efavirenz	No	Mother
40	180	<	80	Viral load response	Female	D	9	-2.525	-2.74667	22.5	3/4	No CD4 monitoring	Arm C (long-term ZDV, 3NRTI after week-36)	Efavirenz	No	Mother
41	0	=	363010	Baseline	Female	B	14	-2.5	-4.4895	6.5	3/4	CD4 monitoring	Arm A (3TC/ABC/NNRTI throughout)	Nevirapine	No	Other
41	4	=	234	Viral load response	Female	B	14	-2.5	-4.4895	6.5	3/4	CD4 monitoring	Arm A (3TC/ABC/NNRTI throughout)	Nevirapine	No	Other
41	24	<	80	Viral load response	Female	B	14	-2.5	-4.4895	6.5	3/4	CD4 monitoring	Arm A (3TC/ABC/NNRTI throughout)	Nevirapine	No	Other
41	36	<	80	Viral load response	Female	B	14	-2.5	-4.4895	6.5	3/4	CD4 monitoring	Arm A (3TC/ABC/NNRTI throughout)	Nevirapine	No	Other
41	48	<	80	Viral load response	Female	B	14	-2.5	-4.4895	6.5	3/4	CD4 monitoring	Arm A (3TC/ABC/NNRTI throughout)	Nevirapine	No	Other
41	72	<	80	Viral load response	Female	B	14	-2.5	-4.4895	6.5	3/4	CD4 monitoring	Arm A (3TC/ABC/NNRTI throughout)	Nevirapine	No	Other
41	96	<	80	Viral load response	Female	B	14	-2.5	-4.4895	6.5	3/4	CD4 monitoring	Arm A (3TC/ABC/NNRTI throughout)	Nevirapine	No	Other
41	144	<	80	Viral load response	Female	B	14	-2.5	-4.4895	6.5	3/4	CD4 monitoring	Arm A (3TC/ABC/NNRTI throughout)	Nevirapine	No	Other
41	168	<	80	Viral load response	Female	B	14	-2.5	-4.4895	6.5	3/4	CD4 monitoring	Arm A (3TC/ABC/NNRTI throughout)	Nevirapine	No	Other
41	180	<	80	Viral load response	Female	B	14	-2.5	-4.4895	6.5	3/4	CD4 monitoring	Arm A (3TC/ABC/NNRTI throughout)	Nevirapine	No	Other
42	0	=	601310	Baseline	Female	A	7	-2.615	-2.13027	1.5	3/4	No CD4 monitoring	Arm B (36 weeks ZDV)	Nevirapine	No	Other
42	4	=	1269	Viral load response	Female	A	7	-2.615	-2.13027	1.5	3/4	No CD4 monitoring	Arm B (36 weeks ZDV)	Nevirapine	No	Other
42	24	<	80	Viral load response	Female	A	7	-2.615	-2.13027	1.5	3/4	No CD4 monitoring	Arm B (36 weeks ZDV)	Nevirapine	No	Other
42	36	<	80	Viral load response	Female	A	7	-2.615	-2.13027	1.5	3/4	No CD4 monitoring	Arm B (36 weeks ZDV)	Nevirapine	No	Other
42	48	<	80	Viral load response	Female	A	7	-2.615	-2.13027	1.5	3/4	No CD4 monitoring	Arm B (36 weeks ZDV)	Nevirapine	No	Other
42	96	<	80	Viral load response	Female	A	7	-2.615	-2.13027	1.5	3/4	No CD4 monitoring	Arm B (36 weeks ZDV)	Nevirapine	No	Other
42	108	<	80	Viral load response	Female	A	7	-2.615	-2.13027	1.5	3/4	No CD4 monitoring	Arm B (36 weeks ZDV)	Nevirapine	No	Other
42	120	<	80	Viral load response	Female	A	7	-2.615	-2.13027	1.5	3/4	No CD4 monitoring	Arm B (36 weeks ZDV)	Nevirapine	No	Other
42	132	<	80	Viral load response	Female	A	7	-2.615	-2.13027	1.5	3/4	No CD4 monitoring	Arm B (36 weeks ZDV)	Nevirapine	No	Other
42	144	<	80	Viral load response	Female	A	7	-2.615	-2.13027	1.5	3/4	No CD4 monitoring	Arm B (36 weeks ZDV)	Nevirapine	No	Other
42	168	<	80	Viral load response	Female	A	7	-2.615	-2.13027	1.5	3/4	No CD4 monitoring	Arm B (36 weeks ZDV)	Nevirapine	No	Other
42	192	<	80	Viral load response	Female	A	7	-2.615	-2.13027	1.5	3/4	No CD4 monitoring	Arm B (36 weeks ZDV)	Nevirapine	No	Other
43	0	=	1008990	Baseline	Female	D	1	-2.585	-3.38236	14	3/4	No CD4 monitoring	Arm B (36 weeks ZDV)	Nevirapine	No	Mother
43	4	=	3008	Viral load response	Female	D	1	-2.585	-3.38236	14	3/4	No CD4 monitoring	Arm B (36 weeks ZDV)	Nevirapine	No	Mother
43	24	<	80	Viral load response	Female	D	1	-2.585	-3.38236	14	3/4	No CD4 monitoring	Arm B (36 weeks ZDV)	Nevirapine	No	Mother
43	36	<	80	Viral load response	Female	D	1	-2.585	-3.38236	14	3/4	No CD4 monitoring	Arm B (36 weeks ZDV)	Nevirapine	No	Mother
43	48	<	80	Viral load response	Female	D	1	-2.585	-3.38236	14	3/4	No CD4 monitoring	Arm B (36 weeks ZDV)	Nevirapine	No	Mother
43	72	<	80	Viral load response	Female	D	1	-2.585	-3.38236	14	3/4	No CD4 monitoring	Arm B (36 weeks ZDV)	Nevirapine	No	Mother
43	96	<	80	Viral load response	Female	D	1	-2.585	-3.38236	14	3/4	No CD4 monitoring	Arm B (36 weeks ZDV)	Nevirapine	No	Mother
43	120	<	80	Viral load response	Female	D	1	-2.585	-3.38236	14	3/4	No CD4 monitoring	Arm B (36 weeks ZDV)	Nevirapine	No	Mother
43	144	<	80	Viral load response	Female	D	1	-2.585	-3.38236	14	3/4	No CD4 monitoring	Arm B (36 weeks ZDV)	Nevirapine	No	Mother
43	168	<	80	Viral load response	Female	D	1	-2.585	-3.38236	14	3/4	No CD4 monitoring	Arm B (36 weeks ZDV)	Nevirapine	No	Mother
43	180	<	80	Viral load response	Female	D	1	-2.585	-3.38236	14	3/4	No CD4 monitoring	Arm B (36 weeks ZDV)	Nevirapine	No	Mother
44	0	=	78066	Baseline	Female	C	1	-4.14	-0.646156	20	3/4	CD4 monitoring	Arm B (36 weeks ZDV)	Nevirapine	Yes	Mother
44	4	=	596	Viral load response	Female	C	1	-4.14	-0.646156	20	3/4	CD4 monitoring	Arm B (36 weeks ZDV)	Nevirapine	Yes	Mother
44	24	<	80	Viral load response	Female	C	1	-4.14	-0.646156	20	3/4	CD4 monitoring	Arm B (36 weeks ZDV)	Nevirapine	Yes	Mother
44	36	<	80	Viral load response	Female	C	1	-4.14	-0.646156	20	3/4	CD4 monitoring	Arm B (36 weeks ZDV)	Nevirapine	Yes	Mother
44	48	<	80	Viral load response	Female	C	1	-4.14	-0.646156	20	3/4	CD4 monitoring	Arm B (36 weeks ZDV)	Nevirapine	Yes	Mother
44	60	<	80	Viral load response	Female	C	1	-4.14	-0.646156	20	3/4	CD4 monitoring	Arm B (36 weeks ZDV)	Nevirapine	Yes	Mother
44	72	<	80	Viral load response	Female	C	1	-4.14	-0.646156	20	3/4	CD4 monitoring	Arm B (36 weeks ZDV)	Nevirapine	Yes	Mother
44	96	<	80	Viral load response	Female	C	1	-4.14	-0.646156	20	3/4	CD4 monitoring	Arm B (36 weeks ZDV)	Nevirapine	Yes	Mother
44	108	<	80	Viral load response	Female	C	1	-4.14	-0.646156	20	3/4	CD4 monitoring	Arm B (36 weeks ZDV)	Nevirapine	Yes	Mother
44	120	<	80	Viral load response	Female	C	1	-4.14	-0.646156	20	3/4	CD4 monitoring	Arm B (36 weeks ZDV)	Nevirapine	Yes	Mother
44	144	<	80	Viral load response	Female	C	1	-4.14	-0.646156	20	3/4	CD4 monitoring	Arm B (36 weeks ZDV)	Nevirapine	Yes	Mother
44	156	<	80	Viral load response	Female	C	1	-4.14	-0.646156	20	3/4	CD4 monitoring	Arm B (36 weeks ZDV)	Nevirapine	Yes	Mother
44	168	<	80	Viral load response	Female	C	1	-4.14	-0.646156	20	3/4	CD4 monitoring	Arm B (36 weeks ZDV)	Nevirapine	Yes	Mother
44	180	<	80	Viral load response	Female	C	1	-4.14	-0.646156	20	3/4	CD4 monitoring	Arm B (36 weeks ZDV)	Nevirapine	Yes	Mother
44	192	<	80	Viral load response	Female	C	1	-4.14	-0.646156	20	3/4	CD4 monitoring	Arm B (36 weeks ZDV)	Nevirapine	Yes	Mother
45	0	=	1070536	Baseline	Female	D	1	-1.93	-2.92746	15.5	3/4	No CD4 monitoring	Arm C (long-term ZDV, 3NRTI after week-36)	Nevirapine	Yes	Mother
45	4	=	1182	Viral load response	Female	D	1	-1.93	-2.92746	15.5	3/4	No CD4 monitoring	Arm C (long-term ZDV, 3NRTI after week-36)	Nevirapine	Yes	Mother
45	24	<	80	Viral load response	Female	D	1	-1.93	-2.92746	15.5	3/4	No CD4 monitoring	Arm C (long-term ZDV, 3NRTI after week-36)	Nevirapine	Yes	Mother
45	36	<	80	Viral load response	Female	D	1	-1.93	-2.92746	15.5	3/4	No CD4 monitoring	Arm C (long-term ZDV, 3NRTI after week-36)	Nevirapine	Yes	Mother
45	48	<	80	Viral load response	Female	D	1	-1.93	-2.92746	15.5	3/4	No CD4 monitoring	Arm C (long-term ZDV, 3NRTI after week-36)	Nevirapine	Yes	Mother
45	72	<	80	Viral load response	Female	D	1	-1.93	-2.92746	15.5	3/4	No CD4 monitoring	Arm C (long-term ZDV, 3NRTI after week-36)	Nevirapine	Yes	Mother
45	84	<	80	Viral load response	Female	D	1	-1.93	-2.92746	15.5	3/4	No CD4 monitoring	Arm C (long-term ZDV, 3NRTI after week-36)	Nevirapine	Yes	Mother
45	96	<	80	Viral load response	Female	D	1	-1.93	-2.92746	15.5	3/4	No CD4 monitoring	Arm C (long-term ZDV, 3NRTI after week-36)	Nevirapine	Yes	Mother
45	132	<	80	Viral load response	Female	D	1	-1.93	-2.92746	15.5	3/4	No CD4 monitoring	Arm C (long-term ZDV, 3NRTI after week-36)	Nevirapine	Yes	Mother
45	156	<	80	Viral load response	Female	D	1	-1.93	-2.92746	15.5	3/4	No CD4 monitoring	Arm C (long-term ZDV, 3NRTI after week-36)	Nevirapine	Yes	Mother
46	0	=	104358	Baseline	Female	C	2	-2.545	0.12536	12.5	1/2	No CD4 monitoring	Arm C (long-term ZDV, 3NRTI after week-36)	Nevirapine	No	Mother
46	4	<	80	Viral load response	Female	C	2	-2.545	0.12536	12.5	1/2	No CD4 monitoring	Arm C (long-term ZDV, 3NRTI after week-36)	Nevirapine	No	Mother
46	24	<	80	Viral load response	Female	C	2	-2.545	0.12536	12.5	1/2	No CD4 monitoring	Arm C (long-term ZDV, 3NRTI after week-36)	Nevirapine	No	Mother
46	36	<	80	Viral load response	Female	C	2	-2.545	0.12536	12.5	1/2	No CD4 monitoring	Arm C (long-term ZDV, 3NRTI after week-36)	Nevirapine	No	Mother
46	48	<	80	Viral load response	Female	C	2	-2.545	0.12536	12.5	1/2	No CD4 monitoring	Arm C (long-term ZDV, 3NRTI after week-36)	Nevirapine	No	Mother
46	72	<	80	Viral load response	Female	C	2	-2.545	0.12536	12.5	1/2	No CD4 monitoring	Arm C (long-term ZDV, 3NRTI after week-36)	Nevirapine	No	Mother
46	84	<	80	Viral load response	Female	C	2	-2.545	0.12536	12.5	1/2	No CD4 monitoring	Arm C (long-term ZDV, 3NRTI after week-36)	Nevirapine	No	Mother
46	96	<	80	Viral load response	Female	C	2	-2.545	0.12536	12.5	1/2	No CD4 monitoring	Arm C (long-term ZDV, 3NRTI after week-36)	Nevirapine	No	Mother
46	120	<	80	Viral load response	Female	C	2	-2.545	0.12536	12.5	1/2	No CD4 monitoring	Arm C (long-term ZDV, 3NRTI after week-36)	Nevirapine	No	Mother
46	132	<	80	Viral load response	Female	C	2	-2.545	0.12536	12.5	1/2	No CD4 monitoring	Arm C (long-term ZDV, 3NRTI after week-36)	Nevirapine	No	Mother
46	144	<	80	Viral load response	Female	C	2	-2.545	0.12536	12.5	1/2	No CD4 monitoring	Arm C (long-term ZDV, 3NRTI after week-36)	Nevirapine	No	Mother
46	168	<	80	Viral load response	Female	C	2	-2.545	0.12536	12.5	1/2	No CD4 monitoring	Arm C (long-term ZDV, 3NRTI after week-36)	Nevirapine	No	Mother
46	180	<	80	Viral load response	Female	C	2	-2.545	0.12536	12.5	1/2	No CD4 monitoring	Arm C (long-term ZDV, 3NRTI after week-36)	Nevirapine	No	Mother
46	192	<	80	Viral load response	Female	C	2	-2.545	0.12536	12.5	1/2	No CD4 monitoring	Arm C (long-term ZDV, 3NRTI after week-36)	Nevirapine	No	Mother
46	204	<	80	Viral load response	Female	C	2	-2.545	0.12536	12.5	1/2	No CD4 monitoring	Arm C (long-term ZDV, 3NRTI after week-36)	Nevirapine	No	Mother
47	0	<	400	Baseline	Female	A	12	-4.07	-2.85254	23.5	3/4	No CD4 monitoring	Arm A (3TC/ABC/NNRTI throughout)	Efavirenz	No	Mother
47	4	=	571	Viral load response	Female	A	12	-4.07	-2.85254	23.5	3/4	No CD4 monitoring	Arm A (3TC/ABC/NNRTI throughout)	Efavirenz	No	Mother
47	24	<	80	Viral load response	Female	A	12	-4.07	-2.85254	23.5	3/4	No CD4 monitoring	Arm A (3TC/ABC/NNRTI throughout)	Efavirenz	No	Mother
47	36	<	80	Viral load response	Female	A	12	-4.07	-2.85254	23.5	3/4	No CD4 monitoring	Arm A (3TC/ABC/NNRTI throughout)	Efavirenz	No	Mother
47	48	<	80	Viral load response	Female	A	12	-4.07	-2.85254	23.5	3/4	No CD4 monitoring	Arm A (3TC/ABC/NNRTI throughout)	Efavirenz	No	Mother
47	72	<	80	Viral load response	Female	A	12	-4.07	-2.85254	23.5	3/4	No CD4 monitoring	Arm A (3TC/ABC/NNRTI throughout)	Efavirenz	No	Mother
47	120	<	80	Viral load response	Female	A	12	-4.07	-2.85254	23.5	3/4	No CD4 monitoring	Arm A (3TC/ABC/NNRTI throughout)	Efavirenz	No	Mother
47	144	<	80	Viral load response	Female	A	12	-4.07	-2.85254	23.5	3/4	No CD4 monitoring	Arm A (3TC/ABC/NNRTI throughout)	Efavirenz	No	Mother
47	168	<	80	Viral load response	Female	A	12	-4.07	-2.85254	23.5	3/4	No CD4 monitoring	Arm A (3TC/ABC/NNRTI throughout)	Efavirenz	No	Mother
47	192	<	80	Viral load response	Female	A	12	-4.07	-2.85254	23.5	3/4	No CD4 monitoring	Arm A (3TC/ABC/NNRTI throughout)	Efavirenz	No	Mother
48	0	=	5536	Baseline	Male	C	9	-1.7	-1.64323	24.5	1/2	No CD4 monitoring	Arm A (3TC/ABC/NNRTI throughout)	Efavirenz	No	Mother
48	4	<	80	Viral load response	Male	C	9	-1.7	-1.64323	24.5	1/2	No CD4 monitoring	Arm A (3TC/ABC/NNRTI throughout)	Efavirenz	No	Mother
48	24	<	80	Viral load response	Male	C	9	-1.7	-1.64323	24.5	1/2	No CD4 monitoring	Arm A (3TC/ABC/NNRTI throughout)	Efavirenz	No	Mother
48	36	<	80	Viral load response	Male	C	9	-1.7	-1.64323	24.5	1/2	No CD4 monitoring	Arm A (3TC/ABC/NNRTI throughout)	Efavirenz	No	Mother
48	48	<	80	Viral load response	Male	C	9	-1.7	-1.64323	24.5	1/2	No CD4 monitoring	Arm A (3TC/ABC/NNRTI throughout)	Efavirenz	No	Mother
48	72	<	80	Viral load response	Male	C	9	-1.7	-1.64323	24.5	1/2	No CD4 monitoring	Arm A (3TC/ABC/NNRTI throughout)	Efavirenz	No	Mother
48	96	<	80	Viral load response	Male	C	9	-1.7	-1.64323	24.5	1/2	No CD4 monitoring	Arm A (3TC/ABC/NNRTI throughout)	Efavirenz	No	Mother
48	120	<	80	Viral load response	Male	C	9	-1.7	-1.64323	24.5	1/2	No CD4 monitoring	Arm A (3TC/ABC/NNRTI throughout)	Efavirenz	No	Mother
48	144	<	80	Viral load response	Male	C	9	-1.7	-1.64323	24.5	1/2	No CD4 monitoring	Arm A (3TC/ABC/NNRTI throughout)	Efavirenz	No	Mother
48	168	<	80	Viral load response	Male	C	9	-1.7	-1.64323	24.5	1/2	No CD4 monitoring	Arm A (3TC/ABC/NNRTI throughout)	Efavirenz	No	Mother
48	192	<	80	Viral load response	Male	C	9	-1.7	-1.64323	24.5	1/2	No CD4 monitoring	Arm A (3TC/ABC/NNRTI throughout)	Efavirenz	No	Mother
48	216	<	80	Viral load response	Male	C	9	-1.7	-1.64323	24.5	1/2	No CD4 monitoring	Arm A (3TC/ABC/NNRTI throughout)	Efavirenz	No	Mother
49	0	=	147540	Baseline	Male	C	3	-4.2	-5.53042	0	3/4	CD4 monitoring	Arm A (3TC/ABC/NNRTI throughout)	Nevirapine	No	Mother
49	4	=	1070	Viral load response	Male	C	3	-4.2	-5.53042	0	3/4	CD4 monitoring	Arm A (3TC/ABC/NNRTI throughout)	Nevirapine	No	Mother
49	24	<	80	Viral load response	Male	C	3	-4.2	-5.53042	0	3/4	CD4 monitoring	Arm A (3TC/ABC/NNRTI throughout)	Nevirapine	No	Mother
49	36	<	80	Viral load response	Male	C	3	-4.2	-5.53042	0	3/4	CD4 monitoring	Arm A (3TC/ABC/NNRTI throughout)	Nevirapine	No	Mother
49	48	<	80	Viral load response	Male	C	3	-4.2	-5.53042	0	3/4	CD4 monitoring	Arm A (3TC/ABC/NNRTI throughout)	Nevirapine	No	Mother
49	72	<	80	Viral load response	Male	C	3	-4.2	-5.53042	0	3/4	CD4 monitoring	Arm A (3TC/ABC/NNRTI throughout)	Nevirapine	No	Mother
49	108	<	80	Viral load response	Male	C	3	-4.2	-5.53042	0	3/4	CD4 monitoring	Arm A (3TC/ABC/NNRTI throughout)	Nevirapine	No	Mother
49	132	<	80	Viral load response	Male	C	3	-4.2	-5.53042	0	3/4	CD4 monitoring	Arm A (3TC/ABC/NNRTI throughout)	Nevirapine	No	Mother
49	144	<	80	Viral load response	Male	C	3	-4.2	-5.53042	0	3/4	CD4 monitoring	Arm A (3TC/ABC/NNRTI throughout)	Nevirapine	No	Mother
49	168	<	80	Viral load response	Male	C	3	-4.2	-5.53042	0	3/4	CD4 monitoring	Arm A (3TC/ABC/NNRTI throughout)	Nevirapine	No	Mother
49	192	<	80	Viral load response	Male	C	3	-4.2	-5.53042	0	3/4	CD4 monitoring	Arm A (3TC/ABC/NNRTI throughout)	Nevirapine	No	Mother
49	216	<	80	Viral load response	Male	C	3	-4.2	-5.53042	0	3/4	CD4 monitoring	Arm A (3TC/ABC/NNRTI throughout)	Nevirapine	No	Mother
50	0	=	16304	Baseline	Male	D	5	-2.66	-2.39289	8.5	1/2	No CD4 monitoring	Arm A (3TC/ABC/NNRTI throughout)	Efavirenz	No	Other
50	4	<	80	Viral load response	Male	D	5	-2.66	-2.39289	8.5	1/2	No CD4 monitoring	Arm A (3TC/ABC/NNRTI throughout)	Efavirenz	No	Other
50	24	<	80	Viral load response	Male	D	5	-2.66	-2.39289	8.5	1/2	No CD4 monitoring	Arm A (3TC/ABC/NNRTI throughout)	Efavirenz	No	Other
50	36	<	80	Viral load response	Male	D	5	-2.66	-2.39289	8.5	1/2	No CD4 monitoring	Arm A (3TC/ABC/NNRTI throughout)	Efavirenz	No	Other
50	48	<	80	Viral load response	Male	D	5	-2.66	-2.39289	8.5	1/2	No CD4 monitoring	Arm A (3TC/ABC/NNRTI throughout)	Efavirenz	No	Other
51	0	=	158328	Baseline	Female	A	3	-3.695	-4.75764	0.75	3/4	No CD4 monitoring	Arm B (36 weeks ZDV)	Nevirapine	No	Mother
51	4	=	190	Viral load response	Female	A	3	-3.695	-4.75764	0.75	3/4	No CD4 monitoring	Arm B (36 weeks ZDV)	Nevirapine	No	Mother
51	24	<	80	Viral load response	Female	A	3	-3.695	-4.75764	0.75	3/4	No CD4 monitoring	Arm B (36 weeks ZDV)	Nevirapine	No	Mother
51	36	<	80	Viral load response	Female	A	3	-3.695	-4.75764	0.75	3/4	No CD4 monitoring	Arm B (36 weeks ZDV)	Nevirapine	No	Mother
51	48	<	80	Viral load response	Female	A	3	-3.695	-4.75764	0.75	3/4	No CD4 monitoring	Arm B (36 weeks ZDV)	Nevirapine	No	Mother
51	120	<	80	Viral load response	Female	A	3	-3.695	-4.75764	0.75	3/4	No CD4 monitoring	Arm B (36 weeks ZDV)	Nevirapine	No	Mother
51	144	<	80	Viral load response	Female	A	3	-3.695	-4.75764	0.75	3/4	No CD4 monitoring	Arm B (36 weeks ZDV)	Nevirapine	No	Mother
51	168	<	80	Viral load response	Female	A	3	-3.695	-4.75764	0.75	3/4	No CD4 monitoring	Arm B (36 weeks ZDV)	Nevirapine	No	Mother
51	180	<	80	Viral load response	Female	A	3	-3.695	-4.75764	0.75	3/4	No CD4 monitoring	Arm B (36 weeks ZDV)	Nevirapine	No	Mother
52	0	=	119722	Baseline	Female	D	3	-3.38	-2.62011	14	3/4	No CD4 monitoring	Arm B (36 weeks ZDV)	Nevirapine	No	Mother
52	4	=	662	Viral load response	Female	D	3	-3.38	-2.62011	14	3/4	No CD4 monitoring	Arm B (36 weeks ZDV)	Nevirapine	No	Mother
52	24	<	80	Viral load response	Female	D	3	-3.38	-2.62011	14	3/4	No CD4 monitoring	Arm B (36 weeks ZDV)	Nevirapine	No	Mother
52	36	<	80	Viral load response	Female	D	3	-3.38	-2.62011	14	3/4	No CD4 monitoring	Arm B (36 weeks ZDV)	Nevirapine	No	Mother
52	48	<	80	Viral load response	Female	D	3	-3.38	-2.62011	14	3/4	No CD4 monitoring	Arm B (36 weeks ZDV)	Nevirapine	No	Mother
52	60	<	80	Viral load response	Female	D	3	-3.38	-2.62011	14	3/4	No CD4 monitoring	Arm B (36 weeks ZDV)	Nevirapine	No	Mother
52	72	<	80	Viral load response	Female	D	3	-3.38	-2.62011	14	3/4	No CD4 monitoring	Arm B (36 weeks ZDV)	Nevirapine	No	Mother
52	96	<	80	Viral load response	Female	D	3	-3.38	-2.62011	14	3/4	No CD4 monitoring	Arm B (36 weeks ZDV)	Nevirapine	No	Mother
52	108	<	80	Viral load response	Female	D	3	-3.38	-2.62011	14	3/4	No CD4 monitoring	Arm B (36 weeks ZDV)	Nevirapine	No	Mother
52	120	<	80	Viral load response	Female	D	3	-3.38	-2.62011	14	3/4	No CD4 monitoring	Arm B (36 weeks ZDV)	Nevirapine	No	Mother
52	144	<	80	Viral load response	Female	D	3	-3.38	-2.62011	14	3/4	No CD4 monitoring	Arm B (36 weeks ZDV)	Nevirapine	No	Mother
52	156	<	80	Viral load response	Female	D	3	-3.38	-2.62011	14	3/4	No CD4 monitoring	Arm B (36 weeks ZDV)	Nevirapine	No	Mother
52	168	<	80	Viral load response	Female	D	3	-3.38	-2.62011	14	3/4	No CD4 monitoring	Arm B (36 weeks ZDV)	Nevirapine	No	Mother
52	192	<	80	Viral load response	Female	D	3	-3.38	-2.62011	14	3/4	No CD4 monitoring	Arm B (36 weeks ZDV)	Nevirapine	No	Mother
53	0	=	528568	Baseline	Female	B	0	-2.245	-4.32625	6	3/4	CD4 monitoring	Arm C (long-term ZDV, 3NRTI after week-36)	Nevirapine	No	Mother
53	4	=	368	Viral load response	Female	B	0	-2.245	-4.32625	6	3/4	CD4 monitoring	Arm C (long-term ZDV, 3NRTI after week-36)	Nevirapine	No	Mother
53	24	<	80	Viral load response	Female	B	0	-2.245	-4.32625	6	3/4	CD4 monitoring	Arm C (long-term ZDV, 3NRTI after week-36)	Nevirapine	No	Mother
53	36	<	80	Viral load response	Female	B	0	-2.245	-4.32625	6	3/4	CD4 monitoring	Arm C (long-term ZDV, 3NRTI after week-36)	Nevirapine	No	Mother
53	48	<	80	Viral load response	Female	B	0	-2.245	-4.32625	6	3/4	CD4 monitoring	Arm C (long-term ZDV, 3NRTI after week-36)	Nevirapine	No	Mother
53	72	<	80	Viral load response	Female	B	0	-2.245	-4.32625	6	3/4	CD4 monitoring	Arm C (long-term ZDV, 3NRTI after week-36)	Nevirapine	No	Mother
53	96	<	80	Viral load response	Female	B	0	-2.245	-4.32625	6	3/4	CD4 monitoring	Arm C (long-term ZDV, 3NRTI after week-36)	Nevirapine	No	Mother
53	120	<	80	Viral load response	Female	B	0	-2.245	-4.32625	6	3/4	CD4 monitoring	Arm C (long-term ZDV, 3NRTI after week-36)	Nevirapine	No	Mother
53	144	<	80	Viral load response	Female	B	0	-2.245	-4.32625	6	3/4	CD4 monitoring	Arm C (long-term ZDV, 3NRTI after week-36)	Nevirapine	No	Mother
53	168	<	80	Viral load response	Female	B	0	-2.245	-4.32625	6	3/4	CD4 monitoring	Arm C (long-term ZDV, 3NRTI after week-36)	Nevirapine	No	Mother
54	0	=	66994	Baseline	Female	B	7	-1.155	-1.9905	20	3/4	No CD4 monitoring	Arm C (long-term ZDV, 3NRTI after week-36)	Nevirapine	No	Mother
54	4	=	504	Viral load response	Female	B	7	-1.155	-1.9905	20	3/4	No CD4 monitoring	Arm C (long-term ZDV, 3NRTI after week-36)	Nevirapine	No	Mother
54	24	<	80	Viral load response	Female	B	7	-1.155	-1.9905	20	3/4	No CD4 monitoring	Arm C (long-term ZDV, 3NRTI after week-36)	Nevirapine	No	Mother
54	36	<	80	Viral load response	Female	B	7	-1.155	-1.9905	20	3/4	No CD4 monitoring	Arm C (long-term ZDV, 3NRTI after week-36)	Nevirapine	No	Mother
54	48	<	80	Viral load response	Female	B	7	-1.155	-1.9905	20	3/4	No CD4 monitoring	Arm C (long-term ZDV, 3NRTI after week-36)	Nevirapine	No	Mother
54	72	<	80	Viral load response	Female	B	7	-1.155	-1.9905	20	3/4	No CD4 monitoring	Arm C (long-term ZDV, 3NRTI after week-36)	Nevirapine	No	Mother
54	96	<	80	Viral load response	Female	B	7	-1.155	-1.9905	20	3/4	No CD4 monitoring	Arm C (long-term ZDV, 3NRTI after week-36)	Nevirapine	No	Mother
54	120	<	80	Viral load response	Female	B	7	-1.155	-1.9905	20	3/4	No CD4 monitoring	Arm C (long-term ZDV, 3NRTI after week-36)	Nevirapine	No	Mother
54	144	<	80	Viral load response	Female	B	7	-1.155	-1.9905	20	3/4	No CD4 monitoring	Arm C (long-term ZDV, 3NRTI after week-36)	Nevirapine	No	Mother
54	168	<	80	Viral load response	Female	B	7	-1.155	-1.9905	20	3/4	No CD4 monitoring	Arm C (long-term ZDV, 3NRTI after week-36)	Nevirapine	No	Mother
55	0	=	146302	Baseline	Male	B	9	-2.5	-3.89873	20	3/4	CD4 monitoring	Arm B (36 weeks ZDV)	Efavirenz	No	Mother
55	4	=	708	Viral load response	Male	B	9	-2.5	-3.89873	20	3/4	CD4 monitoring	Arm B (36 weeks ZDV)	Efavirenz	No	Mother
55	24	=	92	Viral load response	Male	B	9	-2.5	-3.89873	20	3/4	CD4 monitoring	Arm B (36 weeks ZDV)	Efavirenz	No	Mother
55	36	<	80	Viral load response	Male	B	9	-2.5	-3.89873	20	3/4	CD4 monitoring	Arm B (36 weeks ZDV)	Efavirenz	No	Mother
55	48	<	80	Viral load response	Male	B	9	-2.5	-3.89873	20	3/4	CD4 monitoring	Arm B (36 weeks ZDV)	Efavirenz	No	Mother
55	60	<	80	Viral load response	Male	B	9	-2.5	-3.89873	20	3/4	CD4 monitoring	Arm B (36 weeks ZDV)	Efavirenz	No	Mother
55	72	<	80	Viral load response	Male	B	9	-2.5	-3.89873	20	3/4	CD4 monitoring	Arm B (36 weeks ZDV)	Efavirenz	No	Mother
55	96	<	80	Viral load response	Male	B	9	-2.5	-3.89873	20	3/4	CD4 monitoring	Arm B (36 weeks ZDV)	Efavirenz	No	Mother
55	108	<	80	Viral load response	Male	B	9	-2.5	-3.89873	20	3/4	CD4 monitoring	Arm B (36 weeks ZDV)	Efavirenz	No	Mother
55	120	<	80	Viral load response	Male	B	9	-2.5	-3.89873	20	3/4	CD4 monitoring	Arm B (36 weeks ZDV)	Efavirenz	No	Mother
55	144	<	80	Viral load response	Male	B	9	-2.5	-3.89873	20	3/4	CD4 monitoring	Arm B (36 weeks ZDV)	Efavirenz	No	Mother
55	156	<	80	Viral load response	Male	B	9	-2.5	-3.89873	20	3/4	CD4 monitoring	Arm B (36 weeks ZDV)	Efavirenz	No	Mother
55	168	<	80	Viral load response	Male	B	9	-2.5	-3.89873	20	3/4	CD4 monitoring	Arm B (36 weeks ZDV)	Efavirenz	No	Mother
55	192	<	80	Viral load response	Male	B	9	-2.5	-3.89873	20	3/4	CD4 monitoring	Arm B (36 weeks ZDV)	Efavirenz	No	Mother
56	0	=	83036	Baseline	Male	D	3	-5.14	-5.57437	11.5	3/4	No CD4 monitoring	Arm B (36 weeks ZDV)	Nevirapine	No	Other
56	4	<	80	Viral load response	Male	D	3	-5.14	-5.57437	11.5	3/4	No CD4 monitoring	Arm B (36 weeks ZDV)	Nevirapine	No	Other
56	36	<	80	Viral load response	Male	D	3	-5.14	-5.57437	11.5	3/4	No CD4 monitoring	Arm B (36 weeks ZDV)	Nevirapine	No	Other
56	48	<	80	Viral load response	Male	D	3	-5.14	-5.57437	11.5	3/4	No CD4 monitoring	Arm B (36 weeks ZDV)	Nevirapine	No	Other
56	72	<	80	Viral load response	Male	D	3	-5.14	-5.57437	11.5	3/4	No CD4 monitoring	Arm B (36 weeks ZDV)	Nevirapine	No	Other
56	96	<	80	Viral load response	Male	D	3	-5.14	-5.57437	11.5	3/4	No CD4 monitoring	Arm B (36 weeks ZDV)	Nevirapine	No	Other
56	132	<	80	Viral load response	Male	D	3	-5.14	-5.57437	11.5	3/4	No CD4 monitoring	Arm B (36 weeks ZDV)	Nevirapine	No	Other
56	144	<	80	Viral load response	Male	D	3	-5.14	-5.57437	11.5	3/4	No CD4 monitoring	Arm B (36 weeks ZDV)	Nevirapine	No	Other
56	168	<	80	Viral load response	Male	D	3	-5.14	-5.57437	11.5	3/4	No CD4 monitoring	Arm B (36 weeks ZDV)	Nevirapine	No	Other
56	192	<	80	Viral load response	Male	D	3	-5.14	-5.57437	11.5	3/4	No CD4 monitoring	Arm B (36 weeks ZDV)	Nevirapine	No	Other
57	0	=	28662	Baseline	Male	C	13	-0.51	-0.279049	20	3/4	CD4 monitoring	Arm A (3TC/ABC/NNRTI throughout)	Efavirenz	No	Mother
57	4	<	80	Viral load response	Male	C	13	-0.51	-0.279049	20	3/4	CD4 monitoring	Arm A (3TC/ABC/NNRTI throughout)	Efavirenz	No	Mother
57	24	<	80	Viral load response	Male	C	13	-0.51	-0.279049	20	3/4	CD4 monitoring	Arm A (3TC/ABC/NNRTI throughout)	Efavirenz	No	Mother
57	36	<	80	Viral load response	Male	C	13	-0.51	-0.279049	20	3/4	CD4 monitoring	Arm A (3TC/ABC/NNRTI throughout)	Efavirenz	No	Mother
57	60	<	80	Viral load response	Male	C	13	-0.51	-0.279049	20	3/4	CD4 monitoring	Arm A (3TC/ABC/NNRTI throughout)	Efavirenz	No	Mother
57	72	<	80	Viral load response	Male	C	13	-0.51	-0.279049	20	3/4	CD4 monitoring	Arm A (3TC/ABC/NNRTI throughout)	Efavirenz	No	Mother
57	96	<	80	Viral load response	Male	C	13	-0.51	-0.279049	20	3/4	CD4 monitoring	Arm A (3TC/ABC/NNRTI throughout)	Efavirenz	No	Mother
57	120	<	80	Viral load response	Male	C	13	-0.51	-0.279049	20	3/4	CD4 monitoring	Arm A (3TC/ABC/NNRTI throughout)	Efavirenz	No	Mother
57	144	<	80	Viral load response	Male	C	13	-0.51	-0.279049	20	3/4	CD4 monitoring	Arm A (3TC/ABC/NNRTI throughout)	Efavirenz	No	Mother
57	168	<	80	Viral load response	Male	C	13	-0.51	-0.279049	20	3/4	CD4 monitoring	Arm A (3TC/ABC/NNRTI throughout)	Efavirenz	No	Mother
57	180	<	80	Viral load response	Male	C	13	-0.51	-0.279049	20	3/4	CD4 monitoring	Arm A (3TC/ABC/NNRTI throughout)	Efavirenz	No	Mother
57	204	<	80	Viral load response	Male	C	13	-0.51	-0.279049	20	3/4	CD4 monitoring	Arm A (3TC/ABC/NNRTI throughout)	Efavirenz	No	Mother
58	0	=	143080	Baseline	Female	A	15	-2.945	-5.39446	22	3/4	No CD4 monitoring	Arm C (long-term ZDV, 3NRTI after week-36)	Efavirenz	No	Other
58	4	=	980	Viral load response	Female	A	15	-2.945	-5.39446	22	3/4	No CD4 monitoring	Arm C (long-term ZDV, 3NRTI after week-36)	Efavirenz	No	Other
58	24	<	80	Viral load response	Female	A	15	-2.945	-5.39446	22	3/4	No CD4 monitoring	Arm C (long-term ZDV, 3NRTI after week-36)	Efavirenz	No	Other
58	36	<	80	Viral load response	Female	A	15	-2.945	-5.39446	22	3/4	No CD4 monitoring	Arm C (long-term ZDV, 3NRTI after week-36)	Efavirenz	No	Other
58	48	<	80	Viral load response	Female	A	15	-2.945	-5.39446	22	3/4	No CD4 monitoring	Arm C (long-term ZDV, 3NRTI after week-36)	Efavirenz	No	Other
58	72	<	80	Viral load response	Female	A	15	-2.945	-5.39446	22	3/4	No CD4 monitoring	Arm C (long-term ZDV, 3NRTI after week-36)	Efavirenz	No	Other
58	84	<	80	Viral load response	Female	A	15	-2.945	-5.39446	22	3/4	No CD4 monitoring	Arm C (long-term ZDV, 3NRTI after week-36)	Efavirenz	No	Other
58	96	<	80	Viral load response	Female	A	15	-2.945	-5.39446	22	3/4	No CD4 monitoring	Arm C (long-term ZDV, 3NRTI after week-36)	Efavirenz	No	Other
58	108	<	80	Viral load response	Female	A	15	-2.945	-5.39446	22	3/4	No CD4 monitoring	Arm C (long-term ZDV, 3NRTI after week-36)	Efavirenz	No	Other
58	120	<	80	Viral load response	Female	A	15	-2.945	-5.39446	22	3/4	No CD4 monitoring	Arm C (long-term ZDV, 3NRTI after week-36)	Efavirenz	No	Other
58	132	<	80	Viral load response	Female	A	15	-2.945	-5.39446	22	3/4	No CD4 monitoring	Arm C (long-term ZDV, 3NRTI after week-36)	Efavirenz	No	Other
58	144	<	80	Viral load response	Female	A	15	-2.945	-5.39446	22	3/4	No CD4 monitoring	Arm C (long-term ZDV, 3NRTI after week-36)	Efavirenz	No	Other
58	168	<	80	Viral load response	Female	A	15	-2.945	-5.39446	22	3/4	No CD4 monitoring	Arm C (long-term ZDV, 3NRTI after week-36)	Efavirenz	No	Other
58	180	<	80	Viral load response	Female	A	15	-2.945	-5.39446	22	3/4	No CD4 monitoring	Arm C (long-term ZDV, 3NRTI after week-36)	Efavirenz	No	Other
58	192	<	80	Viral load response	Female	A	15	-2.945	-5.39446	22	3/4	No CD4 monitoring	Arm C (long-term ZDV, 3NRTI after week-36)	Efavirenz	No	Other
59	0	=	768647	Baseline	Female	A	2	-3.495	-2.91889	5.65	3/4	CD4 monitoring	Arm A (3TC/ABC/NNRTI throughout)	Nevirapine	No	Mother
59	4	=	3339	Viral load response	Female	A	2	-3.495	-2.91889	5.65	3/4	CD4 monitoring	Arm A (3TC/ABC/NNRTI throughout)	Nevirapine	No	Mother
59	24	<	80	Viral load response	Female	A	2	-3.495	-2.91889	5.65	3/4	CD4 monitoring	Arm A (3TC/ABC/NNRTI throughout)	Nevirapine	No	Mother
59	36	<	80	Viral load response	Female	A	2	-3.495	-2.91889	5.65	3/4	CD4 monitoring	Arm A (3TC/ABC/NNRTI throughout)	Nevirapine	No	Mother
59	48	<	80	Viral load response	Female	A	2	-3.495	-2.91889	5.65	3/4	CD4 monitoring	Arm A (3TC/ABC/NNRTI throughout)	Nevirapine	No	Mother
59	72	<	80	Viral load response	Female	A	2	-3.495	-2.91889	5.65	3/4	CD4 monitoring	Arm A (3TC/ABC/NNRTI throughout)	Nevirapine	No	Mother
59	84	<	80	Viral load response	Female	A	2	-3.495	-2.91889	5.65	3/4	CD4 monitoring	Arm A (3TC/ABC/NNRTI throughout)	Nevirapine	No	Mother
59	108	<	80	Viral load response	Female	A	2	-3.495	-2.91889	5.65	3/4	CD4 monitoring	Arm A (3TC/ABC/NNRTI throughout)	Nevirapine	No	Mother
59	120	<	80	Viral load response	Female	A	2	-3.495	-2.91889	5.65	3/4	CD4 monitoring	Arm A (3TC/ABC/NNRTI throughout)	Nevirapine	No	Mother
59	132	<	80	Viral load response	Female	A	2	-3.495	-2.91889	5.65	3/4	CD4 monitoring	Arm A (3TC/ABC/NNRTI throughout)	Nevirapine	No	Mother
59	144	<	80	Viral load response	Female	A	2	-3.495	-2.91889	5.65	3/4	CD4 monitoring	Arm A (3TC/ABC/NNRTI throughout)	Nevirapine	No	Mother
59	168	<	80	Viral load response	Female	A	2	-3.495	-2.91889	5.65	3/4	CD4 monitoring	Arm A (3TC/ABC/NNRTI throughout)	Nevirapine	No	Mother
59	180	<	80	Viral load response	Female	A	2	-3.495	-2.91889	5.65	3/4	CD4 monitoring	Arm A (3TC/ABC/NNRTI throughout)	Nevirapine	No	Mother
59	192	<	80	Viral load response	Female	A	2	-3.495	-2.91889	5.65	3/4	CD4 monitoring	Arm A (3TC/ABC/NNRTI throughout)	Nevirapine	No	Mother
60	0	=	1918	Baseline	Female	B	11	-1.32	-1.59279	46	3/4	CD4 monitoring	Arm B (36 weeks ZDV)	Nevirapine	No	Other
60	4	<	80	Viral load response	Female	B	11	-1.32	-1.59279	46	3/4	CD4 monitoring	Arm B (36 weeks ZDV)	Nevirapine	No	Other
60	24	<	80	Viral load response	Female	B	11	-1.32	-1.59279	46	3/4	CD4 monitoring	Arm B (36 weeks ZDV)	Nevirapine	No	Other
60	36	<	80	Viral load response	Female	B	11	-1.32	-1.59279	46	3/4	CD4 monitoring	Arm B (36 weeks ZDV)	Nevirapine	No	Other
60	48	<	80	Viral load response	Female	B	11	-1.32	-1.59279	46	3/4	CD4 monitoring	Arm B (36 weeks ZDV)	Nevirapine	No	Other
60	72	<	80	Viral load response	Female	B	11	-1.32	-1.59279	46	3/4	CD4 monitoring	Arm B (36 weeks ZDV)	Nevirapine	No	Other
60	96	<	80	Viral load response	Female	B	11	-1.32	-1.59279	46	3/4	CD4 monitoring	Arm B (36 weeks ZDV)	Nevirapine	No	Other
60	120	<	80	Viral load response	Female	B	11	-1.32	-1.59279	46	3/4	CD4 monitoring	Arm B (36 weeks ZDV)	Nevirapine	No	Other
60	144	<	80	Viral load response	Female	B	11	-1.32	-1.59279	46	3/4	CD4 monitoring	Arm B (36 weeks ZDV)	Nevirapine	No	Other
60	168	<	80	Viral load response	Female	B	11	-1.32	-1.59279	46	3/4	CD4 monitoring	Arm B (36 weeks ZDV)	Nevirapine	No	Other
60	192	<	80	Viral load response	Female	B	11	-1.32	-1.59279	46	3/4	CD4 monitoring	Arm B (36 weeks ZDV)	Nevirapine	No	Other
61	0	=	43642	Baseline	Male	B	6	-1.125	-0.663478	32	3/4	CD4 monitoring	Arm C (long-term ZDV, 3NRTI after week-36)	Efavirenz	No	Mother
61	4	=	566	Viral load response	Male	B	6	-1.125	-0.663478	32	3/4	CD4 monitoring	Arm C (long-term ZDV, 3NRTI after week-36)	Efavirenz	No	Mother
61	24	<	80	Viral load response	Male	B	6	-1.125	-0.663478	32	3/4	CD4 monitoring	Arm C (long-term ZDV, 3NRTI after week-36)	Efavirenz	No	Mother
61	36	<	80	Viral load response	Male	B	6	-1.125	-0.663478	32	3/4	CD4 monitoring	Arm C (long-term ZDV, 3NRTI after week-36)	Efavirenz	No	Mother
61	48	<	80	Viral load response	Male	B	6	-1.125	-0.663478	32	3/4	CD4 monitoring	Arm C (long-term ZDV, 3NRTI after week-36)	Efavirenz	No	Mother
61	72	<	80	Viral load response	Male	B	6	-1.125	-0.663478	32	3/4	CD4 monitoring	Arm C (long-term ZDV, 3NRTI after week-36)	Efavirenz	No	Mother
61	84	<	80	Viral load response	Male	B	6	-1.125	-0.663478	32	3/4	CD4 monitoring	Arm C (long-term ZDV, 3NRTI after week-36)	Efavirenz	No	Mother
61	96	<	80	Viral load response	Male	B	6	-1.125	-0.663478	32	3/4	CD4 monitoring	Arm C (long-term ZDV, 3NRTI after week-36)	Efavirenz	No	Mother
61	120	<	80	Viral load response	Male	B	6	-1.125	-0.663478	32	3/4	CD4 monitoring	Arm C (long-term ZDV, 3NRTI after week-36)	Efavirenz	No	Mother
61	132	<	80	Viral load response	Male	B	6	-1.125	-0.663478	32	3/4	CD4 monitoring	Arm C (long-term ZDV, 3NRTI after week-36)	Efavirenz	No	Mother
61	144	<	80	Viral load response	Male	B	6	-1.125	-0.663478	32	3/4	CD4 monitoring	Arm C (long-term ZDV, 3NRTI after week-36)	Efavirenz	No	Mother
61	168	<	80	Viral load response	Male	B	6	-1.125	-0.663478	32	3/4	CD4 monitoring	Arm C (long-term ZDV, 3NRTI after week-36)	Efavirenz	No	Mother
61	180	<	80	Viral load response	Male	B	6	-1.125	-0.663478	32	3/4	CD4 monitoring	Arm C (long-term ZDV, 3NRTI after week-36)	Efavirenz	No	Mother
62	0	=	602334	Baseline	Female	C	11	-2.48	-1.82016	1	1/2	CD4 monitoring	Arm B (36 weeks ZDV)	Efavirenz	No	Other
62	4	=	530	Viral load response	Female	C	11	-2.48	-1.82016	1	1/2	CD4 monitoring	Arm B (36 weeks ZDV)	Efavirenz	No	Other
62	24	<	80	Viral load response	Female	C	11	-2.48	-1.82016	1	1/2	CD4 monitoring	Arm B (36 weeks ZDV)	Efavirenz	No	Other
62	36	<	80	Viral load response	Female	C	11	-2.48	-1.82016	1	1/2	CD4 monitoring	Arm B (36 weeks ZDV)	Efavirenz	No	Other
62	60	<	80	Viral load response	Female	C	11	-2.48	-1.82016	1	1/2	CD4 monitoring	Arm B (36 weeks ZDV)	Efavirenz	No	Other
62	72	<	80	Viral load response	Female	C	11	-2.48	-1.82016	1	1/2	CD4 monitoring	Arm B (36 weeks ZDV)	Efavirenz	No	Other
62	96	<	80	Viral load response	Female	C	11	-2.48	-1.82016	1	1/2	CD4 monitoring	Arm B (36 weeks ZDV)	Efavirenz	No	Other
62	120	<	80	Viral load response	Female	C	11	-2.48	-1.82016	1	1/2	CD4 monitoring	Arm B (36 weeks ZDV)	Efavirenz	No	Other
62	144	<	80	Viral load response	Female	C	11	-2.48	-1.82016	1	1/2	CD4 monitoring	Arm B (36 weeks ZDV)	Efavirenz	No	Other
62	168	<	80	Viral load response	Female	C	11	-2.48	-1.82016	1	1/2	CD4 monitoring	Arm B (36 weeks ZDV)	Efavirenz	No	Other
62	192	<	80	Viral load response	Female	C	11	-2.48	-1.82016	1	1/2	CD4 monitoring	Arm B (36 weeks ZDV)	Efavirenz	No	Other
63	0	=	139477	Baseline	Male	A	2	-2.39	-0.610861	15	3/4	No CD4 monitoring	Arm C (long-term ZDV, 3NRTI after week-36)	Nevirapine	No	Mother
63	4	=	3744	Viral load response	Male	A	2	-2.39	-0.610861	15	3/4	No CD4 monitoring	Arm C (long-term ZDV, 3NRTI after week-36)	Nevirapine	No	Mother
63	24	<	80	Viral load response	Male	A	2	-2.39	-0.610861	15	3/4	No CD4 monitoring	Arm C (long-term ZDV, 3NRTI after week-36)	Nevirapine	No	Mother
63	36	<	80	Viral load response	Male	A	2	-2.39	-0.610861	15	3/4	No CD4 monitoring	Arm C (long-term ZDV, 3NRTI after week-36)	Nevirapine	No	Mother
63	48	<	80	Viral load response	Male	A	2	-2.39	-0.610861	15	3/4	No CD4 monitoring	Arm C (long-term ZDV, 3NRTI after week-36)	Nevirapine	No	Mother
63	72	<	80	Viral load response	Male	A	2	-2.39	-0.610861	15	3/4	No CD4 monitoring	Arm C (long-term ZDV, 3NRTI after week-36)	Nevirapine	No	Mother
63	120	<	80	Viral load response	Male	A	2	-2.39	-0.610861	15	3/4	No CD4 monitoring	Arm C (long-term ZDV, 3NRTI after week-36)	Nevirapine	No	Mother
63	144	<	80	Viral load response	Male	A	2	-2.39	-0.610861	15	3/4	No CD4 monitoring	Arm C (long-term ZDV, 3NRTI after week-36)	Nevirapine	No	Mother
63	168	<	80	Viral load response	Male	A	2	-2.39	-0.610861	15	3/4	No CD4 monitoring	Arm C (long-term ZDV, 3NRTI after week-36)	Nevirapine	No	Mother
63	192	<	80	Viral load response	Male	A	2	-2.39	-0.610861	15	3/4	No CD4 monitoring	Arm C (long-term ZDV, 3NRTI after week-36)	Nevirapine	No	Mother
64	0	=	84466	Baseline	Male	C	8	0.7	0.251713	14	1/2	CD4 monitoring	Arm B (36 weeks ZDV)	Efavirenz	No	Other
64	4	=	300	Viral load response	Male	C	8	0.7	0.251713	14	1/2	CD4 monitoring	Arm B (36 weeks ZDV)	Efavirenz	No	Other
64	12	<	80	Viral load response	Male	C	8	0.7	0.251713	14	1/2	CD4 monitoring	Arm B (36 weeks ZDV)	Efavirenz	No	Other
64	36	<	80	Viral load response	Male	C	8	0.7	0.251713	14	1/2	CD4 monitoring	Arm B (36 weeks ZDV)	Efavirenz	No	Other
64	48	<	80	Viral load response	Male	C	8	0.7	0.251713	14	1/2	CD4 monitoring	Arm B (36 weeks ZDV)	Efavirenz	No	Other
64	72	<	80	Viral load response	Male	C	8	0.7	0.251713	14	1/2	CD4 monitoring	Arm B (36 weeks ZDV)	Efavirenz	No	Other
64	96	<	80	Viral load response	Male	C	8	0.7	0.251713	14	1/2	CD4 monitoring	Arm B (36 weeks ZDV)	Efavirenz	No	Other
64	120	<	80	Viral load response	Male	C	8	0.7	0.251713	14	1/2	CD4 monitoring	Arm B (36 weeks ZDV)	Efavirenz	No	Other
64	144	<	80	Viral load response	Male	C	8	0.7	0.251713	14	1/2	CD4 monitoring	Arm B (36 weeks ZDV)	Efavirenz	No	Other
64	168	<	80	Viral load response	Male	C	8	0.7	0.251713	14	1/2	CD4 monitoring	Arm B (36 weeks ZDV)	Efavirenz	No	Other
64	192	<	80	Viral load response	Male	C	8	0.7	0.251713	14	1/2	CD4 monitoring	Arm B (36 weeks ZDV)	Efavirenz	No	Other
64	216	<	80	Viral load response	Male	C	8	0.7	0.251713	14	1/2	CD4 monitoring	Arm B (36 weeks ZDV)	Efavirenz	No	Other
65	0	=	1091812	Baseline	Male	B	5	-1.56	-1.32701	33	3/4	CD4 monitoring	Arm C (long-term ZDV, 3NRTI after week-36)	Nevirapine	No	Mother
65	4	=	866	Viral load response	Male	B	5	-1.56	-1.32701	33	3/4	CD4 monitoring	Arm C (long-term ZDV, 3NRTI after week-36)	Nevirapine	No	Mother
65	24	<	80	Viral load response	Male	B	5	-1.56	-1.32701	33	3/4	CD4 monitoring	Arm C (long-term ZDV, 3NRTI after week-36)	Nevirapine	No	Mother
65	36	<	80	Viral load response	Male	B	5	-1.56	-1.32701	33	3/4	CD4 monitoring	Arm C (long-term ZDV, 3NRTI after week-36)	Nevirapine	No	Mother
65	48	<	80	Viral load response	Male	B	5	-1.56	-1.32701	33	3/4	CD4 monitoring	Arm C (long-term ZDV, 3NRTI after week-36)	Nevirapine	No	Mother
65	72	<	80	Viral load response	Male	B	5	-1.56	-1.32701	33	3/4	CD4 monitoring	Arm C (long-term ZDV, 3NRTI after week-36)	Nevirapine	No	Mother
65	96	<	80	Viral load response	Male	B	5	-1.56	-1.32701	33	3/4	CD4 monitoring	Arm C (long-term ZDV, 3NRTI after week-36)	Nevirapine	No	Mother
65	120	<	80	Viral load response	Male	B	5	-1.56	-1.32701	33	3/4	CD4 monitoring	Arm C (long-term ZDV, 3NRTI after week-36)	Nevirapine	No	Mother
65	132	<	80	Viral load response	Male	B	5	-1.56	-1.32701	33	3/4	CD4 monitoring	Arm C (long-term ZDV, 3NRTI after week-36)	Nevirapine	No	Mother
65	144	<	80	Viral load response	Male	B	5	-1.56	-1.32701	33	3/4	CD4 monitoring	Arm C (long-term ZDV, 3NRTI after week-36)	Nevirapine	No	Mother
65	168	<	80	Viral load response	Male	B	5	-1.56	-1.32701	33	3/4	CD4 monitoring	Arm C (long-term ZDV, 3NRTI after week-36)	Nevirapine	No	Mother
65	180	<	80	Viral load response	Male	B	5	-1.56	-1.32701	33	3/4	CD4 monitoring	Arm C (long-term ZDV, 3NRTI after week-36)	Nevirapine	No	Mother
66	0	=	1169007	Baseline	Male	A	5	-1.135	-0.786972	12.5	1/2	CD4 monitoring	Arm B (36 weeks ZDV)	Efavirenz	No	Mother
66	4	=	341	Viral load response	Male	A	5	-1.135	-0.786972	12.5	1/2	CD4 monitoring	Arm B (36 weeks ZDV)	Efavirenz	No	Mother
66	24	<	80	Viral load response	Male	A	5	-1.135	-0.786972	12.5	1/2	CD4 monitoring	Arm B (36 weeks ZDV)	Efavirenz	No	Mother
66	36	<	80	Viral load response	Male	A	5	-1.135	-0.786972	12.5	1/2	CD4 monitoring	Arm B (36 weeks ZDV)	Efavirenz	No	Mother
66	48	<	80	Viral load response	Male	A	5	-1.135	-0.786972	12.5	1/2	CD4 monitoring	Arm B (36 weeks ZDV)	Efavirenz	No	Mother
66	72	<	80	Viral load response	Male	A	5	-1.135	-0.786972	12.5	1/2	CD4 monitoring	Arm B (36 weeks ZDV)	Efavirenz	No	Mother
66	96	<	80	Viral load response	Male	A	5	-1.135	-0.786972	12.5	1/2	CD4 monitoring	Arm B (36 weeks ZDV)	Efavirenz	No	Mother
66	120	<	80	Viral load response	Male	A	5	-1.135	-0.786972	12.5	1/2	CD4 monitoring	Arm B (36 weeks ZDV)	Efavirenz	No	Mother
66	144	<	80	Viral load response	Male	A	5	-1.135	-0.786972	12.5	1/2	CD4 monitoring	Arm B (36 weeks ZDV)	Efavirenz	No	Mother
66	168	<	80	Viral load response	Male	A	5	-1.135	-0.786972	12.5	1/2	CD4 monitoring	Arm B (36 weeks ZDV)	Efavirenz	No	Mother
66	192	<	80	Viral load response	Male	A	5	-1.135	-0.786972	12.5	1/2	CD4 monitoring	Arm B (36 weeks ZDV)	Efavirenz	No	Mother
67	0	=	16868	Baseline	Female	A	5	-0.785	-0.77105	12.5	3/4	No CD4 monitoring	Arm B (36 weeks ZDV)	Nevirapine	No	Mother
67	4	=	216	Viral load response	Female	A	5	-0.785	-0.77105	12.5	3/4	No CD4 monitoring	Arm B (36 weeks ZDV)	Nevirapine	No	Mother
67	24	<	80	Viral load response	Female	A	5	-0.785	-0.77105	12.5	3/4	No CD4 monitoring	Arm B (36 weeks ZDV)	Nevirapine	No	Mother
67	36	<	80	Viral load response	Female	A	5	-0.785	-0.77105	12.5	3/4	No CD4 monitoring	Arm B (36 weeks ZDV)	Nevirapine	No	Mother
67	48	<	80	Viral load response	Female	A	5	-0.785	-0.77105	12.5	3/4	No CD4 monitoring	Arm B (36 weeks ZDV)	Nevirapine	No	Mother
67	72	<	80	Viral load response	Female	A	5	-0.785	-0.77105	12.5	3/4	No CD4 monitoring	Arm B (36 weeks ZDV)	Nevirapine	No	Mother
67	120	<	80	Viral load response	Female	A	5	-0.785	-0.77105	12.5	3/4	No CD4 monitoring	Arm B (36 weeks ZDV)	Nevirapine	No	Mother
67	144	<	80	Viral load response	Female	A	5	-0.785	-0.77105	12.5	3/4	No CD4 monitoring	Arm B (36 weeks ZDV)	Nevirapine	No	Mother
67	168	<	80	Viral load response	Female	A	5	-0.785	-0.77105	12.5	3/4	No CD4 monitoring	Arm B (36 weeks ZDV)	Nevirapine	No	Mother
67	192	<	80	Viral load response	Female	A	5	-0.785	-0.77105	12.5	3/4	No CD4 monitoring	Arm B (36 weeks ZDV)	Nevirapine	No	Mother
68	0	=	57772	Baseline	Female	A	9	-1.71	-0.683206	8.5	3/4	No CD4 monitoring	Arm A (3TC/ABC/NNRTI throughout)	Efavirenz	No	Other
68	4	=	85	Viral load response	Female	A	9	-1.71	-0.683206	8.5	3/4	No CD4 monitoring	Arm A (3TC/ABC/NNRTI throughout)	Efavirenz	No	Other
68	24	<	80	Viral load response	Female	A	9	-1.71	-0.683206	8.5	3/4	No CD4 monitoring	Arm A (3TC/ABC/NNRTI throughout)	Efavirenz	No	Other
68	36	<	80	Viral load response	Female	A	9	-1.71	-0.683206	8.5	3/4	No CD4 monitoring	Arm A (3TC/ABC/NNRTI throughout)	Efavirenz	No	Other
68	48	<	80	Viral load response	Female	A	9	-1.71	-0.683206	8.5	3/4	No CD4 monitoring	Arm A (3TC/ABC/NNRTI throughout)	Efavirenz	No	Other
68	72	<	80	Viral load response	Female	A	9	-1.71	-0.683206	8.5	3/4	No CD4 monitoring	Arm A (3TC/ABC/NNRTI throughout)	Efavirenz	No	Other
68	96	<	80	Viral load response	Female	A	9	-1.71	-0.683206	8.5	3/4	No CD4 monitoring	Arm A (3TC/ABC/NNRTI throughout)	Efavirenz	No	Other
68	132	<	80	Viral load response	Female	A	9	-1.71	-0.683206	8.5	3/4	No CD4 monitoring	Arm A (3TC/ABC/NNRTI throughout)	Efavirenz	No	Other
68	168	<	80	Viral load response	Female	A	9	-1.71	-0.683206	8.5	3/4	No CD4 monitoring	Arm A (3TC/ABC/NNRTI throughout)	Efavirenz	No	Other
68	180	<	80	Viral load response	Female	A	9	-1.71	-0.683206	8.5	3/4	No CD4 monitoring	Arm A (3TC/ABC/NNRTI throughout)	Efavirenz	No	Other
69	0	=	7510	Baseline	Female	D	2	-2.27	-2.62729	20.5	1/2	No CD4 monitoring	Arm A (3TC/ABC/NNRTI throughout)	Nevirapine	No	Mother
69	4	=	850	Viral load response	Female	D	2	-2.27	-2.62729	20.5	1/2	No CD4 monitoring	Arm A (3TC/ABC/NNRTI throughout)	Nevirapine	No	Mother
69	24	<	80	Viral load response	Female	D	2	-2.27	-2.62729	20.5	1/2	No CD4 monitoring	Arm A (3TC/ABC/NNRTI throughout)	Nevirapine	No	Mother
69	36	<	80	Viral load response	Female	D	2	-2.27	-2.62729	20.5	1/2	No CD4 monitoring	Arm A (3TC/ABC/NNRTI throughout)	Nevirapine	No	Mother
69	48	<	80	Viral load response	Female	D	2	-2.27	-2.62729	20.5	1/2	No CD4 monitoring	Arm A (3TC/ABC/NNRTI throughout)	Nevirapine	No	Mother
69	72	<	80	Viral load response	Female	D	2	-2.27	-2.62729	20.5	1/2	No CD4 monitoring	Arm A (3TC/ABC/NNRTI throughout)	Nevirapine	No	Mother
69	96	<	80	Viral load response	Female	D	2	-2.27	-2.62729	20.5	1/2	No CD4 monitoring	Arm A (3TC/ABC/NNRTI throughout)	Nevirapine	No	Mother
69	132	<	80	Viral load response	Female	D	2	-2.27	-2.62729	20.5	1/2	No CD4 monitoring	Arm A (3TC/ABC/NNRTI throughout)	Nevirapine	No	Mother
69	144	<	80	Viral load response	Female	D	2	-2.27	-2.62729	20.5	1/2	No CD4 monitoring	Arm A (3TC/ABC/NNRTI throughout)	Nevirapine	No	Mother
69	168	<	80	Viral load response	Female	D	2	-2.27	-2.62729	20.5	1/2	No CD4 monitoring	Arm A (3TC/ABC/NNRTI throughout)	Nevirapine	No	Mother
69	192	<	80	Viral load response	Female	D	2	-2.27	-2.62729	20.5	1/2	No CD4 monitoring	Arm A (3TC/ABC/NNRTI throughout)	Nevirapine	No	Mother
70	0	=	6584	Baseline	Female	C	3	-2.38	-1.05024	28.5	1/2	CD4 monitoring	Arm B (36 weeks ZDV)	Efavirenz	No	Other
70	4	<	80	Viral load response	Female	C	3	-2.38	-1.05024	28.5	1/2	CD4 monitoring	Arm B (36 weeks ZDV)	Efavirenz	No	Other
70	24	<	80	Viral load response	Female	C	3	-2.38	-1.05024	28.5	1/2	CD4 monitoring	Arm B (36 weeks ZDV)	Efavirenz	No	Other
70	36	<	80	Viral load response	Female	C	3	-2.38	-1.05024	28.5	1/2	CD4 monitoring	Arm B (36 weeks ZDV)	Efavirenz	No	Other
70	48	<	80	Viral load response	Female	C	3	-2.38	-1.05024	28.5	1/2	CD4 monitoring	Arm B (36 weeks ZDV)	Efavirenz	No	Other
70	72	<	80	Viral load response	Female	C	3	-2.38	-1.05024	28.5	1/2	CD4 monitoring	Arm B (36 weeks ZDV)	Efavirenz	No	Other
70	96	<	80	Viral load response	Female	C	3	-2.38	-1.05024	28.5	1/2	CD4 monitoring	Arm B (36 weeks ZDV)	Efavirenz	No	Other
70	120	<	80	Viral load response	Female	C	3	-2.38	-1.05024	28.5	1/2	CD4 monitoring	Arm B (36 weeks ZDV)	Efavirenz	No	Other
70	144	<	80	Viral load response	Female	C	3	-2.38	-1.05024	28.5	1/2	CD4 monitoring	Arm B (36 weeks ZDV)	Efavirenz	No	Other
70	168	<	80	Viral load response	Female	C	3	-2.38	-1.05024	28.5	1/2	CD4 monitoring	Arm B (36 weeks ZDV)	Efavirenz	No	Other
70	192	<	80	Viral load response	Female	C	3	-2.38	-1.05024	28.5	1/2	CD4 monitoring	Arm B (36 weeks ZDV)	Efavirenz	No	Other
70	216	<	80	Viral load response	Female	C	3	-2.38	-1.05024	28.5	1/2	CD4 monitoring	Arm B (36 weeks ZDV)	Efavirenz	No	Other
71	0	=	156792	Baseline	Male	C	15	-2.435	-2.00487	6.5	1/2	CD4 monitoring	Arm A (3TC/ABC/NNRTI throughout)	Efavirenz	No	Other
71	4	=	180	Viral load response	Male	C	15	-2.435	-2.00487	6.5	1/2	CD4 monitoring	Arm A (3TC/ABC/NNRTI throughout)	Efavirenz	No	Other
71	24	<	80	Viral load response	Male	C	15	-2.435	-2.00487	6.5	1/2	CD4 monitoring	Arm A (3TC/ABC/NNRTI throughout)	Efavirenz	No	Other
71	36	<	80	Viral load response	Male	C	15	-2.435	-2.00487	6.5	1/2	CD4 monitoring	Arm A (3TC/ABC/NNRTI throughout)	Efavirenz	No	Other
71	48	<	80	Viral load response	Male	C	15	-2.435	-2.00487	6.5	1/2	CD4 monitoring	Arm A (3TC/ABC/NNRTI throughout)	Efavirenz	No	Other
71	72	<	80	Viral load response	Male	C	15	-2.435	-2.00487	6.5	1/2	CD4 monitoring	Arm A (3TC/ABC/NNRTI throughout)	Efavirenz	No	Other
71	96	<	80	Viral load response	Male	C	15	-2.435	-2.00487	6.5	1/2	CD4 monitoring	Arm A (3TC/ABC/NNRTI throughout)	Efavirenz	No	Other
71	120	<	80	Viral load response	Male	C	15	-2.435	-2.00487	6.5	1/2	CD4 monitoring	Arm A (3TC/ABC/NNRTI throughout)	Efavirenz	No	Other
71	144	<	80	Viral load response	Male	C	15	-2.435	-2.00487	6.5	1/2	CD4 monitoring	Arm A (3TC/ABC/NNRTI throughout)	Efavirenz	No	Other
71	168	<	80	Viral load response	Male	C	15	-2.435	-2.00487	6.5	1/2	CD4 monitoring	Arm A (3TC/ABC/NNRTI throughout)	Efavirenz	No	Other
71	192	<	80	Viral load response	Male	C	15	-2.435	-2.00487	6.5	1/2	CD4 monitoring	Arm A (3TC/ABC/NNRTI throughout)	Efavirenz	No	Other
71	216	<	80	Viral load response	Male	C	15	-2.435	-2.00487	6.5	1/2	CD4 monitoring	Arm A (3TC/ABC/NNRTI throughout)	Efavirenz	No	Other
72	0	=	56560	Baseline	Male	C	15	-1.785	-0.872535	23.5	1/2	CD4 monitoring	Arm B (36 weeks ZDV)	Efavirenz	No	Other
72	4	<	80	Viral load response	Male	C	15	-1.785	-0.872535	23.5	1/2	CD4 monitoring	Arm B (36 weeks ZDV)	Efavirenz	No	Other
72	24	<	80	Viral load response	Male	C	15	-1.785	-0.872535	23.5	1/2	CD4 monitoring	Arm B (36 weeks ZDV)	Efavirenz	No	Other
72	36	<	80	Viral load response	Male	C	15	-1.785	-0.872535	23.5	1/2	CD4 monitoring	Arm B (36 weeks ZDV)	Efavirenz	No	Other
72	48	<	80	Viral load response	Male	C	15	-1.785	-0.872535	23.5	1/2	CD4 monitoring	Arm B (36 weeks ZDV)	Efavirenz	No	Other
72	72	<	80	Viral load response	Male	C	15	-1.785	-0.872535	23.5	1/2	CD4 monitoring	Arm B (36 weeks ZDV)	Efavirenz	No	Other
72	96	<	80	Viral load response	Male	C	15	-1.785	-0.872535	23.5	1/2	CD4 monitoring	Arm B (36 weeks ZDV)	Efavirenz	No	Other
72	120	<	80	Viral load response	Male	C	15	-1.785	-0.872535	23.5	1/2	CD4 monitoring	Arm B (36 weeks ZDV)	Efavirenz	No	Other
72	144	<	80	Viral load response	Male	C	15	-1.785	-0.872535	23.5	1/2	CD4 monitoring	Arm B (36 weeks ZDV)	Efavirenz	No	Other
72	168	<	80	Viral load response	Male	C	15	-1.785	-0.872535	23.5	1/2	CD4 monitoring	Arm B (36 weeks ZDV)	Efavirenz	No	Other
72	180	<	80	Viral load response	Male	C	15	-1.785	-0.872535	23.5	1/2	CD4 monitoring	Arm B (36 weeks ZDV)	Efavirenz	No	Other
72	204	<	80	Viral load response	Male	C	15	-1.785	-0.872535	23.5	1/2	CD4 monitoring	Arm B (36 weeks ZDV)	Efavirenz	No	Other
73	0	=	226326	Baseline	Male	D	5	-0.145	-2.57623	1.5	3/4	No CD4 monitoring	Arm B (36 weeks ZDV)	Efavirenz	No	Mother
73	4	<	80	Viral load response	Male	D	5	-0.145	-2.57623	1.5	3/4	No CD4 monitoring	Arm B (36 weeks ZDV)	Efavirenz	No	Mother
73	24	<	80	Viral load response	Male	D	5	-0.145	-2.57623	1.5	3/4	No CD4 monitoring	Arm B (36 weeks ZDV)	Efavirenz	No	Mother
73	36	<	80	Viral load response	Male	D	5	-0.145	-2.57623	1.5	3/4	No CD4 monitoring	Arm B (36 weeks ZDV)	Efavirenz	No	Mother
73	48	<	80	Viral load response	Male	D	5	-0.145	-2.57623	1.5	3/4	No CD4 monitoring	Arm B (36 weeks ZDV)	Efavirenz	No	Mother
73	72	<	80	Viral load response	Male	D	5	-0.145	-2.57623	1.5	3/4	No CD4 monitoring	Arm B (36 weeks ZDV)	Efavirenz	No	Mother
73	96	<	80	Viral load response	Male	D	5	-0.145	-2.57623	1.5	3/4	No CD4 monitoring	Arm B (36 weeks ZDV)	Efavirenz	No	Mother
73	120	<	80	Viral load response	Male	D	5	-0.145	-2.57623	1.5	3/4	No CD4 monitoring	Arm B (36 weeks ZDV)	Efavirenz	No	Mother
73	144	<	80	Viral load response	Male	D	5	-0.145	-2.57623	1.5	3/4	No CD4 monitoring	Arm B (36 weeks ZDV)	Efavirenz	No	Mother
73	168	<	80	Viral load response	Male	D	5	-0.145	-2.57623	1.5	3/4	No CD4 monitoring	Arm B (36 weeks ZDV)	Efavirenz	No	Mother
73	192	<	80	Viral load response	Male	D	5	-0.145	-2.57623	1.5	3/4	No CD4 monitoring	Arm B (36 weeks ZDV)	Efavirenz	No	Mother
74	0	=	45142	Baseline	Male	B	14	-2.54	-3.04242	11.5	3/4	CD4 monitoring	Arm C (long-term ZDV, 3NRTI after week-36)	Efavirenz	No	Mother
74	4	=	350	Viral load response	Male	B	14	-2.54	-3.04242	11.5	3/4	CD4 monitoring	Arm C (long-term ZDV, 3NRTI after week-36)	Efavirenz	No	Mother
74	24	<	80	Viral load response	Male	B	14	-2.54	-3.04242	11.5	3/4	CD4 monitoring	Arm C (long-term ZDV, 3NRTI after week-36)	Efavirenz	No	Mother
74	36	<	80	Viral load response	Male	B	14	-2.54	-3.04242	11.5	3/4	CD4 monitoring	Arm C (long-term ZDV, 3NRTI after week-36)	Efavirenz	No	Mother
74	48	<	80	Viral load response	Male	B	14	-2.54	-3.04242	11.5	3/4	CD4 monitoring	Arm C (long-term ZDV, 3NRTI after week-36)	Efavirenz	No	Mother
74	72	<	80	Viral load response	Male	B	14	-2.54	-3.04242	11.5	3/4	CD4 monitoring	Arm C (long-term ZDV, 3NRTI after week-36)	Efavirenz	No	Mother
74	96	<	80	Viral load response	Male	B	14	-2.54	-3.04242	11.5	3/4	CD4 monitoring	Arm C (long-term ZDV, 3NRTI after week-36)	Efavirenz	No	Mother
74	120	<	80	Viral load response	Male	B	14	-2.54	-3.04242	11.5	3/4	CD4 monitoring	Arm C (long-term ZDV, 3NRTI after week-36)	Efavirenz	No	Mother
74	144	<	80	Viral load response	Male	B	14	-2.54	-3.04242	11.5	3/4	CD4 monitoring	Arm C (long-term ZDV, 3NRTI after week-36)	Efavirenz	No	Mother
74	168	<	80	Viral load response	Male	B	14	-2.54	-3.04242	11.5	3/4	CD4 monitoring	Arm C (long-term ZDV, 3NRTI after week-36)	Efavirenz	No	Mother
75	0	=	168964	Baseline	Male	D	7	-3.87	-4.24154	7	1/2	No CD4 monitoring	Arm A (3TC/ABC/NNRTI throughout)	Efavirenz	No	Other
75	4	=	650	Viral load response	Male	D	7	-3.87	-4.24154	7	1/2	No CD4 monitoring	Arm A (3TC/ABC/NNRTI throughout)	Efavirenz	No	Other
75	24	<	80	Viral load response	Male	D	7	-3.87	-4.24154	7	1/2	No CD4 monitoring	Arm A (3TC/ABC/NNRTI throughout)	Efavirenz	No	Other
75	36	<	80	Viral load response	Male	D	7	-3.87	-4.24154	7	1/2	No CD4 monitoring	Arm A (3TC/ABC/NNRTI throughout)	Efavirenz	No	Other
75	48	<	80	Viral load response	Male	D	7	-3.87	-4.24154	7	1/2	No CD4 monitoring	Arm A (3TC/ABC/NNRTI throughout)	Efavirenz	No	Other
75	72	<	80	Viral load response	Male	D	7	-3.87	-4.24154	7	1/2	No CD4 monitoring	Arm A (3TC/ABC/NNRTI throughout)	Efavirenz	No	Other
75	96	<	80	Viral load response	Male	D	7	-3.87	-4.24154	7	1/2	No CD4 monitoring	Arm A (3TC/ABC/NNRTI throughout)	Efavirenz	No	Other
75	120	<	80	Viral load response	Male	D	7	-3.87	-4.24154	7	1/2	No CD4 monitoring	Arm A (3TC/ABC/NNRTI throughout)	Efavirenz	No	Other
75	144	<	80	Viral load response	Male	D	7	-3.87	-4.24154	7	1/2	No CD4 monitoring	Arm A (3TC/ABC/NNRTI throughout)	Efavirenz	No	Other
75	168	<	80	Viral load response	Male	D	7	-3.87	-4.24154	7	1/2	No CD4 monitoring	Arm A (3TC/ABC/NNRTI throughout)	Efavirenz	No	Other
75	192	<	80	Viral load response	Male	D	7	-3.87	-4.24154	7	1/2	No CD4 monitoring	Arm A (3TC/ABC/NNRTI throughout)	Efavirenz	No	Other
76	0	=	335211	Baseline	Male	A	6	-2.555	-2.72357	0.2	3/4	No CD4 monitoring	Arm B (36 weeks ZDV)	Nevirapine	No	Mother
76	24	<	80	Viral load response	Male	A	6	-2.555	-2.72357	0.2	3/4	No CD4 monitoring	Arm B (36 weeks ZDV)	Nevirapine	No	Mother
76	36	<	80	Viral load response	Male	A	6	-2.555	-2.72357	0.2	3/4	No CD4 monitoring	Arm B (36 weeks ZDV)	Nevirapine	No	Mother
76	48	<	80	Viral load response	Male	A	6	-2.555	-2.72357	0.2	3/4	No CD4 monitoring	Arm B (36 weeks ZDV)	Nevirapine	No	Mother
76	72	<	80	Viral load response	Male	A	6	-2.555	-2.72357	0.2	3/4	No CD4 monitoring	Arm B (36 weeks ZDV)	Nevirapine	No	Mother
76	96	<	80	Viral load response	Male	A	6	-2.555	-2.72357	0.2	3/4	No CD4 monitoring	Arm B (36 weeks ZDV)	Nevirapine	No	Mother
76	108	<	80	Viral load response	Male	A	6	-2.555	-2.72357	0.2	3/4	No CD4 monitoring	Arm B (36 weeks ZDV)	Nevirapine	No	Mother
76	120	<	80	Viral load response	Male	A	6	-2.555	-2.72357	0.2	3/4	No CD4 monitoring	Arm B (36 weeks ZDV)	Nevirapine	No	Mother
76	132	<	80	Viral load response	Male	A	6	-2.555	-2.72357	0.2	3/4	No CD4 monitoring	Arm B (36 weeks ZDV)	Nevirapine	No	Mother
76	144	<	80	Viral load response	Male	A	6	-2.555	-2.72357	0.2	3/4	No CD4 monitoring	Arm B (36 weeks ZDV)	Nevirapine	No	Mother
76	168	<	80	Viral load response	Male	A	6	-2.555	-2.72357	0.2	3/4	No CD4 monitoring	Arm B (36 weeks ZDV)	Nevirapine	No	Mother
76	192	<	80	Viral load response	Male	A	6	-2.555	-2.72357	0.2	3/4	No CD4 monitoring	Arm B (36 weeks ZDV)	Nevirapine	No	Mother
77	0	=	66994	Baseline	Female	B	6	-1.13	-2.0538	25	3/4	No CD4 monitoring	Arm C (long-term ZDV, 3NRTI after week-36)	Nevirapine	No	Mother
77	4	=	200	Viral load response	Female	B	6	-1.13	-2.0538	25	3/4	No CD4 monitoring	Arm C (long-term ZDV, 3NRTI after week-36)	Nevirapine	No	Mother
77	24	<	80	Viral load response	Female	B	6	-1.13	-2.0538	25	3/4	No CD4 monitoring	Arm C (long-term ZDV, 3NRTI after week-36)	Nevirapine	No	Mother
77	36	<	80	Viral load response	Female	B	6	-1.13	-2.0538	25	3/4	No CD4 monitoring	Arm C (long-term ZDV, 3NRTI after week-36)	Nevirapine	No	Mother
77	48	<	80	Viral load response	Female	B	6	-1.13	-2.0538	25	3/4	No CD4 monitoring	Arm C (long-term ZDV, 3NRTI after week-36)	Nevirapine	No	Mother
77	72	<	80	Viral load response	Female	B	6	-1.13	-2.0538	25	3/4	No CD4 monitoring	Arm C (long-term ZDV, 3NRTI after week-36)	Nevirapine	No	Mother
77	96	<	80	Viral load response	Female	B	6	-1.13	-2.0538	25	3/4	No CD4 monitoring	Arm C (long-term ZDV, 3NRTI after week-36)	Nevirapine	No	Mother
77	144	<	80	Viral load response	Female	B	6	-1.13	-2.0538	25	3/4	No CD4 monitoring	Arm C (long-term ZDV, 3NRTI after week-36)	Nevirapine	No	Mother
77	168	<	80	Viral load response	Female	B	6	-1.13	-2.0538	25	3/4	No CD4 monitoring	Arm C (long-term ZDV, 3NRTI after week-36)	Nevirapine	No	Mother
77	180	<	80	Viral load response	Female	B	6	-1.13	-2.0538	25	3/4	No CD4 monitoring	Arm C (long-term ZDV, 3NRTI after week-36)	Nevirapine	No	Mother
78	0	=	46758	Baseline	Female	D	7	0.46	-0.0414222	6.5	3/4	No CD4 monitoring	Arm C (long-term ZDV, 3NRTI after week-36)	Efavirenz	No	Other
78	4	=	466	Viral load response	Female	D	7	0.46	-0.0414222	6.5	3/4	No CD4 monitoring	Arm C (long-term ZDV, 3NRTI after week-36)	Efavirenz	No	Other
78	36	<	80	Viral load response	Female	D	7	0.46	-0.0414222	6.5	3/4	No CD4 monitoring	Arm C (long-term ZDV, 3NRTI after week-36)	Efavirenz	No	Other
78	48	<	80	Viral load response	Female	D	7	0.46	-0.0414222	6.5	3/4	No CD4 monitoring	Arm C (long-term ZDV, 3NRTI after week-36)	Efavirenz	No	Other
78	72	<	80	Viral load response	Female	D	7	0.46	-0.0414222	6.5	3/4	No CD4 monitoring	Arm C (long-term ZDV, 3NRTI after week-36)	Efavirenz	No	Other
78	84	<	80	Viral load response	Female	D	7	0.46	-0.0414222	6.5	3/4	No CD4 monitoring	Arm C (long-term ZDV, 3NRTI after week-36)	Efavirenz	No	Other
78	96	<	80	Viral load response	Female	D	7	0.46	-0.0414222	6.5	3/4	No CD4 monitoring	Arm C (long-term ZDV, 3NRTI after week-36)	Efavirenz	No	Other
78	120	<	80	Viral load response	Female	D	7	0.46	-0.0414222	6.5	3/4	No CD4 monitoring	Arm C (long-term ZDV, 3NRTI after week-36)	Efavirenz	No	Other
78	132	<	80	Viral load response	Female	D	7	0.46	-0.0414222	6.5	3/4	No CD4 monitoring	Arm C (long-term ZDV, 3NRTI after week-36)	Efavirenz	No	Other
78	144	<	80	Viral load response	Female	D	7	0.46	-0.0414222	6.5	3/4	No CD4 monitoring	Arm C (long-term ZDV, 3NRTI after week-36)	Efavirenz	No	Other
78	168	<	80	Viral load response	Female	D	7	0.46	-0.0414222	6.5	3/4	No CD4 monitoring	Arm C (long-term ZDV, 3NRTI after week-36)	Efavirenz	No	Other
79	0	=	1824022	Baseline	Male	B	2	-4.035	-5.66327	8	3/4	No CD4 monitoring	Arm B (36 weeks ZDV)	Nevirapine	No	Other
79	4	=	4530	Viral load response	Male	B	2	-4.035	-5.66327	8	3/4	No CD4 monitoring	Arm B (36 weeks ZDV)	Nevirapine	No	Other
79	36	<	80	Viral load response	Male	B	2	-4.035	-5.66327	8	3/4	No CD4 monitoring	Arm B (36 weeks ZDV)	Nevirapine	No	Other
79	48	<	80	Viral load response	Male	B	2	-4.035	-5.66327	8	3/4	No CD4 monitoring	Arm B (36 weeks ZDV)	Nevirapine	No	Other
79	60	<	80	Viral load response	Male	B	2	-4.035	-5.66327	8	3/4	No CD4 monitoring	Arm B (36 weeks ZDV)	Nevirapine	No	Other
79	72	<	80	Viral load response	Male	B	2	-4.035	-5.66327	8	3/4	No CD4 monitoring	Arm B (36 weeks ZDV)	Nevirapine	No	Other
79	96	<	80	Viral load response	Male	B	2	-4.035	-5.66327	8	3/4	No CD4 monitoring	Arm B (36 weeks ZDV)	Nevirapine	No	Other
79	108	<	80	Viral load response	Male	B	2	-4.035	-5.66327	8	3/4	No CD4 monitoring	Arm B (36 weeks ZDV)	Nevirapine	No	Other
79	144	<	80	Viral load response	Male	B	2	-4.035	-5.66327	8	3/4	No CD4 monitoring	Arm B (36 weeks ZDV)	Nevirapine	No	Other
79	156	<	80	Viral load response	Male	B	2	-4.035	-5.66327	8	3/4	No CD4 monitoring	Arm B (36 weeks ZDV)	Nevirapine	No	Other
79	168	<	80	Viral load response	Male	B	2	-4.035	-5.66327	8	3/4	No CD4 monitoring	Arm B (36 weeks ZDV)	Nevirapine	No	Other
79	192	<	80	Viral load response	Male	B	2	-4.035	-5.66327	8	3/4	No CD4 monitoring	Arm B (36 weeks ZDV)	Nevirapine	No	Other
79	204	<	80	Viral load response	Male	B	2	-4.035	-5.66327	8	3/4	No CD4 monitoring	Arm B (36 weeks ZDV)	Nevirapine	No	Other
80	0	=	156611	Baseline	Male	A	12	-3.21	-3.47823	1	3/4	No CD4 monitoring	Arm B (36 weeks ZDV)	Efavirenz	No	Mother
80	4	<	80	Viral load response	Male	A	12	-3.21	-3.47823	1	3/4	No CD4 monitoring	Arm B (36 weeks ZDV)	Efavirenz	No	Mother
80	24	=	330	Viral load response	Male	A	12	-3.21	-3.47823	1	3/4	No CD4 monitoring	Arm B (36 weeks ZDV)	Efavirenz	No	Mother
80	36	<	80	Viral load response	Male	A	12	-3.21	-3.47823	1	3/4	No CD4 monitoring	Arm B (36 weeks ZDV)	Efavirenz	No	Mother
80	48	<	80	Viral load response	Male	A	12	-3.21	-3.47823	1	3/4	No CD4 monitoring	Arm B (36 weeks ZDV)	Efavirenz	No	Mother
80	72	<	80	Viral load response	Male	A	12	-3.21	-3.47823	1	3/4	No CD4 monitoring	Arm B (36 weeks ZDV)	Efavirenz	No	Mother
80	96	<	80	Viral load response	Male	A	12	-3.21	-3.47823	1	3/4	No CD4 monitoring	Arm B (36 weeks ZDV)	Efavirenz	No	Mother
80	108	<	80	Viral load response	Male	A	12	-3.21	-3.47823	1	3/4	No CD4 monitoring	Arm B (36 weeks ZDV)	Efavirenz	No	Mother
80	120	<	80	Viral load response	Male	A	12	-3.21	-3.47823	1	3/4	No CD4 monitoring	Arm B (36 weeks ZDV)	Efavirenz	No	Mother
80	144	<	80	Viral load response	Male	A	12	-3.21	-3.47823	1	3/4	No CD4 monitoring	Arm B (36 weeks ZDV)	Efavirenz	No	Mother
80	168	<	80	Viral load response	Male	A	12	-3.21	-3.47823	1	3/4	No CD4 monitoring	Arm B (36 weeks ZDV)	Efavirenz	No	Mother
80	192	<	80	Viral load response	Male	A	12	-3.21	-3.47823	1	3/4	No CD4 monitoring	Arm B (36 weeks ZDV)	Efavirenz	No	Mother
81	0	=	198304	Baseline	Female	B	10	-3.515	-3.36033	17.95	3/4	No CD4 monitoring	Arm B (36 weeks ZDV)	Nevirapine	No	Other
81	4	=	1166	Viral load response	Female	B	10	-3.515	-3.36033	17.95	3/4	No CD4 monitoring	Arm B (36 weeks ZDV)	Nevirapine	No	Other
81	24	<	80	Viral load response	Female	B	10	-3.515	-3.36033	17.95	3/4	No CD4 monitoring	Arm B (36 weeks ZDV)	Nevirapine	No	Other
81	36	<	80	Viral load response	Female	B	10	-3.515	-3.36033	17.95	3/4	No CD4 monitoring	Arm B (36 weeks ZDV)	Nevirapine	No	Other
81	48	<	80	Viral load response	Female	B	10	-3.515	-3.36033	17.95	3/4	No CD4 monitoring	Arm B (36 weeks ZDV)	Nevirapine	No	Other
81	72	<	80	Viral load response	Female	B	10	-3.515	-3.36033	17.95	3/4	No CD4 monitoring	Arm B (36 weeks ZDV)	Nevirapine	No	Other
81	96	<	80	Viral load response	Female	B	10	-3.515	-3.36033	17.95	3/4	No CD4 monitoring	Arm B (36 weeks ZDV)	Nevirapine	No	Other
81	120	<	80	Viral load response	Female	B	10	-3.515	-3.36033	17.95	3/4	No CD4 monitoring	Arm B (36 weeks ZDV)	Nevirapine	No	Other
81	144	<	80	Viral load response	Female	B	10	-3.515	-3.36033	17.95	3/4	No CD4 monitoring	Arm B (36 weeks ZDV)	Nevirapine	No	Other
81	168	<	80	Viral load response	Female	B	10	-3.515	-3.36033	17.95	3/4	No CD4 monitoring	Arm B (36 weeks ZDV)	Nevirapine	No	Other
81	192	<	80	Viral load response	Female	B	10	-3.515	-3.36033	17.95	3/4	No CD4 monitoring	Arm B (36 weeks ZDV)	Nevirapine	No	Other
81	204	<	80	Viral load response	Female	B	10	-3.515	-3.36033	17.95	3/4	No CD4 monitoring	Arm B (36 weeks ZDV)	Nevirapine	No	Other
82	0	=	10130	Baseline	Male	D	11	-2.04	-1.97106	19	3/4	CD4 monitoring	Arm A (3TC/ABC/NNRTI throughout)	Nevirapine	No	Other
82	4	<	80	Viral load response	Male	D	11	-2.04	-1.97106	19	3/4	CD4 monitoring	Arm A (3TC/ABC/NNRTI throughout)	Nevirapine	No	Other
82	24	<	80	Viral load response	Male	D	11	-2.04	-1.97106	19	3/4	CD4 monitoring	Arm A (3TC/ABC/NNRTI throughout)	Nevirapine	No	Other
82	36	<	80	Viral load response	Male	D	11	-2.04	-1.97106	19	3/4	CD4 monitoring	Arm A (3TC/ABC/NNRTI throughout)	Nevirapine	No	Other
82	48	<	80	Viral load response	Male	D	11	-2.04	-1.97106	19	3/4	CD4 monitoring	Arm A (3TC/ABC/NNRTI throughout)	Nevirapine	No	Other
82	72	<	80	Viral load response	Male	D	11	-2.04	-1.97106	19	3/4	CD4 monitoring	Arm A (3TC/ABC/NNRTI throughout)	Nevirapine	No	Other
82	96	<	80	Viral load response	Male	D	11	-2.04	-1.97106	19	3/4	CD4 monitoring	Arm A (3TC/ABC/NNRTI throughout)	Nevirapine	No	Other
82	120	<	80	Viral load response	Male	D	11	-2.04	-1.97106	19	3/4	CD4 monitoring	Arm A (3TC/ABC/NNRTI throughout)	Nevirapine	No	Other
82	144	<	80	Viral load response	Male	D	11	-2.04	-1.97106	19	3/4	CD4 monitoring	Arm A (3TC/ABC/NNRTI throughout)	Nevirapine	No	Other
82	168	<	80	Viral load response	Male	D	11	-2.04	-1.97106	19	3/4	CD4 monitoring	Arm A (3TC/ABC/NNRTI throughout)	Nevirapine	No	Other
82	192	<	80	Viral load response	Male	D	11	-2.04	-1.97106	19	3/4	CD4 monitoring	Arm A (3TC/ABC/NNRTI throughout)	Nevirapine	No	Other
83	0	=	30630	Baseline	Male	B	6	-2.36	-2.03281	31	3/4	CD4 monitoring	Arm B (36 weeks ZDV)	Efavirenz	No	Other
83	24	<	80	Viral load response	Male	B	6	-2.36	-2.03281	31	3/4	CD4 monitoring	Arm B (36 weeks ZDV)	Efavirenz	No	Other
83	36	<	80	Viral load response	Male	B	6	-2.36	-2.03281	31	3/4	CD4 monitoring	Arm B (36 weeks ZDV)	Efavirenz	No	Other
83	48	<	80	Viral load response	Male	B	6	-2.36	-2.03281	31	3/4	CD4 monitoring	Arm B (36 weeks ZDV)	Efavirenz	No	Other
83	72	<	80	Viral load response	Male	B	6	-2.36	-2.03281	31	3/4	CD4 monitoring	Arm B (36 weeks ZDV)	Efavirenz	No	Other
83	96	<	80	Viral load response	Male	B	6	-2.36	-2.03281	31	3/4	CD4 monitoring	Arm B (36 weeks ZDV)	Efavirenz	No	Other
83	120	<	80	Viral load response	Male	B	6	-2.36	-2.03281	31	3/4	CD4 monitoring	Arm B (36 weeks ZDV)	Efavirenz	No	Other
83	144	<	80	Viral load response	Male	B	6	-2.36	-2.03281	31	3/4	CD4 monitoring	Arm B (36 weeks ZDV)	Efavirenz	No	Other
83	168	<	80	Viral load response	Male	B	6	-2.36	-2.03281	31	3/4	CD4 monitoring	Arm B (36 weeks ZDV)	Efavirenz	No	Other
83	180	<	80	Viral load response	Male	B	6	-2.36	-2.03281	31	3/4	CD4 monitoring	Arm B (36 weeks ZDV)	Efavirenz	No	Other
84	0	=	395349	Baseline	Female	A	10	-2.635	-3.27224	0.2	3/4	CD4 monitoring	Arm B (36 weeks ZDV)	Nevirapine	No	Other
84	4	=	6035	Viral load response	Female	A	10	-2.635	-3.27224	0.2	3/4	CD4 monitoring	Arm B (36 weeks ZDV)	Nevirapine	No	Other
84	24	<	80	Viral load response	Female	A	10	-2.635	-3.27224	0.2	3/4	CD4 monitoring	Arm B (36 weeks ZDV)	Nevirapine	No	Other
84	36	<	80	Viral load response	Female	A	10	-2.635	-3.27224	0.2	3/4	CD4 monitoring	Arm B (36 weeks ZDV)	Nevirapine	No	Other
84	48	<	80	Viral load response	Female	A	10	-2.635	-3.27224	0.2	3/4	CD4 monitoring	Arm B (36 weeks ZDV)	Nevirapine	No	Other
84	72	<	80	Viral load response	Female	A	10	-2.635	-3.27224	0.2	3/4	CD4 monitoring	Arm B (36 weeks ZDV)	Nevirapine	No	Other
84	108	<	80	Viral load response	Female	A	10	-2.635	-3.27224	0.2	3/4	CD4 monitoring	Arm B (36 weeks ZDV)	Nevirapine	No	Other
84	120	<	80	Viral load response	Female	A	10	-2.635	-3.27224	0.2	3/4	CD4 monitoring	Arm B (36 weeks ZDV)	Nevirapine	No	Other
84	144	<	80	Viral load response	Female	A	10	-2.635	-3.27224	0.2	3/4	CD4 monitoring	Arm B (36 weeks ZDV)	Nevirapine	No	Other
84	168	<	80	Viral load response	Female	A	10	-2.635	-3.27224	0.2	3/4	CD4 monitoring	Arm B (36 weeks ZDV)	Nevirapine	No	Other
84	192	<	80	Viral load response	Female	A	10	-2.635	-3.27224	0.2	3/4	CD4 monitoring	Arm B (36 weeks ZDV)	Nevirapine	No	Other
85	0	=	39384	Baseline	Female	D	2	-1.96	-1.90053	12.5	1/2	No CD4 monitoring	Arm C (long-term ZDV, 3NRTI after week-36)	Nevirapine	No	Mother
85	4	=	236	Viral load response	Female	D	2	-1.96	-1.90053	12.5	1/2	No CD4 monitoring	Arm C (long-term ZDV, 3NRTI after week-36)	Nevirapine	No	Mother
85	24	<	80	Viral load response	Female	D	2	-1.96	-1.90053	12.5	1/2	No CD4 monitoring	Arm C (long-term ZDV, 3NRTI after week-36)	Nevirapine	No	Mother
85	36	<	80	Viral load response	Female	D	2	-1.96	-1.90053	12.5	1/2	No CD4 monitoring	Arm C (long-term ZDV, 3NRTI after week-36)	Nevirapine	No	Mother
85	48	<	80	Viral load response	Female	D	2	-1.96	-1.90053	12.5	1/2	No CD4 monitoring	Arm C (long-term ZDV, 3NRTI after week-36)	Nevirapine	No	Mother
85	72	<	80	Viral load response	Female	D	2	-1.96	-1.90053	12.5	1/2	No CD4 monitoring	Arm C (long-term ZDV, 3NRTI after week-36)	Nevirapine	No	Mother
85	108	<	80	Viral load response	Female	D	2	-1.96	-1.90053	12.5	1/2	No CD4 monitoring	Arm C (long-term ZDV, 3NRTI after week-36)	Nevirapine	No	Mother
85	120	<	80	Viral load response	Female	D	2	-1.96	-1.90053	12.5	1/2	No CD4 monitoring	Arm C (long-term ZDV, 3NRTI after week-36)	Nevirapine	No	Mother
85	144	<	80	Viral load response	Female	D	2	-1.96	-1.90053	12.5	1/2	No CD4 monitoring	Arm C (long-term ZDV, 3NRTI after week-36)	Nevirapine	No	Mother
85	168	<	80	Viral load response	Female	D	2	-1.96	-1.90053	12.5	1/2	No CD4 monitoring	Arm C (long-term ZDV, 3NRTI after week-36)	Nevirapine	No	Mother
85	180	<	80	Viral load response	Female	D	2	-1.96	-1.90053	12.5	1/2	No CD4 monitoring	Arm C (long-term ZDV, 3NRTI after week-36)	Nevirapine	No	Mother
86	0	=	515772	Baseline	Female	C	1	-2.94	-1.02396	19.5	1/2	CD4 monitoring	Arm C (long-term ZDV, 3NRTI after week-36)	Nevirapine	No	Other
86	4	=	114	Viral load response	Female	C	1	-2.94	-1.02396	19.5	1/2	CD4 monitoring	Arm C (long-term ZDV, 3NRTI after week-36)	Nevirapine	No	Other
86	24	<	80	Viral load response	Female	C	1	-2.94	-1.02396	19.5	1/2	CD4 monitoring	Arm C (long-term ZDV, 3NRTI after week-36)	Nevirapine	No	Other
86	36	=	136	Viral load response	Female	C	1	-2.94	-1.02396	19.5	1/2	CD4 monitoring	Arm C (long-term ZDV, 3NRTI after week-36)	Nevirapine	No	Other
86	48	<	80	Viral load response	Female	C	1	-2.94	-1.02396	19.5	1/2	CD4 monitoring	Arm C (long-term ZDV, 3NRTI after week-36)	Nevirapine	No	Other
86	72	<	80	Viral load response	Female	C	1	-2.94	-1.02396	19.5	1/2	CD4 monitoring	Arm C (long-term ZDV, 3NRTI after week-36)	Nevirapine	No	Other
86	84	<	80	Viral load response	Female	C	1	-2.94	-1.02396	19.5	1/2	CD4 monitoring	Arm C (long-term ZDV, 3NRTI after week-36)	Nevirapine	No	Other
86	120	<	80	Viral load response	Female	C	1	-2.94	-1.02396	19.5	1/2	CD4 monitoring	Arm C (long-term ZDV, 3NRTI after week-36)	Nevirapine	No	Other
86	132	<	80	Viral load response	Female	C	1	-2.94	-1.02396	19.5	1/2	CD4 monitoring	Arm C (long-term ZDV, 3NRTI after week-36)	Nevirapine	No	Other
86	144	<	80	Viral load response	Female	C	1	-2.94	-1.02396	19.5	1/2	CD4 monitoring	Arm C (long-term ZDV, 3NRTI after week-36)	Nevirapine	No	Other
86	168	<	80	Viral load response	Female	C	1	-2.94	-1.02396	19.5	1/2	CD4 monitoring	Arm C (long-term ZDV, 3NRTI after week-36)	Nevirapine	No	Other
86	192	<	80	Viral load response	Female	C	1	-2.94	-1.02396	19.5	1/2	CD4 monitoring	Arm C (long-term ZDV, 3NRTI after week-36)	Nevirapine	No	Other
86	204	<	80	Viral load response	Female	C	1	-2.94	-1.02396	19.5	1/2	CD4 monitoring	Arm C (long-term ZDV, 3NRTI after week-36)	Nevirapine	No	Other
87	0	=	329740	Baseline	Male	D	2	-0.47	-0.792853	12	1/2	No CD4 monitoring	Arm C (long-term ZDV, 3NRTI after week-36)	Nevirapine	Yes	Mother
87	4	=	138	Viral load response	Male	D	2	-0.47	-0.792853	12	1/2	No CD4 monitoring	Arm C (long-term ZDV, 3NRTI after week-36)	Nevirapine	Yes	Mother
87	24	<	80	Viral load response	Male	D	2	-0.47	-0.792853	12	1/2	No CD4 monitoring	Arm C (long-term ZDV, 3NRTI after week-36)	Nevirapine	Yes	Mother
87	36	=	278	Viral load response	Male	D	2	-0.47	-0.792853	12	1/2	No CD4 monitoring	Arm C (long-term ZDV, 3NRTI after week-36)	Nevirapine	Yes	Mother
87	48	<	80	Viral load response	Male	D	2	-0.47	-0.792853	12	1/2	No CD4 monitoring	Arm C (long-term ZDV, 3NRTI after week-36)	Nevirapine	Yes	Mother
87	72	<	80	Viral load response	Male	D	2	-0.47	-0.792853	12	1/2	No CD4 monitoring	Arm C (long-term ZDV, 3NRTI after week-36)	Nevirapine	Yes	Mother
87	96	<	80	Viral load response	Male	D	2	-0.47	-0.792853	12	1/2	No CD4 monitoring	Arm C (long-term ZDV, 3NRTI after week-36)	Nevirapine	Yes	Mother
87	120	<	80	Viral load response	Male	D	2	-0.47	-0.792853	12	1/2	No CD4 monitoring	Arm C (long-term ZDV, 3NRTI after week-36)	Nevirapine	Yes	Mother
87	156	<	80	Viral load response	Male	D	2	-0.47	-0.792853	12	1/2	No CD4 monitoring	Arm C (long-term ZDV, 3NRTI after week-36)	Nevirapine	Yes	Mother
87	168	<	80	Viral load response	Male	D	2	-0.47	-0.792853	12	1/2	No CD4 monitoring	Arm C (long-term ZDV, 3NRTI after week-36)	Nevirapine	Yes	Mother
87	180	<	80	Viral load response	Male	D	2	-0.47	-0.792853	12	1/2	No CD4 monitoring	Arm C (long-term ZDV, 3NRTI after week-36)	Nevirapine	Yes	Mother
88	0	=	395192	Baseline	Male	D	5	-0.03	0.47664	22.5	3/4	CD4 monitoring	Arm B (36 weeks ZDV)	Efavirenz	No	Other
88	4	=	212	Viral load response	Male	D	5	-0.03	0.47664	22.5	3/4	CD4 monitoring	Arm B (36 weeks ZDV)	Efavirenz	No	Other
88	24	<	80	Viral load response	Male	D	5	-0.03	0.47664	22.5	3/4	CD4 monitoring	Arm B (36 weeks ZDV)	Efavirenz	No	Other
88	36	=	238	Viral load response	Male	D	5	-0.03	0.47664	22.5	3/4	CD4 monitoring	Arm B (36 weeks ZDV)	Efavirenz	No	Other
88	48	<	80	Viral load response	Male	D	5	-0.03	0.47664	22.5	3/4	CD4 monitoring	Arm B (36 weeks ZDV)	Efavirenz	No	Other
88	72	<	80	Viral load response	Male	D	5	-0.03	0.47664	22.5	3/4	CD4 monitoring	Arm B (36 weeks ZDV)	Efavirenz	No	Other
88	96	<	80	Viral load response	Male	D	5	-0.03	0.47664	22.5	3/4	CD4 monitoring	Arm B (36 weeks ZDV)	Efavirenz	No	Other
88	120	<	80	Viral load response	Male	D	5	-0.03	0.47664	22.5	3/4	CD4 monitoring	Arm B (36 weeks ZDV)	Efavirenz	No	Other
88	144	<	80	Viral load response	Male	D	5	-0.03	0.47664	22.5	3/4	CD4 monitoring	Arm B (36 weeks ZDV)	Efavirenz	No	Other
88	168	<	80	Viral load response	Male	D	5	-0.03	0.47664	22.5	3/4	CD4 monitoring	Arm B (36 weeks ZDV)	Efavirenz	No	Other
88	180	<	80	Viral load response	Male	D	5	-0.03	0.47664	22.5	3/4	CD4 monitoring	Arm B (36 weeks ZDV)	Efavirenz	No	Other
89	0	=	431561	Baseline	Female	A	1	-2.855	-4.34753	20.5	3/4	CD4 monitoring	Arm C (long-term ZDV, 3NRTI after week-36)	Nevirapine	Yes	Mother
89	4	=	2095	Viral load response	Female	A	1	-2.855	-4.34753	20.5	3/4	CD4 monitoring	Arm C (long-term ZDV, 3NRTI after week-36)	Nevirapine	Yes	Mother
89	24	=	210	Viral load response	Female	A	1	-2.855	-4.34753	20.5	3/4	CD4 monitoring	Arm C (long-term ZDV, 3NRTI after week-36)	Nevirapine	Yes	Mother
89	36	=	90	Viral load response	Female	A	1	-2.855	-4.34753	20.5	3/4	CD4 monitoring	Arm C (long-term ZDV, 3NRTI after week-36)	Nevirapine	Yes	Mother
89	48	<	80	Viral load response	Female	A	1	-2.855	-4.34753	20.5	3/4	CD4 monitoring	Arm C (long-term ZDV, 3NRTI after week-36)	Nevirapine	Yes	Mother
89	96	<	80	Viral load response	Female	A	1	-2.855	-4.34753	20.5	3/4	CD4 monitoring	Arm C (long-term ZDV, 3NRTI after week-36)	Nevirapine	Yes	Mother
89	108	<	80	Viral load response	Female	A	1	-2.855	-4.34753	20.5	3/4	CD4 monitoring	Arm C (long-term ZDV, 3NRTI after week-36)	Nevirapine	Yes	Mother
89	120	<	80	Viral load response	Female	A	1	-2.855	-4.34753	20.5	3/4	CD4 monitoring	Arm C (long-term ZDV, 3NRTI after week-36)	Nevirapine	Yes	Mother
89	132	<	80	Viral load response	Female	A	1	-2.855	-4.34753	20.5	3/4	CD4 monitoring	Arm C (long-term ZDV, 3NRTI after week-36)	Nevirapine	Yes	Mother
89	144	<	80	Viral load response	Female	A	1	-2.855	-4.34753	20.5	3/4	CD4 monitoring	Arm C (long-term ZDV, 3NRTI after week-36)	Nevirapine	Yes	Mother
89	168	<	80	Viral load response	Female	A	1	-2.855	-4.34753	20.5	3/4	CD4 monitoring	Arm C (long-term ZDV, 3NRTI after week-36)	Nevirapine	Yes	Mother
89	180	<	80	Viral load response	Female	A	1	-2.855	-4.34753	20.5	3/4	CD4 monitoring	Arm C (long-term ZDV, 3NRTI after week-36)	Nevirapine	Yes	Mother
90	0	=	94714	Baseline	Female	D	2	-2.825	-3.04688	20	3/4	CD4 monitoring	Arm B (36 weeks ZDV)	Nevirapine	Yes	Mother
90	4	=	6536	Viral load response	Female	D	2	-2.825	-3.04688	20	3/4	CD4 monitoring	Arm B (36 weeks ZDV)	Nevirapine	Yes	Mother
90	24	<	80	Viral load response	Female	D	2	-2.825	-3.04688	20	3/4	CD4 monitoring	Arm B (36 weeks ZDV)	Nevirapine	Yes	Mother
90	36	=	248	Viral load response	Female	D	2	-2.825	-3.04688	20	3/4	CD4 monitoring	Arm B (36 weeks ZDV)	Nevirapine	Yes	Mother
90	48	<	80	Viral load response	Female	D	2	-2.825	-3.04688	20	3/4	CD4 monitoring	Arm B (36 weeks ZDV)	Nevirapine	Yes	Mother
90	72	<	80	Viral load response	Female	D	2	-2.825	-3.04688	20	3/4	CD4 monitoring	Arm B (36 weeks ZDV)	Nevirapine	Yes	Mother
90	96	<	80	Viral load response	Female	D	2	-2.825	-3.04688	20	3/4	CD4 monitoring	Arm B (36 weeks ZDV)	Nevirapine	Yes	Mother
90	132	<	80	Viral load response	Female	D	2	-2.825	-3.04688	20	3/4	CD4 monitoring	Arm B (36 weeks ZDV)	Nevirapine	Yes	Mother
90	144	<	80	Viral load response	Female	D	2	-2.825	-3.04688	20	3/4	CD4 monitoring	Arm B (36 weeks ZDV)	Nevirapine	Yes	Mother
90	168	<	80	Viral load response	Female	D	2	-2.825	-3.04688	20	3/4	CD4 monitoring	Arm B (36 weeks ZDV)	Nevirapine	Yes	Mother
90	192	<	80	Viral load response	Female	D	2	-2.825	-3.04688	20	3/4	CD4 monitoring	Arm B (36 weeks ZDV)	Nevirapine	Yes	Mother
91	0	=	297259	Baseline	Female	A	8	-2.395	-1.33889	10	3/4	No CD4 monitoring	Arm B (36 weeks ZDV)	Nevirapine	No	Other
91	4	=	351	Viral load response	Female	A	8	-2.395	-1.33889	10	3/4	No CD4 monitoring	Arm B (36 weeks ZDV)	Nevirapine	No	Other
91	24	<	80	Viral load response	Female	A	8	-2.395	-1.33889	10	3/4	No CD4 monitoring	Arm B (36 weeks ZDV)	Nevirapine	No	Other
91	36	=	113	Viral load response	Female	A	8	-2.395	-1.33889	10	3/4	No CD4 monitoring	Arm B (36 weeks ZDV)	Nevirapine	No	Other
91	60	<	80	Viral load response	Female	A	8	-2.395	-1.33889	10	3/4	No CD4 monitoring	Arm B (36 weeks ZDV)	Nevirapine	No	Other
91	72	<	80	Viral load response	Female	A	8	-2.395	-1.33889	10	3/4	No CD4 monitoring	Arm B (36 weeks ZDV)	Nevirapine	No	Other
91	96	<	80	Viral load response	Female	A	8	-2.395	-1.33889	10	3/4	No CD4 monitoring	Arm B (36 weeks ZDV)	Nevirapine	No	Other
91	108	<	80	Viral load response	Female	A	8	-2.395	-1.33889	10	3/4	No CD4 monitoring	Arm B (36 weeks ZDV)	Nevirapine	No	Other
91	120	<	80	Viral load response	Female	A	8	-2.395	-1.33889	10	3/4	No CD4 monitoring	Arm B (36 weeks ZDV)	Nevirapine	No	Other
91	144	<	80	Viral load response	Female	A	8	-2.395	-1.33889	10	3/4	No CD4 monitoring	Arm B (36 weeks ZDV)	Nevirapine	No	Other
91	168	<	80	Viral load response	Female	A	8	-2.395	-1.33889	10	3/4	No CD4 monitoring	Arm B (36 weeks ZDV)	Nevirapine	No	Other
91	192	<	80	Viral load response	Female	A	8	-2.395	-1.33889	10	3/4	No CD4 monitoring	Arm B (36 weeks ZDV)	Nevirapine	No	Other
92	0	=	152444	Baseline	Male	C	2	-3.835	-3.04257	15	1/2	No CD4 monitoring	Arm B (36 weeks ZDV)	Nevirapine	No	Mother
92	4	=	5090	Viral load response	Male	C	2	-3.835	-3.04257	15	1/2	No CD4 monitoring	Arm B (36 weeks ZDV)	Nevirapine	No	Mother
92	24	<	80	Viral load response	Male	C	2	-3.835	-3.04257	15	1/2	No CD4 monitoring	Arm B (36 weeks ZDV)	Nevirapine	No	Mother
92	36	=	104	Viral load response	Male	C	2	-3.835	-3.04257	15	1/2	No CD4 monitoring	Arm B (36 weeks ZDV)	Nevirapine	No	Mother
92	48	<	80	Viral load response	Male	C	2	-3.835	-3.04257	15	1/2	No CD4 monitoring	Arm B (36 weeks ZDV)	Nevirapine	No	Mother
92	60	<	80	Viral load response	Male	C	2	-3.835	-3.04257	15	1/2	No CD4 monitoring	Arm B (36 weeks ZDV)	Nevirapine	No	Mother
92	72	<	80	Viral load response	Male	C	2	-3.835	-3.04257	15	1/2	No CD4 monitoring	Arm B (36 weeks ZDV)	Nevirapine	No	Mother
92	96	<	80	Viral load response	Male	C	2	-3.835	-3.04257	15	1/2	No CD4 monitoring	Arm B (36 weeks ZDV)	Nevirapine	No	Mother
92	108	<	80	Viral load response	Male	C	2	-3.835	-3.04257	15	1/2	No CD4 monitoring	Arm B (36 weeks ZDV)	Nevirapine	No	Mother
92	120	<	80	Viral load response	Male	C	2	-3.835	-3.04257	15	1/2	No CD4 monitoring	Arm B (36 weeks ZDV)	Nevirapine	No	Mother
92	144	<	80	Viral load response	Male	C	2	-3.835	-3.04257	15	1/2	No CD4 monitoring	Arm B (36 weeks ZDV)	Nevirapine	No	Mother
92	156	<	80	Viral load response	Male	C	2	-3.835	-3.04257	15	1/2	No CD4 monitoring	Arm B (36 weeks ZDV)	Nevirapine	No	Mother
92	168	<	80	Viral load response	Male	C	2	-3.835	-3.04257	15	1/2	No CD4 monitoring	Arm B (36 weeks ZDV)	Nevirapine	No	Mother
92	192	<	80	Viral load response	Male	C	2	-3.835	-3.04257	15	1/2	No CD4 monitoring	Arm B (36 weeks ZDV)	Nevirapine	No	Mother
93	0	=	7332898	Baseline	Female	D	2	-2.275	-0.745319	16.5	3/4	No CD4 monitoring	Arm C (long-term ZDV, 3NRTI after week-36)	Nevirapine	Yes	Mother
93	4	=	14680	Viral load response	Female	D	2	-2.275	-0.745319	16.5	3/4	No CD4 monitoring	Arm C (long-term ZDV, 3NRTI after week-36)	Nevirapine	Yes	Mother
93	24	<	80	Viral load response	Female	D	2	-2.275	-0.745319	16.5	3/4	No CD4 monitoring	Arm C (long-term ZDV, 3NRTI after week-36)	Nevirapine	Yes	Mother
93	36	=	2054	Viral load response	Female	D	2	-2.275	-0.745319	16.5	3/4	No CD4 monitoring	Arm C (long-term ZDV, 3NRTI after week-36)	Nevirapine	Yes	Mother
93	48	<	80	Viral load response	Female	D	2	-2.275	-0.745319	16.5	3/4	No CD4 monitoring	Arm C (long-term ZDV, 3NRTI after week-36)	Nevirapine	Yes	Mother
93	72	<	80	Viral load response	Female	D	2	-2.275	-0.745319	16.5	3/4	No CD4 monitoring	Arm C (long-term ZDV, 3NRTI after week-36)	Nevirapine	Yes	Mother
93	96	<	80	Viral load response	Female	D	2	-2.275	-0.745319	16.5	3/4	No CD4 monitoring	Arm C (long-term ZDV, 3NRTI after week-36)	Nevirapine	Yes	Mother
93	120	<	80	Viral load response	Female	D	2	-2.275	-0.745319	16.5	3/4	No CD4 monitoring	Arm C (long-term ZDV, 3NRTI after week-36)	Nevirapine	Yes	Mother
93	144	<	80	Viral load response	Female	D	2	-2.275	-0.745319	16.5	3/4	No CD4 monitoring	Arm C (long-term ZDV, 3NRTI after week-36)	Nevirapine	Yes	Mother
93	168	<	80	Viral load response	Female	D	2	-2.275	-0.745319	16.5	3/4	No CD4 monitoring	Arm C (long-term ZDV, 3NRTI after week-36)	Nevirapine	Yes	Mother
93	192	<	80	Viral load response	Female	D	2	-2.275	-0.745319	16.5	3/4	No CD4 monitoring	Arm C (long-term ZDV, 3NRTI after week-36)	Nevirapine	Yes	Mother
94	0	=	12210804	Baseline	Male	C	2	-2.745	-2.05034	13.5	3/4	CD4 monitoring	Arm B (36 weeks ZDV)	Nevirapine	No	Other
94	4	=	19480	Viral load response	Male	C	2	-2.745	-2.05034	13.5	3/4	CD4 monitoring	Arm B (36 weeks ZDV)	Nevirapine	No	Other
94	24	<	80	Viral load response	Male	C	2	-2.745	-2.05034	13.5	3/4	CD4 monitoring	Arm B (36 weeks ZDV)	Nevirapine	No	Other
94	36	=	142	Viral load response	Male	C	2	-2.745	-2.05034	13.5	3/4	CD4 monitoring	Arm B (36 weeks ZDV)	Nevirapine	No	Other
94	48	<	80	Viral load response	Male	C	2	-2.745	-2.05034	13.5	3/4	CD4 monitoring	Arm B (36 weeks ZDV)	Nevirapine	No	Other
94	72	<	80	Viral load response	Male	C	2	-2.745	-2.05034	13.5	3/4	CD4 monitoring	Arm B (36 weeks ZDV)	Nevirapine	No	Other
94	96	<	80	Viral load response	Male	C	2	-2.745	-2.05034	13.5	3/4	CD4 monitoring	Arm B (36 weeks ZDV)	Nevirapine	No	Other
94	120	<	80	Viral load response	Male	C	2	-2.745	-2.05034	13.5	3/4	CD4 monitoring	Arm B (36 weeks ZDV)	Nevirapine	No	Other
94	144	<	80	Viral load response	Male	C	2	-2.745	-2.05034	13.5	3/4	CD4 monitoring	Arm B (36 weeks ZDV)	Nevirapine	No	Other
94	156	<	80	Viral load response	Male	C	2	-2.745	-2.05034	13.5	3/4	CD4 monitoring	Arm B (36 weeks ZDV)	Nevirapine	No	Other
95	0	=	1160528	Baseline	Female	D	0	-2.01	-1.58981	22.5	1/2	No CD4 monitoring	Arm B (36 weeks ZDV)	Nevirapine	No	Mother
95	4	=	8174	Viral load response	Female	D	0	-2.01	-1.58981	22.5	1/2	No CD4 monitoring	Arm B (36 weeks ZDV)	Nevirapine	No	Mother
95	24	<	80	Viral load response	Female	D	0	-2.01	-1.58981	22.5	1/2	No CD4 monitoring	Arm B (36 weeks ZDV)	Nevirapine	No	Mother
95	36	=	158	Viral load response	Female	D	0	-2.01	-1.58981	22.5	1/2	No CD4 monitoring	Arm B (36 weeks ZDV)	Nevirapine	No	Mother
95	48	<	80	Viral load response	Female	D	0	-2.01	-1.58981	22.5	1/2	No CD4 monitoring	Arm B (36 weeks ZDV)	Nevirapine	No	Mother
95	72	<	80	Viral load response	Female	D	0	-2.01	-1.58981	22.5	1/2	No CD4 monitoring	Arm B (36 weeks ZDV)	Nevirapine	No	Mother
95	96	<	80	Viral load response	Female	D	0	-2.01	-1.58981	22.5	1/2	No CD4 monitoring	Arm B (36 weeks ZDV)	Nevirapine	No	Mother
95	120	<	80	Viral load response	Female	D	0	-2.01	-1.58981	22.5	1/2	No CD4 monitoring	Arm B (36 weeks ZDV)	Nevirapine	No	Mother
95	144	<	80	Viral load response	Female	D	0	-2.01	-1.58981	22.5	1/2	No CD4 monitoring	Arm B (36 weeks ZDV)	Nevirapine	No	Mother
95	168	<	80	Viral load response	Female	D	0	-2.01	-1.58981	22.5	1/2	No CD4 monitoring	Arm B (36 weeks ZDV)	Nevirapine	No	Mother
95	192	<	80	Viral load response	Female	D	0	-2.01	-1.58981	22.5	1/2	No CD4 monitoring	Arm B (36 weeks ZDV)	Nevirapine	No	Mother
96	0	=	764118	Baseline	Female	C	10	-2.445	-1.2955	1.5	1/2	CD4 monitoring	Arm B (36 weeks ZDV)	Efavirenz	No	Other
96	4	=	1174	Viral load response	Female	C	10	-2.445	-1.2955	1.5	1/2	CD4 monitoring	Arm B (36 weeks ZDV)	Efavirenz	No	Other
96	24	<	80	Viral load response	Female	C	10	-2.445	-1.2955	1.5	1/2	CD4 monitoring	Arm B (36 weeks ZDV)	Efavirenz	No	Other
96	36	=	114	Viral load response	Female	C	10	-2.445	-1.2955	1.5	1/2	CD4 monitoring	Arm B (36 weeks ZDV)	Efavirenz	No	Other
96	48	<	80	Viral load response	Female	C	10	-2.445	-1.2955	1.5	1/2	CD4 monitoring	Arm B (36 weeks ZDV)	Efavirenz	No	Other
96	72	<	80	Viral load response	Female	C	10	-2.445	-1.2955	1.5	1/2	CD4 monitoring	Arm B (36 weeks ZDV)	Efavirenz	No	Other
96	96	<	80	Viral load response	Female	C	10	-2.445	-1.2955	1.5	1/2	CD4 monitoring	Arm B (36 weeks ZDV)	Efavirenz	No	Other
96	120	<	80	Viral load response	Female	C	10	-2.445	-1.2955	1.5	1/2	CD4 monitoring	Arm B (36 weeks ZDV)	Efavirenz	No	Other
96	144	<	80	Viral load response	Female	C	10	-2.445	-1.2955	1.5	1/2	CD4 monitoring	Arm B (36 weeks ZDV)	Efavirenz	No	Other
96	168	<	80	Viral load response	Female	C	10	-2.445	-1.2955	1.5	1/2	CD4 monitoring	Arm B (36 weeks ZDV)	Efavirenz	No	Other
96	180	<	80	Viral load response	Female	C	10	-2.445	-1.2955	1.5	1/2	CD4 monitoring	Arm B (36 weeks ZDV)	Efavirenz	No	Other
96	204	<	80	Viral load response	Female	C	10	-2.445	-1.2955	1.5	1/2	CD4 monitoring	Arm B (36 weeks ZDV)	Efavirenz	No	Other
97	0	=	218698	Baseline	Male	A	1	-4.31	-5.05316	9.5	3/4	No CD4 monitoring	Arm B (36 weeks ZDV)	Nevirapine	No	Mother
97	4	=	2269	Viral load response	Male	A	1	-4.31	-5.05316	9.5	3/4	No CD4 monitoring	Arm B (36 weeks ZDV)	Nevirapine	No	Mother
97	24	<	80	Viral load response	Male	A	1	-4.31	-5.05316	9.5	3/4	No CD4 monitoring	Arm B (36 weeks ZDV)	Nevirapine	No	Mother
97	36	=	88	Viral load response	Male	A	1	-4.31	-5.05316	9.5	3/4	No CD4 monitoring	Arm B (36 weeks ZDV)	Nevirapine	No	Mother
97	48	<	80	Viral load response	Male	A	1	-4.31	-5.05316	9.5	3/4	No CD4 monitoring	Arm B (36 weeks ZDV)	Nevirapine	No	Mother
97	72	<	80	Viral load response	Male	A	1	-4.31	-5.05316	9.5	3/4	No CD4 monitoring	Arm B (36 weeks ZDV)	Nevirapine	No	Mother
97	96	<	80	Viral load response	Male	A	1	-4.31	-5.05316	9.5	3/4	No CD4 monitoring	Arm B (36 weeks ZDV)	Nevirapine	No	Mother
97	120	<	80	Viral load response	Male	A	1	-4.31	-5.05316	9.5	3/4	No CD4 monitoring	Arm B (36 weeks ZDV)	Nevirapine	No	Mother
97	144	<	80	Viral load response	Male	A	1	-4.31	-5.05316	9.5	3/4	No CD4 monitoring	Arm B (36 weeks ZDV)	Nevirapine	No	Mother
97	168	<	80	Viral load response	Male	A	1	-4.31	-5.05316	9.5	3/4	No CD4 monitoring	Arm B (36 weeks ZDV)	Nevirapine	No	Mother
97	192	<	80	Viral load response	Male	A	1	-4.31	-5.05316	9.5	3/4	No CD4 monitoring	Arm B (36 weeks ZDV)	Nevirapine	No	Mother
98	0	=	86432	Baseline	Female	D	0	-2.105	-2.68611	20	1/2	CD4 monitoring	Arm C (long-term ZDV, 3NRTI after week-36)	Nevirapine	No	Mother
98	4	=	7026	Viral load response	Female	D	0	-2.105	-2.68611	20	1/2	CD4 monitoring	Arm C (long-term ZDV, 3NRTI after week-36)	Nevirapine	No	Mother
98	24	<	80	Viral load response	Female	D	0	-2.105	-2.68611	20	1/2	CD4 monitoring	Arm C (long-term ZDV, 3NRTI after week-36)	Nevirapine	No	Mother
98	36	=	176	Viral load response	Female	D	0	-2.105	-2.68611	20	1/2	CD4 monitoring	Arm C (long-term ZDV, 3NRTI after week-36)	Nevirapine	No	Mother
98	48	<	80	Viral load response	Female	D	0	-2.105	-2.68611	20	1/2	CD4 monitoring	Arm C (long-term ZDV, 3NRTI after week-36)	Nevirapine	No	Mother
98	72	<	80	Viral load response	Female	D	0	-2.105	-2.68611	20	1/2	CD4 monitoring	Arm C (long-term ZDV, 3NRTI after week-36)	Nevirapine	No	Mother
98	96	<	80	Viral load response	Female	D	0	-2.105	-2.68611	20	1/2	CD4 monitoring	Arm C (long-term ZDV, 3NRTI after week-36)	Nevirapine	No	Mother
98	120	<	80	Viral load response	Female	D	0	-2.105	-2.68611	20	1/2	CD4 monitoring	Arm C (long-term ZDV, 3NRTI after week-36)	Nevirapine	No	Mother
98	144	<	80	Viral load response	Female	D	0	-2.105	-2.68611	20	1/2	CD4 monitoring	Arm C (long-term ZDV, 3NRTI after week-36)	Nevirapine	No	Mother
98	168	<	80	Viral load response	Female	D	0	-2.105	-2.68611	20	1/2	CD4 monitoring	Arm C (long-term ZDV, 3NRTI after week-36)	Nevirapine	No	Mother
98	192	<	80	Viral load response	Female	D	0	-2.105	-2.68611	20	1/2	CD4 monitoring	Arm C (long-term ZDV, 3NRTI after week-36)	Nevirapine	No	Mother
99	0	=	730558	Baseline	Female	A	2	-4.415	-3.38813	10.5	3/4	CD4 monitoring	Arm A (3TC/ABC/NNRTI throughout)	Nevirapine	No	Mother
99	4	=	9788	Viral load response	Female	A	2	-4.415	-3.38813	10.5	3/4	CD4 monitoring	Arm A (3TC/ABC/NNRTI throughout)	Nevirapine	No	Mother
99	24	<	80	Viral load response	Female	A	2	-4.415	-3.38813	10.5	3/4	CD4 monitoring	Arm A (3TC/ABC/NNRTI throughout)	Nevirapine	No	Mother
99	36	=	98	Viral load response	Female	A	2	-4.415	-3.38813	10.5	3/4	CD4 monitoring	Arm A (3TC/ABC/NNRTI throughout)	Nevirapine	No	Mother
99	48	<	80	Viral load response	Female	A	2	-4.415	-3.38813	10.5	3/4	CD4 monitoring	Arm A (3TC/ABC/NNRTI throughout)	Nevirapine	No	Mother
99	72	<	80	Viral load response	Female	A	2	-4.415	-3.38813	10.5	3/4	CD4 monitoring	Arm A (3TC/ABC/NNRTI throughout)	Nevirapine	No	Mother
99	96	<	80	Viral load response	Female	A	2	-4.415	-3.38813	10.5	3/4	CD4 monitoring	Arm A (3TC/ABC/NNRTI throughout)	Nevirapine	No	Mother
99	120	<	80	Viral load response	Female	A	2	-4.415	-3.38813	10.5	3/4	CD4 monitoring	Arm A (3TC/ABC/NNRTI throughout)	Nevirapine	No	Mother
99	132	<	80	Viral load response	Female	A	2	-4.415	-3.38813	10.5	3/4	CD4 monitoring	Arm A (3TC/ABC/NNRTI throughout)	Nevirapine	No	Mother
99	144	<	80	Viral load response	Female	A	2	-4.415	-3.38813	10.5	3/4	CD4 monitoring	Arm A (3TC/ABC/NNRTI throughout)	Nevirapine	No	Mother
99	168	<	80	Viral load response	Female	A	2	-4.415	-3.38813	10.5	3/4	CD4 monitoring	Arm A (3TC/ABC/NNRTI throughout)	Nevirapine	No	Mother
99	192	<	80	Viral load response	Female	A	2	-4.415	-3.38813	10.5	3/4	CD4 monitoring	Arm A (3TC/ABC/NNRTI throughout)	Nevirapine	No	Mother
100	0	=	409268	Baseline	Female	C	2	-5.34	-3.74241	16	3/4	CD4 monitoring	Arm C (long-term ZDV, 3NRTI after week-36)	Nevirapine	No	Mother
100	4	=	2068	Viral load response	Female	C	2	-5.34	-3.74241	16	3/4	CD4 monitoring	Arm C (long-term ZDV, 3NRTI after week-36)	Nevirapine	No	Mother
100	24	<	80	Viral load response	Female	C	2	-5.34	-3.74241	16	3/4	CD4 monitoring	Arm C (long-term ZDV, 3NRTI after week-36)	Nevirapine	No	Mother
100	36	=	90	Viral load response	Female	C	2	-5.34	-3.74241	16	3/4	CD4 monitoring	Arm C (long-term ZDV, 3NRTI after week-36)	Nevirapine	No	Mother
100	48	<	80	Viral load response	Female	C	2	-5.34	-3.74241	16	3/4	CD4 monitoring	Arm C (long-term ZDV, 3NRTI after week-36)	Nevirapine	No	Mother
100	72	<	80	Viral load response	Female	C	2	-5.34	-3.74241	16	3/4	CD4 monitoring	Arm C (long-term ZDV, 3NRTI after week-36)	Nevirapine	No	Mother
100	96	<	80	Viral load response	Female	C	2	-5.34	-3.74241	16	3/4	CD4 monitoring	Arm C (long-term ZDV, 3NRTI after week-36)	Nevirapine	No	Mother
100	120	<	80	Viral load response	Female	C	2	-5.34	-3.74241	16	3/4	CD4 monitoring	Arm C (long-term ZDV, 3NRTI after week-36)	Nevirapine	No	Mother
100	132	<	80	Viral load response	Female	C	2	-5.34	-3.74241	16	3/4	CD4 monitoring	Arm C (long-term ZDV, 3NRTI after week-36)	Nevirapine	No	Mother
100	144	<	80	Viral load response	Female	C	2	-5.34	-3.74241	16	3/4	CD4 monitoring	Arm C (long-term ZDV, 3NRTI after week-36)	Nevirapine	No	Mother
100	168	<	80	Viral load response	Female	C	2	-5.34	-3.74241	16	3/4	CD4 monitoring	Arm C (long-term ZDV, 3NRTI after week-36)	Nevirapine	No	Mother
100	180	<	80	Viral load response	Female	C	2	-5.34	-3.74241	16	3/4	CD4 monitoring	Arm C (long-term ZDV, 3NRTI after week-36)	Nevirapine	No	Mother
100	192	<	80	Viral load response	Female	C	2	-5.34	-3.74241	16	3/4	CD4 monitoring	Arm C (long-term ZDV, 3NRTI after week-36)	Nevirapine	No	Mother
100	216	<	80	Viral load response	Female	C	2	-5.34	-3.74241	16	3/4	CD4 monitoring	Arm C (long-term ZDV, 3NRTI after week-36)	Nevirapine	No	Mother
101	0	=	38496	Baseline	Male	C	3	-3.58	-1.12073	13	1/2	No CD4 monitoring	Arm B (36 weeks ZDV)	Nevirapine	No	Mother
101	4	=	1708	Viral load response	Male	C	3	-3.58	-1.12073	13	1/2	No CD4 monitoring	Arm B (36 weeks ZDV)	Nevirapine	No	Mother
101	24	<	80	Viral load response	Male	C	3	-3.58	-1.12073	13	1/2	No CD4 monitoring	Arm B (36 weeks ZDV)	Nevirapine	No	Mother
101	36	=	340	Viral load response	Male	C	3	-3.58	-1.12073	13	1/2	No CD4 monitoring	Arm B (36 weeks ZDV)	Nevirapine	No	Mother
101	48	<	80	Viral load response	Male	C	3	-3.58	-1.12073	13	1/2	No CD4 monitoring	Arm B (36 weeks ZDV)	Nevirapine	No	Mother
101	60	<	80	Viral load response	Male	C	3	-3.58	-1.12073	13	1/2	No CD4 monitoring	Arm B (36 weeks ZDV)	Nevirapine	No	Mother
101	72	<	80	Viral load response	Male	C	3	-3.58	-1.12073	13	1/2	No CD4 monitoring	Arm B (36 weeks ZDV)	Nevirapine	No	Mother
101	96	<	80	Viral load response	Male	C	3	-3.58	-1.12073	13	1/2	No CD4 monitoring	Arm B (36 weeks ZDV)	Nevirapine	No	Mother
101	108	<	80	Viral load response	Male	C	3	-3.58	-1.12073	13	1/2	No CD4 monitoring	Arm B (36 weeks ZDV)	Nevirapine	No	Mother
101	120	<	80	Viral load response	Male	C	3	-3.58	-1.12073	13	1/2	No CD4 monitoring	Arm B (36 weeks ZDV)	Nevirapine	No	Mother
101	156	<	80	Viral load response	Male	C	3	-3.58	-1.12073	13	1/2	No CD4 monitoring	Arm B (36 weeks ZDV)	Nevirapine	No	Mother
101	168	<	80	Viral load response	Male	C	3	-3.58	-1.12073	13	1/2	No CD4 monitoring	Arm B (36 weeks ZDV)	Nevirapine	No	Mother
101	180	<	80	Viral load response	Male	C	3	-3.58	-1.12073	13	1/2	No CD4 monitoring	Arm B (36 weeks ZDV)	Nevirapine	No	Mother
101	204	<	80	Viral load response	Male	C	3	-3.58	-1.12073	13	1/2	No CD4 monitoring	Arm B (36 weeks ZDV)	Nevirapine	No	Mother
102	0	=	10326	Baseline	Male	B	6	-1.755	-1.59944	29	3/4	CD4 monitoring	Arm A (3TC/ABC/NNRTI throughout)	Efavirenz	No	Other
102	4	=	118	Viral load response	Male	B	6	-1.755	-1.59944	29	3/4	CD4 monitoring	Arm A (3TC/ABC/NNRTI throughout)	Efavirenz	No	Other
102	24	<	80	Viral load response	Male	B	6	-1.755	-1.59944	29	3/4	CD4 monitoring	Arm A (3TC/ABC/NNRTI throughout)	Efavirenz	No	Other
102	36	=	122	Viral load response	Male	B	6	-1.755	-1.59944	29	3/4	CD4 monitoring	Arm A (3TC/ABC/NNRTI throughout)	Efavirenz	No	Other
102	48	<	80	Viral load response	Male	B	6	-1.755	-1.59944	29	3/4	CD4 monitoring	Arm A (3TC/ABC/NNRTI throughout)	Efavirenz	No	Other
102	72	<	80	Viral load response	Male	B	6	-1.755	-1.59944	29	3/4	CD4 monitoring	Arm A (3TC/ABC/NNRTI throughout)	Efavirenz	No	Other
102	96	<	80	Viral load response	Male	B	6	-1.755	-1.59944	29	3/4	CD4 monitoring	Arm A (3TC/ABC/NNRTI throughout)	Efavirenz	No	Other
102	120	<	80	Viral load response	Male	B	6	-1.755	-1.59944	29	3/4	CD4 monitoring	Arm A (3TC/ABC/NNRTI throughout)	Efavirenz	No	Other
102	144	<	80	Viral load response	Male	B	6	-1.755	-1.59944	29	3/4	CD4 monitoring	Arm A (3TC/ABC/NNRTI throughout)	Efavirenz	No	Other
102	168	<	80	Viral load response	Male	B	6	-1.755	-1.59944	29	3/4	CD4 monitoring	Arm A (3TC/ABC/NNRTI throughout)	Efavirenz	No	Other
102	180	<	80	Viral load response	Male	B	6	-1.755	-1.59944	29	3/4	CD4 monitoring	Arm A (3TC/ABC/NNRTI throughout)	Efavirenz	No	Other
103	0	=	174806	Baseline	Female	C	5	-2.74	-1.59488	13.5	1/2	CD4 monitoring	Arm A (3TC/ABC/NNRTI throughout)	Efavirenz	No	Other
103	24	<	80	Viral load response	Female	C	5	-2.74	-1.59488	13.5	1/2	CD4 monitoring	Arm A (3TC/ABC/NNRTI throughout)	Efavirenz	No	Other
103	36	=	82	Viral load response	Female	C	5	-2.74	-1.59488	13.5	1/2	CD4 monitoring	Arm A (3TC/ABC/NNRTI throughout)	Efavirenz	No	Other
103	48	<	80	Viral load response	Female	C	5	-2.74	-1.59488	13.5	1/2	CD4 monitoring	Arm A (3TC/ABC/NNRTI throughout)	Efavirenz	No	Other
103	72	<	80	Viral load response	Female	C	5	-2.74	-1.59488	13.5	1/2	CD4 monitoring	Arm A (3TC/ABC/NNRTI throughout)	Efavirenz	No	Other
103	96	<	80	Viral load response	Female	C	5	-2.74	-1.59488	13.5	1/2	CD4 monitoring	Arm A (3TC/ABC/NNRTI throughout)	Efavirenz	No	Other
103	120	<	80	Viral load response	Female	C	5	-2.74	-1.59488	13.5	1/2	CD4 monitoring	Arm A (3TC/ABC/NNRTI throughout)	Efavirenz	No	Other
103	144	<	80	Viral load response	Female	C	5	-2.74	-1.59488	13.5	1/2	CD4 monitoring	Arm A (3TC/ABC/NNRTI throughout)	Efavirenz	No	Other
103	168	<	80	Viral load response	Female	C	5	-2.74	-1.59488	13.5	1/2	CD4 monitoring	Arm A (3TC/ABC/NNRTI throughout)	Efavirenz	No	Other
103	180	<	80	Viral load response	Female	C	5	-2.74	-1.59488	13.5	1/2	CD4 monitoring	Arm A (3TC/ABC/NNRTI throughout)	Efavirenz	No	Other
104	0	=	155692	Baseline	Male	B	5	-2.595	-3.28876	1	3/4	No CD4 monitoring	Arm C (long-term ZDV, 3NRTI after week-36)	Nevirapine	No	Mother
104	4	=	638	Viral load response	Male	B	5	-2.595	-3.28876	1	3/4	No CD4 monitoring	Arm C (long-term ZDV, 3NRTI after week-36)	Nevirapine	No	Mother
104	24	=	348	Viral load response	Male	B	5	-2.595	-3.28876	1	3/4	No CD4 monitoring	Arm C (long-term ZDV, 3NRTI after week-36)	Nevirapine	No	Mother
104	48	<	80	Viral load response	Male	B	5	-2.595	-3.28876	1	3/4	No CD4 monitoring	Arm C (long-term ZDV, 3NRTI after week-36)	Nevirapine	No	Mother
104	72	=	90	Current or previous blip	Male	B	5	-2.595	-3.28876	1	3/4	No CD4 monitoring	Arm C (long-term ZDV, 3NRTI after week-36)	Nevirapine	No	Mother
104	84	<	80	Current or previous blip	Male	B	5	-2.595	-3.28876	1	3/4	No CD4 monitoring	Arm C (long-term ZDV, 3NRTI after week-36)	Nevirapine	No	Mother
104	96	<	80	Current or previous blip	Male	B	5	-2.595	-3.28876	1	3/4	No CD4 monitoring	Arm C (long-term ZDV, 3NRTI after week-36)	Nevirapine	No	Mother
104	132	<	80	Current or previous blip	Male	B	5	-2.595	-3.28876	1	3/4	No CD4 monitoring	Arm C (long-term ZDV, 3NRTI after week-36)	Nevirapine	No	Mother
104	144	<	80	Current or previous blip	Male	B	5	-2.595	-3.28876	1	3/4	No CD4 monitoring	Arm C (long-term ZDV, 3NRTI after week-36)	Nevirapine	No	Mother
104	168	<	80	Current or previous blip	Male	B	5	-2.595	-3.28876	1	3/4	No CD4 monitoring	Arm C (long-term ZDV, 3NRTI after week-36)	Nevirapine	No	Mother
104	180	<	80	Current or previous blip	Male	B	5	-2.595	-3.28876	1	3/4	No CD4 monitoring	Arm C (long-term ZDV, 3NRTI after week-36)	Nevirapine	No	Mother
105	0	=	217668	Baseline	Male	A	9	-3.15	-3.82305	1.5	3/4	CD4 monitoring	Arm A (3TC/ABC/NNRTI throughout)	Nevirapine	No	Other
105	4	=	222	Viral load response	Male	A	9	-3.15	-3.82305	1.5	3/4	CD4 monitoring	Arm A (3TC/ABC/NNRTI throughout)	Nevirapine	No	Other
105	24	<	80	Viral load response	Male	A	9	-3.15	-3.82305	1.5	3/4	CD4 monitoring	Arm A (3TC/ABC/NNRTI throughout)	Nevirapine	No	Other
105	48	<	80	Viral load response	Male	A	9	-3.15	-3.82305	1.5	3/4	CD4 monitoring	Arm A (3TC/ABC/NNRTI throughout)	Nevirapine	No	Other
105	72	<	80	Viral load response	Male	A	9	-3.15	-3.82305	1.5	3/4	CD4 monitoring	Arm A (3TC/ABC/NNRTI throughout)	Nevirapine	No	Other
105	96	<	80	Viral load response	Male	A	9	-3.15	-3.82305	1.5	3/4	CD4 monitoring	Arm A (3TC/ABC/NNRTI throughout)	Nevirapine	No	Other
105	108	<	80	Viral load response	Male	A	9	-3.15	-3.82305	1.5	3/4	CD4 monitoring	Arm A (3TC/ABC/NNRTI throughout)	Nevirapine	No	Other
105	120	<	80	Viral load response	Male	A	9	-3.15	-3.82305	1.5	3/4	CD4 monitoring	Arm A (3TC/ABC/NNRTI throughout)	Nevirapine	No	Other
105	144	=	21453	Current or previous blip	Male	A	9	-3.15	-3.82305	1.5	3/4	CD4 monitoring	Arm A (3TC/ABC/NNRTI throughout)	Nevirapine	No	Other
105	168	<	80	Current or previous blip	Male	A	9	-3.15	-3.82305	1.5	3/4	CD4 monitoring	Arm A (3TC/ABC/NNRTI throughout)	Nevirapine	No	Other
105	192	<	80	Current or previous blip	Male	A	9	-3.15	-3.82305	1.5	3/4	CD4 monitoring	Arm A (3TC/ABC/NNRTI throughout)	Nevirapine	No	Other
106	0	=	94336	Baseline	Male	B	2	-3.355	-2.35623	13	3/4	No CD4 monitoring	Arm A (3TC/ABC/NNRTI throughout)	Nevirapine	No	Other
106	4	=	588	Viral load response	Male	B	2	-3.355	-2.35623	13	3/4	No CD4 monitoring	Arm A (3TC/ABC/NNRTI throughout)	Nevirapine	No	Other
106	24	<	80	Viral load response	Male	B	2	-3.355	-2.35623	13	3/4	No CD4 monitoring	Arm A (3TC/ABC/NNRTI throughout)	Nevirapine	No	Other
106	48	<	80	Viral load response	Male	B	2	-3.355	-2.35623	13	3/4	No CD4 monitoring	Arm A (3TC/ABC/NNRTI throughout)	Nevirapine	No	Other
106	60	=	106	Current or previous blip	Male	B	2	-3.355	-2.35623	13	3/4	No CD4 monitoring	Arm A (3TC/ABC/NNRTI throughout)	Nevirapine	No	Other
106	72	<	80	Current or previous blip	Male	B	2	-3.355	-2.35623	13	3/4	No CD4 monitoring	Arm A (3TC/ABC/NNRTI throughout)	Nevirapine	No	Other
106	96	<	80	Current or previous blip	Male	B	2	-3.355	-2.35623	13	3/4	No CD4 monitoring	Arm A (3TC/ABC/NNRTI throughout)	Nevirapine	No	Other
106	108	<	80	Current or previous blip	Male	B	2	-3.355	-2.35623	13	3/4	No CD4 monitoring	Arm A (3TC/ABC/NNRTI throughout)	Nevirapine	No	Other
106	120	=	118	Current or previous blip	Male	B	2	-3.355	-2.35623	13	3/4	No CD4 monitoring	Arm A (3TC/ABC/NNRTI throughout)	Nevirapine	No	Other
106	156	<	80	Current or previous blip	Male	B	2	-3.355	-2.35623	13	3/4	No CD4 monitoring	Arm A (3TC/ABC/NNRTI throughout)	Nevirapine	No	Other
106	168	<	80	Current or previous blip	Male	B	2	-3.355	-2.35623	13	3/4	No CD4 monitoring	Arm A (3TC/ABC/NNRTI throughout)	Nevirapine	No	Other
106	180	<	80	Current or previous blip	Male	B	2	-3.355	-2.35623	13	3/4	No CD4 monitoring	Arm A (3TC/ABC/NNRTI throughout)	Nevirapine	No	Other
107	0	=	462722	Baseline	Female	A	9	-2.005	-1.79348	8	3/4	CD4 monitoring	Arm A (3TC/ABC/NNRTI throughout)	Efavirenz	No	Mother
107	4	=	1144	Viral load response	Female	A	9	-2.005	-1.79348	8	3/4	CD4 monitoring	Arm A (3TC/ABC/NNRTI throughout)	Efavirenz	No	Mother
107	24	<	80	Viral load response	Female	A	9	-2.005	-1.79348	8	3/4	CD4 monitoring	Arm A (3TC/ABC/NNRTI throughout)	Efavirenz	No	Mother
107	48	<	80	Viral load response	Female	A	9	-2.005	-1.79348	8	3/4	CD4 monitoring	Arm A (3TC/ABC/NNRTI throughout)	Efavirenz	No	Mother
107	72	=	195	Current or previous blip	Female	A	9	-2.005	-1.79348	8	3/4	CD4 monitoring	Arm A (3TC/ABC/NNRTI throughout)	Efavirenz	No	Mother
107	96	<	80	Current or previous blip	Female	A	9	-2.005	-1.79348	8	3/4	CD4 monitoring	Arm A (3TC/ABC/NNRTI throughout)	Efavirenz	No	Mother
107	108	<	80	Current or previous blip	Female	A	9	-2.005	-1.79348	8	3/4	CD4 monitoring	Arm A (3TC/ABC/NNRTI throughout)	Efavirenz	No	Mother
107	120	<	80	Current or previous blip	Female	A	9	-2.005	-1.79348	8	3/4	CD4 monitoring	Arm A (3TC/ABC/NNRTI throughout)	Efavirenz	No	Mother
107	144	<	80	Current or previous blip	Female	A	9	-2.005	-1.79348	8	3/4	CD4 monitoring	Arm A (3TC/ABC/NNRTI throughout)	Efavirenz	No	Mother
107	168	<	80	Current or previous blip	Female	A	9	-2.005	-1.79348	8	3/4	CD4 monitoring	Arm A (3TC/ABC/NNRTI throughout)	Efavirenz	No	Mother
107	192	=	2467	Current or previous blip	Female	A	9	-2.005	-1.79348	8	3/4	CD4 monitoring	Arm A (3TC/ABC/NNRTI throughout)	Efavirenz	No	Mother
108	0	=	60273	Baseline	Male	A	8	-3.31	-3.6775	12	3/4	No CD4 monitoring	Arm C (long-term ZDV, 3NRTI after week-36)	Nevirapine	No	Other
108	4	<	80	Viral load response	Male	A	8	-3.31	-3.6775	12	3/4	No CD4 monitoring	Arm C (long-term ZDV, 3NRTI after week-36)	Nevirapine	No	Other
108	24	<	80	Viral load response	Male	A	8	-3.31	-3.6775	12	3/4	No CD4 monitoring	Arm C (long-term ZDV, 3NRTI after week-36)	Nevirapine	No	Other
108	60	<	80	Viral load response	Male	A	8	-3.31	-3.6775	12	3/4	No CD4 monitoring	Arm C (long-term ZDV, 3NRTI after week-36)	Nevirapine	No	Other
108	72	<	80	Viral load response	Male	A	8	-3.31	-3.6775	12	3/4	No CD4 monitoring	Arm C (long-term ZDV, 3NRTI after week-36)	Nevirapine	No	Other
108	96	<	80	Viral load response	Male	A	8	-3.31	-3.6775	12	3/4	No CD4 monitoring	Arm C (long-term ZDV, 3NRTI after week-36)	Nevirapine	No	Other
108	120	<	80	Viral load response	Male	A	8	-3.31	-3.6775	12	3/4	No CD4 monitoring	Arm C (long-term ZDV, 3NRTI after week-36)	Nevirapine	No	Other
108	144	<	80	Viral load response	Male	A	8	-3.31	-3.6775	12	3/4	No CD4 monitoring	Arm C (long-term ZDV, 3NRTI after week-36)	Nevirapine	No	Other
108	168	=	120	Current or previous blip	Male	A	8	-3.31	-3.6775	12	3/4	No CD4 monitoring	Arm C (long-term ZDV, 3NRTI after week-36)	Nevirapine	No	Other
108	192	<	80	Current or previous blip	Male	A	8	-3.31	-3.6775	12	3/4	No CD4 monitoring	Arm C (long-term ZDV, 3NRTI after week-36)	Nevirapine	No	Other
109	4	=	4553	Viral load response	Male	A	5	-3.475	-3.50228	22	3/4	CD4 monitoring	Arm B (36 weeks ZDV)	Efavirenz	No	Other
109	24	<	80	Viral load response	Male	A	5	-3.475	-3.50228	22	3/4	CD4 monitoring	Arm B (36 weeks ZDV)	Efavirenz	No	Other
109	48	<	80	Viral load response	Male	A	5	-3.475	-3.50228	22	3/4	CD4 monitoring	Arm B (36 weeks ZDV)	Efavirenz	No	Other
109	60	<	80	Viral load response	Male	A	5	-3.475	-3.50228	22	3/4	CD4 monitoring	Arm B (36 weeks ZDV)	Efavirenz	No	Other
109	72	<	80	Viral load response	Male	A	5	-3.475	-3.50228	22	3/4	CD4 monitoring	Arm B (36 weeks ZDV)	Efavirenz	No	Other
109	96	<	80	Viral load response	Male	A	5	-3.475	-3.50228	22	3/4	CD4 monitoring	Arm B (36 weeks ZDV)	Efavirenz	No	Other
109	108	<	80	Viral load response	Male	A	5	-3.475	-3.50228	22	3/4	CD4 monitoring	Arm B (36 weeks ZDV)	Efavirenz	No	Other
109	120	<	80	Viral load response	Male	A	5	-3.475	-3.50228	22	3/4	CD4 monitoring	Arm B (36 weeks ZDV)	Efavirenz	No	Other
109	144	=	1002	Current or previous blip	Male	A	5	-3.475	-3.50228	22	3/4	CD4 monitoring	Arm B (36 weeks ZDV)	Efavirenz	No	Other
109	156	<	80	Current or previous blip	Male	A	5	-3.475	-3.50228	22	3/4	CD4 monitoring	Arm B (36 weeks ZDV)	Efavirenz	No	Other
109	168	=	143	Current or previous blip	Male	A	5	-3.475	-3.50228	22	3/4	CD4 monitoring	Arm B (36 weeks ZDV)	Efavirenz	No	Other
109	180	<	80	Current or previous blip	Male	A	5	-3.475	-3.50228	22	3/4	CD4 monitoring	Arm B (36 weeks ZDV)	Efavirenz	No	Other
110	0	=	2280716	Baseline	Female	A	1	-3.13	-5.30941	14	3/4	No CD4 monitoring	Arm C (long-term ZDV, 3NRTI after week-36)	Nevirapine	Yes	Mother
110	4	=	6936	Viral load response	Female	A	1	-3.13	-5.30941	14	3/4	No CD4 monitoring	Arm C (long-term ZDV, 3NRTI after week-36)	Nevirapine	Yes	Mother
110	24	=	294	Viral load response	Female	A	1	-3.13	-5.30941	14	3/4	No CD4 monitoring	Arm C (long-term ZDV, 3NRTI after week-36)	Nevirapine	Yes	Mother
110	36	<	80	Viral load response	Female	A	1	-3.13	-5.30941	14	3/4	No CD4 monitoring	Arm C (long-term ZDV, 3NRTI after week-36)	Nevirapine	Yes	Mother
110	48	<	80	Viral load response	Female	A	1	-3.13	-5.30941	14	3/4	No CD4 monitoring	Arm C (long-term ZDV, 3NRTI after week-36)	Nevirapine	Yes	Mother
110	72	<	80	Viral load response	Female	A	1	-3.13	-5.30941	14	3/4	No CD4 monitoring	Arm C (long-term ZDV, 3NRTI after week-36)	Nevirapine	Yes	Mother
110	108	<	80	Viral load response	Female	A	1	-3.13	-5.30941	14	3/4	No CD4 monitoring	Arm C (long-term ZDV, 3NRTI after week-36)	Nevirapine	Yes	Mother
110	120	<	80	Viral load response	Female	A	1	-3.13	-5.30941	14	3/4	No CD4 monitoring	Arm C (long-term ZDV, 3NRTI after week-36)	Nevirapine	Yes	Mother
110	144	=	130	Current or previous blip	Female	A	1	-3.13	-5.30941	14	3/4	No CD4 monitoring	Arm C (long-term ZDV, 3NRTI after week-36)	Nevirapine	Yes	Mother
110	168	<	80	Current or previous blip	Female	A	1	-3.13	-5.30941	14	3/4	No CD4 monitoring	Arm C (long-term ZDV, 3NRTI after week-36)	Nevirapine	Yes	Mother
110	192	<	80	Current or previous blip	Female	A	1	-3.13	-5.30941	14	3/4	No CD4 monitoring	Arm C (long-term ZDV, 3NRTI after week-36)	Nevirapine	Yes	Mother
111	0	=	392428	Baseline	Female	A	2	-2.845	-2.11436	13	3/4	CD4 monitoring	Arm C (long-term ZDV, 3NRTI after week-36)	Nevirapine	No	Other
111	4	=	1788	Viral load response	Female	A	2	-2.845	-2.11436	13	3/4	CD4 monitoring	Arm C (long-term ZDV, 3NRTI after week-36)	Nevirapine	No	Other
111	24	<	80	Viral load response	Female	A	2	-2.845	-2.11436	13	3/4	CD4 monitoring	Arm C (long-term ZDV, 3NRTI after week-36)	Nevirapine	No	Other
111	36	<	80	Viral load response	Female	A	2	-2.845	-2.11436	13	3/4	CD4 monitoring	Arm C (long-term ZDV, 3NRTI after week-36)	Nevirapine	No	Other
111	60	<	80	Viral load response	Female	A	2	-2.845	-2.11436	13	3/4	CD4 monitoring	Arm C (long-term ZDV, 3NRTI after week-36)	Nevirapine	No	Other
111	96	=	224	Current or previous blip	Female	A	2	-2.845	-2.11436	13	3/4	CD4 monitoring	Arm C (long-term ZDV, 3NRTI after week-36)	Nevirapine	No	Other
111	120	<	80	Current or previous blip	Female	A	2	-2.845	-2.11436	13	3/4	CD4 monitoring	Arm C (long-term ZDV, 3NRTI after week-36)	Nevirapine	No	Other
111	144	<	80	Current or previous blip	Female	A	2	-2.845	-2.11436	13	3/4	CD4 monitoring	Arm C (long-term ZDV, 3NRTI after week-36)	Nevirapine	No	Other
111	168	<	80	Current or previous blip	Female	A	2	-2.845	-2.11436	13	3/4	CD4 monitoring	Arm C (long-term ZDV, 3NRTI after week-36)	Nevirapine	No	Other
111	180	<	80	Current or previous blip	Female	A	2	-2.845	-2.11436	13	3/4	CD4 monitoring	Arm C (long-term ZDV, 3NRTI after week-36)	Nevirapine	No	Other
112	0	=	1292240	Baseline	Male	A	7	-4.02	-3.04892	1	3/4	No CD4 monitoring	Arm A (3TC/ABC/NNRTI throughout)	Efavirenz	No	Other
112	4	=	471	Viral load response	Male	A	7	-4.02	-3.04892	1	3/4	No CD4 monitoring	Arm A (3TC/ABC/NNRTI throughout)	Efavirenz	No	Other
112	36	<	80	Viral load response	Male	A	7	-4.02	-3.04892	1	3/4	No CD4 monitoring	Arm A (3TC/ABC/NNRTI throughout)	Efavirenz	No	Other
112	48	<	80	Viral load response	Male	A	7	-4.02	-3.04892	1	3/4	No CD4 monitoring	Arm A (3TC/ABC/NNRTI throughout)	Efavirenz	No	Other
112	72	<	80	Viral load response	Male	A	7	-4.02	-3.04892	1	3/4	No CD4 monitoring	Arm A (3TC/ABC/NNRTI throughout)	Efavirenz	No	Other
112	84	<	80	Viral load response	Male	A	7	-4.02	-3.04892	1	3/4	No CD4 monitoring	Arm A (3TC/ABC/NNRTI throughout)	Efavirenz	No	Other
112	96	<	80	Viral load response	Male	A	7	-4.02	-3.04892	1	3/4	No CD4 monitoring	Arm A (3TC/ABC/NNRTI throughout)	Efavirenz	No	Other
112	108	<	80	Viral load response	Male	A	7	-4.02	-3.04892	1	3/4	No CD4 monitoring	Arm A (3TC/ABC/NNRTI throughout)	Efavirenz	No	Other
112	120	<	80	Viral load response	Male	A	7	-4.02	-3.04892	1	3/4	No CD4 monitoring	Arm A (3TC/ABC/NNRTI throughout)	Efavirenz	No	Other
112	132	<	80	Viral load response	Male	A	7	-4.02	-3.04892	1	3/4	No CD4 monitoring	Arm A (3TC/ABC/NNRTI throughout)	Efavirenz	No	Other
112	144	=	9048	Current or previous blip	Male	A	7	-4.02	-3.04892	1	3/4	No CD4 monitoring	Arm A (3TC/ABC/NNRTI throughout)	Efavirenz	No	Other
112	168	<	80	Current or previous blip	Male	A	7	-4.02	-3.04892	1	3/4	No CD4 monitoring	Arm A (3TC/ABC/NNRTI throughout)	Efavirenz	No	Other
112	180	<	80	Current or previous blip	Male	A	7	-4.02	-3.04892	1	3/4	No CD4 monitoring	Arm A (3TC/ABC/NNRTI throughout)	Efavirenz	No	Other
112	192	<	80	Current or previous blip	Male	A	7	-4.02	-3.04892	1	3/4	No CD4 monitoring	Arm A (3TC/ABC/NNRTI throughout)	Efavirenz	No	Other
113	0	=	59130	Baseline	Female	A	7	-2.76	-3.60153	12.5	3/4	No CD4 monitoring	Arm A (3TC/ABC/NNRTI throughout)	Efavirenz	No	Mother
113	4	=	96	Viral load response	Female	A	7	-2.76	-3.60153	12.5	3/4	No CD4 monitoring	Arm A (3TC/ABC/NNRTI throughout)	Efavirenz	No	Mother
113	24	<	80	Viral load response	Female	A	7	-2.76	-3.60153	12.5	3/4	No CD4 monitoring	Arm A (3TC/ABC/NNRTI throughout)	Efavirenz	No	Mother
113	36	<	80	Viral load response	Female	A	7	-2.76	-3.60153	12.5	3/4	No CD4 monitoring	Arm A (3TC/ABC/NNRTI throughout)	Efavirenz	No	Mother
113	48	<	80	Viral load response	Female	A	7	-2.76	-3.60153	12.5	3/4	No CD4 monitoring	Arm A (3TC/ABC/NNRTI throughout)	Efavirenz	No	Mother
113	72	<	80	Viral load response	Female	A	7	-2.76	-3.60153	12.5	3/4	No CD4 monitoring	Arm A (3TC/ABC/NNRTI throughout)	Efavirenz	No	Mother
113	84	<	80	Viral load response	Female	A	7	-2.76	-3.60153	12.5	3/4	No CD4 monitoring	Arm A (3TC/ABC/NNRTI throughout)	Efavirenz	No	Mother
113	96	<	80	Viral load response	Female	A	7	-2.76	-3.60153	12.5	3/4	No CD4 monitoring	Arm A (3TC/ABC/NNRTI throughout)	Efavirenz	No	Mother
113	120	<	80	Viral load response	Female	A	7	-2.76	-3.60153	12.5	3/4	No CD4 monitoring	Arm A (3TC/ABC/NNRTI throughout)	Efavirenz	No	Mother
113	132	<	80	Viral load response	Female	A	7	-2.76	-3.60153	12.5	3/4	No CD4 monitoring	Arm A (3TC/ABC/NNRTI throughout)	Efavirenz	No	Mother
113	144	<	80	Viral load response	Female	A	7	-2.76	-3.60153	12.5	3/4	No CD4 monitoring	Arm A (3TC/ABC/NNRTI throughout)	Efavirenz	No	Mother
113	168	<	80	Viral load response	Female	A	7	-2.76	-3.60153	12.5	3/4	No CD4 monitoring	Arm A (3TC/ABC/NNRTI throughout)	Efavirenz	No	Mother
113	180	<	80	Viral load response	Female	A	7	-2.76	-3.60153	12.5	3/4	No CD4 monitoring	Arm A (3TC/ABC/NNRTI throughout)	Efavirenz	No	Mother
113	192	=	121	Current or previous blip	Female	A	7	-2.76	-3.60153	12.5	3/4	No CD4 monitoring	Arm A (3TC/ABC/NNRTI throughout)	Efavirenz	No	Mother
114	0	=	150526	Baseline	Female	C	5	-8.4	-3.81025	13	3/4	CD4 monitoring	Arm B (36 weeks ZDV)	Efavirenz	No	Other
114	4	=	828	Viral load response	Female	C	5	-8.4	-3.81025	13	3/4	CD4 monitoring	Arm B (36 weeks ZDV)	Efavirenz	No	Other
114	24	<	80	Viral load response	Female	C	5	-8.4	-3.81025	13	3/4	CD4 monitoring	Arm B (36 weeks ZDV)	Efavirenz	No	Other
114	36	<	80	Viral load response	Female	C	5	-8.4	-3.81025	13	3/4	CD4 monitoring	Arm B (36 weeks ZDV)	Efavirenz	No	Other
114	48	=	186	Current or previous blip	Female	C	5	-8.4	-3.81025	13	3/4	CD4 monitoring	Arm B (36 weeks ZDV)	Efavirenz	No	Other
114	72	<	80	Current or previous blip	Female	C	5	-8.4	-3.81025	13	3/4	CD4 monitoring	Arm B (36 weeks ZDV)	Efavirenz	No	Other
114	96	<	80	Current or previous blip	Female	C	5	-8.4	-3.81025	13	3/4	CD4 monitoring	Arm B (36 weeks ZDV)	Efavirenz	No	Other
114	120	<	80	Current or previous blip	Female	C	5	-8.4	-3.81025	13	3/4	CD4 monitoring	Arm B (36 weeks ZDV)	Efavirenz	No	Other
114	144	<	80	Current or previous blip	Female	C	5	-8.4	-3.81025	13	3/4	CD4 monitoring	Arm B (36 weeks ZDV)	Efavirenz	No	Other
114	168	<	80	Current or previous blip	Female	C	5	-8.4	-3.81025	13	3/4	CD4 monitoring	Arm B (36 weeks ZDV)	Efavirenz	No	Other
114	192	=	398	Current or previous blip	Female	C	5	-8.4	-3.81025	13	3/4	CD4 monitoring	Arm B (36 weeks ZDV)	Efavirenz	No	Other
115	0	=	745972	Baseline	Male	C	2	-4.36	-2.13569	14	1/2	CD4 monitoring	Arm C (long-term ZDV, 3NRTI after week-36)	Nevirapine	Yes	Mother
115	4	=	944	Viral load response	Male	C	2	-4.36	-2.13569	14	1/2	CD4 monitoring	Arm C (long-term ZDV, 3NRTI after week-36)	Nevirapine	Yes	Mother
115	24	<	80	Viral load response	Male	C	2	-4.36	-2.13569	14	1/2	CD4 monitoring	Arm C (long-term ZDV, 3NRTI after week-36)	Nevirapine	Yes	Mother
115	36	<	80	Viral load response	Male	C	2	-4.36	-2.13569	14	1/2	CD4 monitoring	Arm C (long-term ZDV, 3NRTI after week-36)	Nevirapine	Yes	Mother
115	48	<	80	Viral load response	Male	C	2	-4.36	-2.13569	14	1/2	CD4 monitoring	Arm C (long-term ZDV, 3NRTI after week-36)	Nevirapine	Yes	Mother
115	72	<	80	Viral load response	Male	C	2	-4.36	-2.13569	14	1/2	CD4 monitoring	Arm C (long-term ZDV, 3NRTI after week-36)	Nevirapine	Yes	Mother
115	84	<	80	Viral load response	Male	C	2	-4.36	-2.13569	14	1/2	CD4 monitoring	Arm C (long-term ZDV, 3NRTI after week-36)	Nevirapine	Yes	Mother
115	96	<	80	Viral load response	Male	C	2	-4.36	-2.13569	14	1/2	CD4 monitoring	Arm C (long-term ZDV, 3NRTI after week-36)	Nevirapine	Yes	Mother
115	120	<	80	Viral load response	Male	C	2	-4.36	-2.13569	14	1/2	CD4 monitoring	Arm C (long-term ZDV, 3NRTI after week-36)	Nevirapine	Yes	Mother
115	132	<	80	Viral load response	Male	C	2	-4.36	-2.13569	14	1/2	CD4 monitoring	Arm C (long-term ZDV, 3NRTI after week-36)	Nevirapine	Yes	Mother
115	144	<	80	Viral load response	Male	C	2	-4.36	-2.13569	14	1/2	CD4 monitoring	Arm C (long-term ZDV, 3NRTI after week-36)	Nevirapine	Yes	Mother
115	168	=	59966	Current or previous blip	Male	C	2	-4.36	-2.13569	14	1/2	CD4 monitoring	Arm C (long-term ZDV, 3NRTI after week-36)	Nevirapine	Yes	Mother
115	180	<	80	Current or previous blip	Male	C	2	-4.36	-2.13569	14	1/2	CD4 monitoring	Arm C (long-term ZDV, 3NRTI after week-36)	Nevirapine	Yes	Mother
115	192	<	80	Current or previous blip	Male	C	2	-4.36	-2.13569	14	1/2	CD4 monitoring	Arm C (long-term ZDV, 3NRTI after week-36)	Nevirapine	Yes	Mother
115	204	<	80	Current or previous blip	Male	C	2	-4.36	-2.13569	14	1/2	CD4 monitoring	Arm C (long-term ZDV, 3NRTI after week-36)	Nevirapine	Yes	Mother
116	0	=	134174	Baseline	Male	A	1	-3.415	-2.13283	15.5	3/4	No CD4 monitoring	Arm A (3TC/ABC/NNRTI throughout)	Nevirapine	No	Mother
116	4	=	1710	Viral load response	Male	A	1	-3.415	-2.13283	15.5	3/4	No CD4 monitoring	Arm A (3TC/ABC/NNRTI throughout)	Nevirapine	No	Mother
116	24	=	90	Viral load response	Male	A	1	-3.415	-2.13283	15.5	3/4	No CD4 monitoring	Arm A (3TC/ABC/NNRTI throughout)	Nevirapine	No	Mother
116	36	<	80	Viral load response	Male	A	1	-3.415	-2.13283	15.5	3/4	No CD4 monitoring	Arm A (3TC/ABC/NNRTI throughout)	Nevirapine	No	Mother
116	48	<	80	Viral load response	Male	A	1	-3.415	-2.13283	15.5	3/4	No CD4 monitoring	Arm A (3TC/ABC/NNRTI throughout)	Nevirapine	No	Mother
116	84	<	80	Viral load response	Male	A	1	-3.415	-2.13283	15.5	3/4	No CD4 monitoring	Arm A (3TC/ABC/NNRTI throughout)	Nevirapine	No	Mother
116	120	<	80	Viral load response	Male	A	1	-3.415	-2.13283	15.5	3/4	No CD4 monitoring	Arm A (3TC/ABC/NNRTI throughout)	Nevirapine	No	Mother
116	132	<	80	Viral load response	Male	A	1	-3.415	-2.13283	15.5	3/4	No CD4 monitoring	Arm A (3TC/ABC/NNRTI throughout)	Nevirapine	No	Mother
116	144	=	185	Current or previous blip	Male	A	1	-3.415	-2.13283	15.5	3/4	No CD4 monitoring	Arm A (3TC/ABC/NNRTI throughout)	Nevirapine	No	Mother
116	168	<	80	Current or previous blip	Male	A	1	-3.415	-2.13283	15.5	3/4	No CD4 monitoring	Arm A (3TC/ABC/NNRTI throughout)	Nevirapine	No	Mother
116	180	<	80	Current or previous blip	Male	A	1	-3.415	-2.13283	15.5	3/4	No CD4 monitoring	Arm A (3TC/ABC/NNRTI throughout)	Nevirapine	No	Mother
116	192	<	80	Current or previous blip	Male	A	1	-3.415	-2.13283	15.5	3/4	No CD4 monitoring	Arm A (3TC/ABC/NNRTI throughout)	Nevirapine	No	Mother
117	0	=	2066882	Baseline	Female	C	1	-1.39	-2.24816	18	1/2	No CD4 monitoring	Arm C (long-term ZDV, 3NRTI after week-36)	Nevirapine	No	Mother
117	4	=	2164	Viral load response	Female	C	1	-1.39	-2.24816	18	1/2	No CD4 monitoring	Arm C (long-term ZDV, 3NRTI after week-36)	Nevirapine	No	Mother
117	24	<	80	Viral load response	Female	C	1	-1.39	-2.24816	18	1/2	No CD4 monitoring	Arm C (long-term ZDV, 3NRTI after week-36)	Nevirapine	No	Mother
117	36	<	80	Viral load response	Female	C	1	-1.39	-2.24816	18	1/2	No CD4 monitoring	Arm C (long-term ZDV, 3NRTI after week-36)	Nevirapine	No	Mother
117	48	<	80	Viral load response	Female	C	1	-1.39	-2.24816	18	1/2	No CD4 monitoring	Arm C (long-term ZDV, 3NRTI after week-36)	Nevirapine	No	Mother
117	72	=	104	Current or previous blip	Female	C	1	-1.39	-2.24816	18	1/2	No CD4 monitoring	Arm C (long-term ZDV, 3NRTI after week-36)	Nevirapine	No	Mother
117	84	<	80	Current or previous blip	Female	C	1	-1.39	-2.24816	18	1/2	No CD4 monitoring	Arm C (long-term ZDV, 3NRTI after week-36)	Nevirapine	No	Mother
117	96	<	80	Current or previous blip	Female	C	1	-1.39	-2.24816	18	1/2	No CD4 monitoring	Arm C (long-term ZDV, 3NRTI after week-36)	Nevirapine	No	Mother
117	120	<	80	Current or previous blip	Female	C	1	-1.39	-2.24816	18	1/2	No CD4 monitoring	Arm C (long-term ZDV, 3NRTI after week-36)	Nevirapine	No	Mother
117	132	<	80	Current or previous blip	Female	C	1	-1.39	-2.24816	18	1/2	No CD4 monitoring	Arm C (long-term ZDV, 3NRTI after week-36)	Nevirapine	No	Mother
117	144	<	80	Current or previous blip	Female	C	1	-1.39	-2.24816	18	1/2	No CD4 monitoring	Arm C (long-term ZDV, 3NRTI after week-36)	Nevirapine	No	Mother
117	168	<	80	Current or previous blip	Female	C	1	-1.39	-2.24816	18	1/2	No CD4 monitoring	Arm C (long-term ZDV, 3NRTI after week-36)	Nevirapine	No	Mother
117	180	<	80	Current or previous blip	Female	C	1	-1.39	-2.24816	18	1/2	No CD4 monitoring	Arm C (long-term ZDV, 3NRTI after week-36)	Nevirapine	No	Mother
117	204	<	80	Current or previous blip	Female	C	1	-1.39	-2.24816	18	1/2	No CD4 monitoring	Arm C (long-term ZDV, 3NRTI after week-36)	Nevirapine	No	Mother
118	0	=	588	Baseline	Female	B	6	0.09	0.0521468	33.5	3/4	CD4 monitoring	Arm B (36 weeks ZDV)	Nevirapine	No	Mother
118	24	<	80	Viral load response	Female	B	6	0.09	0.0521468	33.5	3/4	CD4 monitoring	Arm B (36 weeks ZDV)	Nevirapine	No	Mother
118	36	<	80	Viral load response	Female	B	6	0.09	0.0521468	33.5	3/4	CD4 monitoring	Arm B (36 weeks ZDV)	Nevirapine	No	Mother
118	48	<	80	Viral load response	Female	B	6	0.09	0.0521468	33.5	3/4	CD4 monitoring	Arm B (36 weeks ZDV)	Nevirapine	No	Mother
118	60	=	114	Current or previous blip	Female	B	6	0.09	0.0521468	33.5	3/4	CD4 monitoring	Arm B (36 weeks ZDV)	Nevirapine	No	Mother
118	72	<	80	Current or previous blip	Female	B	6	0.09	0.0521468	33.5	3/4	CD4 monitoring	Arm B (36 weeks ZDV)	Nevirapine	No	Mother
118	96	<	80	Current or previous blip	Female	B	6	0.09	0.0521468	33.5	3/4	CD4 monitoring	Arm B (36 weeks ZDV)	Nevirapine	No	Mother
118	108	<	80	Current or previous blip	Female	B	6	0.09	0.0521468	33.5	3/4	CD4 monitoring	Arm B (36 weeks ZDV)	Nevirapine	No	Mother
118	120	<	80	Current or previous blip	Female	B	6	0.09	0.0521468	33.5	3/4	CD4 monitoring	Arm B (36 weeks ZDV)	Nevirapine	No	Mother
118	144	<	80	Current or previous blip	Female	B	6	0.09	0.0521468	33.5	3/4	CD4 monitoring	Arm B (36 weeks ZDV)	Nevirapine	No	Mother
118	156	<	80	Current or previous blip	Female	B	6	0.09	0.0521468	33.5	3/4	CD4 monitoring	Arm B (36 weeks ZDV)	Nevirapine	No	Mother
118	168	<	80	Current or previous blip	Female	B	6	0.09	0.0521468	33.5	3/4	CD4 monitoring	Arm B (36 weeks ZDV)	Nevirapine	No	Mother
118	192	<	80	Current or previous blip	Female	B	6	0.09	0.0521468	33.5	3/4	CD4 monitoring	Arm B (36 weeks ZDV)	Nevirapine	No	Mother
119	0	=	36256	Baseline	Female	A	3	-2.76	-0.948298	37	3/4	CD4 monitoring	Arm B (36 weeks ZDV)	Nevirapine	No	Mother
119	4	=	762	Viral load response	Female	A	3	-2.76	-0.948298	37	3/4	CD4 monitoring	Arm B (36 weeks ZDV)	Nevirapine	No	Mother
119	24	<	80	Viral load response	Female	A	3	-2.76	-0.948298	37	3/4	CD4 monitoring	Arm B (36 weeks ZDV)	Nevirapine	No	Mother
119	36	<	80	Viral load response	Female	A	3	-2.76	-0.948298	37	3/4	CD4 monitoring	Arm B (36 weeks ZDV)	Nevirapine	No	Mother
119	48	<	80	Viral load response	Female	A	3	-2.76	-0.948298	37	3/4	CD4 monitoring	Arm B (36 weeks ZDV)	Nevirapine	No	Mother
119	72	<	80	Viral load response	Female	A	3	-2.76	-0.948298	37	3/4	CD4 monitoring	Arm B (36 weeks ZDV)	Nevirapine	No	Mother
119	96	<	80	Viral load response	Female	A	3	-2.76	-0.948298	37	3/4	CD4 monitoring	Arm B (36 weeks ZDV)	Nevirapine	No	Mother
119	120	=	162	Current or previous blip	Female	A	3	-2.76	-0.948298	37	3/4	CD4 monitoring	Arm B (36 weeks ZDV)	Nevirapine	No	Mother
119	144	<	80	Current or previous blip	Female	A	3	-2.76	-0.948298	37	3/4	CD4 monitoring	Arm B (36 weeks ZDV)	Nevirapine	No	Mother
119	168	<	80	Current or previous blip	Female	A	3	-2.76	-0.948298	37	3/4	CD4 monitoring	Arm B (36 weeks ZDV)	Nevirapine	No	Mother
119	180	<	80	Current or previous blip	Female	A	3	-2.76	-0.948298	37	3/4	CD4 monitoring	Arm B (36 weeks ZDV)	Nevirapine	No	Mother
120	0	=	48906	Baseline	Male	A	11	-2.76	-2.19964	6	3/4	No CD4 monitoring	Arm A (3TC/ABC/NNRTI throughout)	Efavirenz	No	Mother
120	4	=	133	Viral load response	Male	A	11	-2.76	-2.19964	6	3/4	No CD4 monitoring	Arm A (3TC/ABC/NNRTI throughout)	Efavirenz	No	Mother
120	36	<	80	Viral load response	Male	A	11	-2.76	-2.19964	6	3/4	No CD4 monitoring	Arm A (3TC/ABC/NNRTI throughout)	Efavirenz	No	Mother
120	48	<	80	Viral load response	Male	A	11	-2.76	-2.19964	6	3/4	No CD4 monitoring	Arm A (3TC/ABC/NNRTI throughout)	Efavirenz	No	Mother
120	72	=	94	Current or previous blip	Male	A	11	-2.76	-2.19964	6	3/4	No CD4 monitoring	Arm A (3TC/ABC/NNRTI throughout)	Efavirenz	No	Mother
120	96	<	80	Current or previous blip	Male	A	11	-2.76	-2.19964	6	3/4	No CD4 monitoring	Arm A (3TC/ABC/NNRTI throughout)	Efavirenz	No	Mother
120	108	<	80	Current or previous blip	Male	A	11	-2.76	-2.19964	6	3/4	No CD4 monitoring	Arm A (3TC/ABC/NNRTI throughout)	Efavirenz	No	Mother
120	120	<	80	Current or previous blip	Male	A	11	-2.76	-2.19964	6	3/4	No CD4 monitoring	Arm A (3TC/ABC/NNRTI throughout)	Efavirenz	No	Mother
120	144	=	399	Current or previous blip	Male	A	11	-2.76	-2.19964	6	3/4	No CD4 monitoring	Arm A (3TC/ABC/NNRTI throughout)	Efavirenz	No	Mother
120	168	<	80	Current or previous blip	Male	A	11	-2.76	-2.19964	6	3/4	No CD4 monitoring	Arm A (3TC/ABC/NNRTI throughout)	Efavirenz	No	Mother
120	192	=	1340	Current or previous blip	Male	A	11	-2.76	-2.19964	6	3/4	No CD4 monitoring	Arm A (3TC/ABC/NNRTI throughout)	Efavirenz	No	Mother
121	0	=	5436454	Baseline	Male	D	0	-2.84	-3.3421	13	3/4	No CD4 monitoring	Arm B (36 weeks ZDV)	Nevirapine	No	Mother
121	4	=	854	Viral load response	Male	D	0	-2.84	-3.3421	13	3/4	No CD4 monitoring	Arm B (36 weeks ZDV)	Nevirapine	No	Mother
121	24	=	92	Viral load response	Male	D	0	-2.84	-3.3421	13	3/4	No CD4 monitoring	Arm B (36 weeks ZDV)	Nevirapine	No	Mother
121	36	<	80	Viral load response	Male	D	0	-2.84	-3.3421	13	3/4	No CD4 monitoring	Arm B (36 weeks ZDV)	Nevirapine	No	Mother
121	60	=	280	Current or previous blip	Male	D	0	-2.84	-3.3421	13	3/4	No CD4 monitoring	Arm B (36 weeks ZDV)	Nevirapine	No	Mother
121	72	<	80	Current or previous blip	Male	D	0	-2.84	-3.3421	13	3/4	No CD4 monitoring	Arm B (36 weeks ZDV)	Nevirapine	No	Mother
121	96	<	80	Current or previous blip	Male	D	0	-2.84	-3.3421	13	3/4	No CD4 monitoring	Arm B (36 weeks ZDV)	Nevirapine	No	Mother
121	120	<	80	Current or previous blip	Male	D	0	-2.84	-3.3421	13	3/4	No CD4 monitoring	Arm B (36 weeks ZDV)	Nevirapine	No	Mother
121	144	<	80	Current or previous blip	Male	D	0	-2.84	-3.3421	13	3/4	No CD4 monitoring	Arm B (36 weeks ZDV)	Nevirapine	No	Mother
121	168	<	80	Current or previous blip	Male	D	0	-2.84	-3.3421	13	3/4	No CD4 monitoring	Arm B (36 weeks ZDV)	Nevirapine	No	Mother
121	192	<	80	Current or previous blip	Male	D	0	-2.84	-3.3421	13	3/4	No CD4 monitoring	Arm B (36 weeks ZDV)	Nevirapine	No	Mother
122	0	=	130412	Baseline	Female	D	3	-5.195	-3.01514	18	3/4	CD4 monitoring	Arm A (3TC/ABC/NNRTI throughout)	Nevirapine	No	Other
122	12	=	1002	Viral load response	Female	D	3	-5.195	-3.01514	18	3/4	CD4 monitoring	Arm A (3TC/ABC/NNRTI throughout)	Nevirapine	No	Other
122	24	<	80	Viral load response	Female	D	3	-5.195	-3.01514	18	3/4	CD4 monitoring	Arm A (3TC/ABC/NNRTI throughout)	Nevirapine	No	Other
122	36	<	80	Viral load response	Female	D	3	-5.195	-3.01514	18	3/4	CD4 monitoring	Arm A (3TC/ABC/NNRTI throughout)	Nevirapine	No	Other
122	48	<	80	Viral load response	Female	D	3	-5.195	-3.01514	18	3/4	CD4 monitoring	Arm A (3TC/ABC/NNRTI throughout)	Nevirapine	No	Other
122	72	<	80	Viral load response	Female	D	3	-5.195	-3.01514	18	3/4	CD4 monitoring	Arm A (3TC/ABC/NNRTI throughout)	Nevirapine	No	Other
122	96	<	80	Viral load response	Female	D	3	-5.195	-3.01514	18	3/4	CD4 monitoring	Arm A (3TC/ABC/NNRTI throughout)	Nevirapine	No	Other
122	132	<	80	Viral load response	Female	D	3	-5.195	-3.01514	18	3/4	CD4 monitoring	Arm A (3TC/ABC/NNRTI throughout)	Nevirapine	No	Other
122	144	=	8942	Current or previous blip	Female	D	3	-5.195	-3.01514	18	3/4	CD4 monitoring	Arm A (3TC/ABC/NNRTI throughout)	Nevirapine	No	Other
122	168	<	80	Current or previous blip	Female	D	3	-5.195	-3.01514	18	3/4	CD4 monitoring	Arm A (3TC/ABC/NNRTI throughout)	Nevirapine	No	Other
122	192	<	80	Current or previous blip	Female	D	3	-5.195	-3.01514	18	3/4	CD4 monitoring	Arm A (3TC/ABC/NNRTI throughout)	Nevirapine	No	Other
123	0	=	18421	Baseline	Female	A	2	-3.37	-0.879421	21.5	3/4	No CD4 monitoring	Arm C (long-term ZDV, 3NRTI after week-36)	Nevirapine	Yes	Mother
123	4	<	80	Viral load response	Female	A	2	-3.37	-0.879421	21.5	3/4	No CD4 monitoring	Arm C (long-term ZDV, 3NRTI after week-36)	Nevirapine	Yes	Mother
123	24	<	80	Viral load response	Female	A	2	-3.37	-0.879421	21.5	3/4	No CD4 monitoring	Arm C (long-term ZDV, 3NRTI after week-36)	Nevirapine	Yes	Mother
123	36	<	80	Viral load response	Female	A	2	-3.37	-0.879421	21.5	3/4	No CD4 monitoring	Arm C (long-term ZDV, 3NRTI after week-36)	Nevirapine	Yes	Mother
123	48	<	80	Viral load response	Female	A	2	-3.37	-0.879421	21.5	3/4	No CD4 monitoring	Arm C (long-term ZDV, 3NRTI after week-36)	Nevirapine	Yes	Mother
123	84	<	80	Viral load response	Female	A	2	-3.37	-0.879421	21.5	3/4	No CD4 monitoring	Arm C (long-term ZDV, 3NRTI after week-36)	Nevirapine	Yes	Mother
123	96	=	134	Current or previous blip	Female	A	2	-3.37	-0.879421	21.5	3/4	No CD4 monitoring	Arm C (long-term ZDV, 3NRTI after week-36)	Nevirapine	Yes	Mother
123	120	<	80	Current or previous blip	Female	A	2	-3.37	-0.879421	21.5	3/4	No CD4 monitoring	Arm C (long-term ZDV, 3NRTI after week-36)	Nevirapine	Yes	Mother
123	132	<	80	Current or previous blip	Female	A	2	-3.37	-0.879421	21.5	3/4	No CD4 monitoring	Arm C (long-term ZDV, 3NRTI after week-36)	Nevirapine	Yes	Mother
123	168	<	80	Current or previous blip	Female	A	2	-3.37	-0.879421	21.5	3/4	No CD4 monitoring	Arm C (long-term ZDV, 3NRTI after week-36)	Nevirapine	Yes	Mother
123	180	<	80	Current or previous blip	Female	A	2	-3.37	-0.879421	21.5	3/4	No CD4 monitoring	Arm C (long-term ZDV, 3NRTI after week-36)	Nevirapine	Yes	Mother
124	0	=	443199	Baseline	Male	A	3	-4.065	-2.82593	6.6	1/2	CD4 monitoring	Arm B (36 weeks ZDV)	Nevirapine	No	Mother
124	4	=	2580	Viral load response	Male	A	3	-4.065	-2.82593	6.6	1/2	CD4 monitoring	Arm B (36 weeks ZDV)	Nevirapine	No	Mother
124	24	<	80	Viral load response	Male	A	3	-4.065	-2.82593	6.6	1/2	CD4 monitoring	Arm B (36 weeks ZDV)	Nevirapine	No	Mother
124	36	<	80	Viral load response	Male	A	3	-4.065	-2.82593	6.6	1/2	CD4 monitoring	Arm B (36 weeks ZDV)	Nevirapine	No	Mother
124	48	<	80	Viral load response	Male	A	3	-4.065	-2.82593	6.6	1/2	CD4 monitoring	Arm B (36 weeks ZDV)	Nevirapine	No	Mother
124	72	<	80	Viral load response	Male	A	3	-4.065	-2.82593	6.6	1/2	CD4 monitoring	Arm B (36 weeks ZDV)	Nevirapine	No	Mother
124	108	<	80	Viral load response	Male	A	3	-4.065	-2.82593	6.6	1/2	CD4 monitoring	Arm B (36 weeks ZDV)	Nevirapine	No	Mother
124	120	<	80	Viral load response	Male	A	3	-4.065	-2.82593	6.6	1/2	CD4 monitoring	Arm B (36 weeks ZDV)	Nevirapine	No	Mother
124	132	<	80	Viral load response	Male	A	3	-4.065	-2.82593	6.6	1/2	CD4 monitoring	Arm B (36 weeks ZDV)	Nevirapine	No	Mother
124	144	=	555	Current or previous blip	Male	A	3	-4.065	-2.82593	6.6	1/2	CD4 monitoring	Arm B (36 weeks ZDV)	Nevirapine	No	Mother
124	168	<	80	Current or previous blip	Male	A	3	-4.065	-2.82593	6.6	1/2	CD4 monitoring	Arm B (36 weeks ZDV)	Nevirapine	No	Mother
124	192	<	80	Current or previous blip	Male	A	3	-4.065	-2.82593	6.6	1/2	CD4 monitoring	Arm B (36 weeks ZDV)	Nevirapine	No	Mother
125	0	=	25177	Baseline	Female	A	2	-2.6	-0.58574	7.5	3/4	CD4 monitoring	Arm B (36 weeks ZDV)	Nevirapine	No	Mother
125	4	=	535	Viral load response	Female	A	2	-2.6	-0.58574	7.5	3/4	CD4 monitoring	Arm B (36 weeks ZDV)	Nevirapine	No	Mother
125	24	<	80	Viral load response	Female	A	2	-2.6	-0.58574	7.5	3/4	CD4 monitoring	Arm B (36 weeks ZDV)	Nevirapine	No	Mother
125	36	<	80	Viral load response	Female	A	2	-2.6	-0.58574	7.5	3/4	CD4 monitoring	Arm B (36 weeks ZDV)	Nevirapine	No	Mother
125	48	=	102	Current or previous blip	Female	A	2	-2.6	-0.58574	7.5	3/4	CD4 monitoring	Arm B (36 weeks ZDV)	Nevirapine	No	Mother
125	72	<	80	Current or previous blip	Female	A	2	-2.6	-0.58574	7.5	3/4	CD4 monitoring	Arm B (36 weeks ZDV)	Nevirapine	No	Mother
125	96	<	80	Current or previous blip	Female	A	2	-2.6	-0.58574	7.5	3/4	CD4 monitoring	Arm B (36 weeks ZDV)	Nevirapine	No	Mother
125	120	<	80	Current or previous blip	Female	A	2	-2.6	-0.58574	7.5	3/4	CD4 monitoring	Arm B (36 weeks ZDV)	Nevirapine	No	Mother
125	144	<	80	Current or previous blip	Female	A	2	-2.6	-0.58574	7.5	3/4	CD4 monitoring	Arm B (36 weeks ZDV)	Nevirapine	No	Mother
125	168	=	804	Current or previous blip	Female	A	2	-2.6	-0.58574	7.5	3/4	CD4 monitoring	Arm B (36 weeks ZDV)	Nevirapine	No	Mother
125	192	<	80	Current or previous blip	Female	A	2	-2.6	-0.58574	7.5	3/4	CD4 monitoring	Arm B (36 weeks ZDV)	Nevirapine	No	Mother
126	0	=	117250	Baseline	Female	C	2	-2.145	-2.42857	4	3/4	CD4 monitoring	Arm A (3TC/ABC/NNRTI throughout)	Nevirapine	No	Other
126	4	=	416	Viral load response	Female	C	2	-2.145	-2.42857	4	3/4	CD4 monitoring	Arm A (3TC/ABC/NNRTI throughout)	Nevirapine	No	Other
126	24	<	80	Viral load response	Female	C	2	-2.145	-2.42857	4	3/4	CD4 monitoring	Arm A (3TC/ABC/NNRTI throughout)	Nevirapine	No	Other
126	36	<	80	Viral load response	Female	C	2	-2.145	-2.42857	4	3/4	CD4 monitoring	Arm A (3TC/ABC/NNRTI throughout)	Nevirapine	No	Other
126	48	<	80	Viral load response	Female	C	2	-2.145	-2.42857	4	3/4	CD4 monitoring	Arm A (3TC/ABC/NNRTI throughout)	Nevirapine	No	Other
126	60	<	80	Viral load response	Female	C	2	-2.145	-2.42857	4	3/4	CD4 monitoring	Arm A (3TC/ABC/NNRTI throughout)	Nevirapine	No	Other
126	72	<	80	Viral load response	Female	C	2	-2.145	-2.42857	4	3/4	CD4 monitoring	Arm A (3TC/ABC/NNRTI throughout)	Nevirapine	No	Other
126	96	<	80	Viral load response	Female	C	2	-2.145	-2.42857	4	3/4	CD4 monitoring	Arm A (3TC/ABC/NNRTI throughout)	Nevirapine	No	Other
126	108	<	80	Viral load response	Female	C	2	-2.145	-2.42857	4	3/4	CD4 monitoring	Arm A (3TC/ABC/NNRTI throughout)	Nevirapine	No	Other
126	120	=	80	Current or previous blip	Female	C	2	-2.145	-2.42857	4	3/4	CD4 monitoring	Arm A (3TC/ABC/NNRTI throughout)	Nevirapine	No	Other
126	144	<	80	Current or previous blip	Female	C	2	-2.145	-2.42857	4	3/4	CD4 monitoring	Arm A (3TC/ABC/NNRTI throughout)	Nevirapine	No	Other
126	156	<	80	Current or previous blip	Female	C	2	-2.145	-2.42857	4	3/4	CD4 monitoring	Arm A (3TC/ABC/NNRTI throughout)	Nevirapine	No	Other
126	168	<	80	Current or previous blip	Female	C	2	-2.145	-2.42857	4	3/4	CD4 monitoring	Arm A (3TC/ABC/NNRTI throughout)	Nevirapine	No	Other
126	180	<	80	Current or previous blip	Female	C	2	-2.145	-2.42857	4	3/4	CD4 monitoring	Arm A (3TC/ABC/NNRTI throughout)	Nevirapine	No	Other
127	0	=	66085	Baseline	Female	A	2	-4.115	-2.81259	13	3/4	CD4 monitoring	Arm C (long-term ZDV, 3NRTI after week-36)	Nevirapine	No	Other
127	4	=	964	Viral load response	Female	A	2	-4.115	-2.81259	13	3/4	CD4 monitoring	Arm C (long-term ZDV, 3NRTI after week-36)	Nevirapine	No	Other
127	36	<	80	Viral load response	Female	A	2	-4.115	-2.81259	13	3/4	CD4 monitoring	Arm C (long-term ZDV, 3NRTI after week-36)	Nevirapine	No	Other
127	48	<	80	Viral load response	Female	A	2	-4.115	-2.81259	13	3/4	CD4 monitoring	Arm C (long-term ZDV, 3NRTI after week-36)	Nevirapine	No	Other
127	72	<	80	Viral load response	Female	A	2	-4.115	-2.81259	13	3/4	CD4 monitoring	Arm C (long-term ZDV, 3NRTI after week-36)	Nevirapine	No	Other
127	120	<	80	Viral load response	Female	A	2	-4.115	-2.81259	13	3/4	CD4 monitoring	Arm C (long-term ZDV, 3NRTI after week-36)	Nevirapine	No	Other
127	144	=	270	Current or previous blip	Female	A	2	-4.115	-2.81259	13	3/4	CD4 monitoring	Arm C (long-term ZDV, 3NRTI after week-36)	Nevirapine	No	Other
127	168	<	80	Current or previous blip	Female	A	2	-4.115	-2.81259	13	3/4	CD4 monitoring	Arm C (long-term ZDV, 3NRTI after week-36)	Nevirapine	No	Other
127	192	<	80	Current or previous blip	Female	A	2	-4.115	-2.81259	13	3/4	CD4 monitoring	Arm C (long-term ZDV, 3NRTI after week-36)	Nevirapine	No	Other
128	0	=	70432	Baseline	Male	A	8	-1.905	-1.35572	8.5	1/2	CD4 monitoring	Arm A (3TC/ABC/NNRTI throughout)	Nevirapine	No	Mother
128	4	=	589	Viral load response	Male	A	8	-1.905	-1.35572	8.5	1/2	CD4 monitoring	Arm A (3TC/ABC/NNRTI throughout)	Nevirapine	No	Mother
128	24	<	80	Viral load response	Male	A	8	-1.905	-1.35572	8.5	1/2	CD4 monitoring	Arm A (3TC/ABC/NNRTI throughout)	Nevirapine	No	Mother
128	36	<	80	Viral load response	Male	A	8	-1.905	-1.35572	8.5	1/2	CD4 monitoring	Arm A (3TC/ABC/NNRTI throughout)	Nevirapine	No	Mother
128	60	<	80	Viral load response	Male	A	8	-1.905	-1.35572	8.5	1/2	CD4 monitoring	Arm A (3TC/ABC/NNRTI throughout)	Nevirapine	No	Mother
128	72	<	80	Viral load response	Male	A	8	-1.905	-1.35572	8.5	1/2	CD4 monitoring	Arm A (3TC/ABC/NNRTI throughout)	Nevirapine	No	Mother
128	96	<	80	Viral load response	Male	A	8	-1.905	-1.35572	8.5	1/2	CD4 monitoring	Arm A (3TC/ABC/NNRTI throughout)	Nevirapine	No	Mother
128	120	<	80	Viral load response	Male	A	8	-1.905	-1.35572	8.5	1/2	CD4 monitoring	Arm A (3TC/ABC/NNRTI throughout)	Nevirapine	No	Mother
128	144	<	80	Viral load response	Male	A	8	-1.905	-1.35572	8.5	1/2	CD4 monitoring	Arm A (3TC/ABC/NNRTI throughout)	Nevirapine	No	Mother
128	168	<	80	Viral load response	Male	A	8	-1.905	-1.35572	8.5	1/2	CD4 monitoring	Arm A (3TC/ABC/NNRTI throughout)	Nevirapine	No	Mother
128	192	=	1049	Current or previous blip	Male	A	8	-1.905	-1.35572	8.5	1/2	CD4 monitoring	Arm A (3TC/ABC/NNRTI throughout)	Nevirapine	No	Mother
129	0	=	28000	Baseline	Female	A	6	-2.47	-1.89101	23.5	3/4	No CD4 monitoring	Arm C (long-term ZDV, 3NRTI after week-36)	Efavirenz	No	Mother
129	4	=	82	Viral load response	Female	A	6	-2.47	-1.89101	23.5	3/4	No CD4 monitoring	Arm C (long-term ZDV, 3NRTI after week-36)	Efavirenz	No	Mother
129	24	<	80	Viral load response	Female	A	6	-2.47	-1.89101	23.5	3/4	No CD4 monitoring	Arm C (long-term ZDV, 3NRTI after week-36)	Efavirenz	No	Mother
129	36	<	80	Viral load response	Female	A	6	-2.47	-1.89101	23.5	3/4	No CD4 monitoring	Arm C (long-term ZDV, 3NRTI after week-36)	Efavirenz	No	Mother
129	48	<	80	Viral load response	Female	A	6	-2.47	-1.89101	23.5	3/4	No CD4 monitoring	Arm C (long-term ZDV, 3NRTI after week-36)	Efavirenz	No	Mother
129	72	=	3213	Current or previous blip	Female	A	6	-2.47	-1.89101	23.5	3/4	No CD4 monitoring	Arm C (long-term ZDV, 3NRTI after week-36)	Efavirenz	No	Mother
129	84	<	80	Current or previous blip	Female	A	6	-2.47	-1.89101	23.5	3/4	No CD4 monitoring	Arm C (long-term ZDV, 3NRTI after week-36)	Efavirenz	No	Mother
129	96	<	80	Current or previous blip	Female	A	6	-2.47	-1.89101	23.5	3/4	No CD4 monitoring	Arm C (long-term ZDV, 3NRTI after week-36)	Efavirenz	No	Mother
129	120	<	80	Current or previous blip	Female	A	6	-2.47	-1.89101	23.5	3/4	No CD4 monitoring	Arm C (long-term ZDV, 3NRTI after week-36)	Efavirenz	No	Mother
129	132	<	80	Current or previous blip	Female	A	6	-2.47	-1.89101	23.5	3/4	No CD4 monitoring	Arm C (long-term ZDV, 3NRTI after week-36)	Efavirenz	No	Mother
129	144	<	80	Current or previous blip	Female	A	6	-2.47	-1.89101	23.5	3/4	No CD4 monitoring	Arm C (long-term ZDV, 3NRTI after week-36)	Efavirenz	No	Mother
129	168	<	80	Current or previous blip	Female	A	6	-2.47	-1.89101	23.5	3/4	No CD4 monitoring	Arm C (long-term ZDV, 3NRTI after week-36)	Efavirenz	No	Mother
129	180	<	80	Current or previous blip	Female	A	6	-2.47	-1.89101	23.5	3/4	No CD4 monitoring	Arm C (long-term ZDV, 3NRTI after week-36)	Efavirenz	No	Mother
130	0	=	882572	Baseline	Female	B	6	-1.45	-0.974134	11.5	3/4	CD4 monitoring	Arm B (36 weeks ZDV)	Nevirapine	No	Mother
130	4	=	1558	Viral load response	Female	B	6	-1.45	-0.974134	11.5	3/4	CD4 monitoring	Arm B (36 weeks ZDV)	Nevirapine	No	Mother
130	24	<	80	Viral load response	Female	B	6	-1.45	-0.974134	11.5	3/4	CD4 monitoring	Arm B (36 weeks ZDV)	Nevirapine	No	Mother
130	36	<	80	Viral load response	Female	B	6	-1.45	-0.974134	11.5	3/4	CD4 monitoring	Arm B (36 weeks ZDV)	Nevirapine	No	Mother
130	48	<	80	Viral load response	Female	B	6	-1.45	-0.974134	11.5	3/4	CD4 monitoring	Arm B (36 weeks ZDV)	Nevirapine	No	Mother
130	60	<	80	Viral load response	Female	B	6	-1.45	-0.974134	11.5	3/4	CD4 monitoring	Arm B (36 weeks ZDV)	Nevirapine	No	Mother
130	72	<	80	Viral load response	Female	B	6	-1.45	-0.974134	11.5	3/4	CD4 monitoring	Arm B (36 weeks ZDV)	Nevirapine	No	Mother
130	96	<	80	Viral load response	Female	B	6	-1.45	-0.974134	11.5	3/4	CD4 monitoring	Arm B (36 weeks ZDV)	Nevirapine	No	Mother
130	108	=	552	Current or previous blip	Female	B	6	-1.45	-0.974134	11.5	3/4	CD4 monitoring	Arm B (36 weeks ZDV)	Nevirapine	No	Mother
130	120	<	80	Current or previous blip	Female	B	6	-1.45	-0.974134	11.5	3/4	CD4 monitoring	Arm B (36 weeks ZDV)	Nevirapine	No	Mother
130	144	<	80	Current or previous blip	Female	B	6	-1.45	-0.974134	11.5	3/4	CD4 monitoring	Arm B (36 weeks ZDV)	Nevirapine	No	Mother
130	156	<	80	Current or previous blip	Female	B	6	-1.45	-0.974134	11.5	3/4	CD4 monitoring	Arm B (36 weeks ZDV)	Nevirapine	No	Mother
130	168	<	80	Current or previous blip	Female	B	6	-1.45	-0.974134	11.5	3/4	CD4 monitoring	Arm B (36 weeks ZDV)	Nevirapine	No	Mother
130	192	<	80	Current or previous blip	Female	B	6	-1.45	-0.974134	11.5	3/4	CD4 monitoring	Arm B (36 weeks ZDV)	Nevirapine	No	Mother
131	0	=	257073	Baseline	Male	A	9	-1.635	-1.56804	12.5	3/4	No CD4 monitoring	Arm B (36 weeks ZDV)	Nevirapine	No	Other
131	4	=	2371	Viral load response	Male	A	9	-1.635	-1.56804	12.5	3/4	No CD4 monitoring	Arm B (36 weeks ZDV)	Nevirapine	No	Other
131	24	<	80	Viral load response	Male	A	9	-1.635	-1.56804	12.5	3/4	No CD4 monitoring	Arm B (36 weeks ZDV)	Nevirapine	No	Other
131	36	<	80	Viral load response	Male	A	9	-1.635	-1.56804	12.5	3/4	No CD4 monitoring	Arm B (36 weeks ZDV)	Nevirapine	No	Other
131	48	<	80	Viral load response	Male	A	9	-1.635	-1.56804	12.5	3/4	No CD4 monitoring	Arm B (36 weeks ZDV)	Nevirapine	No	Other
131	72	<	80	Viral load response	Male	A	9	-1.635	-1.56804	12.5	3/4	No CD4 monitoring	Arm B (36 weeks ZDV)	Nevirapine	No	Other
131	96	<	80	Viral load response	Male	A	9	-1.635	-1.56804	12.5	3/4	No CD4 monitoring	Arm B (36 weeks ZDV)	Nevirapine	No	Other
131	120	<	80	Viral load response	Male	A	9	-1.635	-1.56804	12.5	3/4	No CD4 monitoring	Arm B (36 weeks ZDV)	Nevirapine	No	Other
131	144	<	80	Viral load response	Male	A	9	-1.635	-1.56804	12.5	3/4	No CD4 monitoring	Arm B (36 weeks ZDV)	Nevirapine	No	Other
131	168	=	133	Current or previous blip	Male	A	9	-1.635	-1.56804	12.5	3/4	No CD4 monitoring	Arm B (36 weeks ZDV)	Nevirapine	No	Other
131	192	<	80	Current or previous blip	Male	A	9	-1.635	-1.56804	12.5	3/4	No CD4 monitoring	Arm B (36 weeks ZDV)	Nevirapine	No	Other
132	0	=	1360365	Baseline	Female	A	10	-1.58	-1.51196	7.5	3/4	CD4 monitoring	Arm C (long-term ZDV, 3NRTI after week-36)	Nevirapine	No	Other
132	4	=	6231	Viral load response	Female	A	10	-1.58	-1.51196	7.5	3/4	CD4 monitoring	Arm C (long-term ZDV, 3NRTI after week-36)	Nevirapine	No	Other
132	24	=	96	Viral load response	Female	A	10	-1.58	-1.51196	7.5	3/4	CD4 monitoring	Arm C (long-term ZDV, 3NRTI after week-36)	Nevirapine	No	Other
132	36	<	80	Viral load response	Female	A	10	-1.58	-1.51196	7.5	3/4	CD4 monitoring	Arm C (long-term ZDV, 3NRTI after week-36)	Nevirapine	No	Other
132	48	<	80	Viral load response	Female	A	10	-1.58	-1.51196	7.5	3/4	CD4 monitoring	Arm C (long-term ZDV, 3NRTI after week-36)	Nevirapine	No	Other
132	72	=	1440	Current or previous blip	Female	A	10	-1.58	-1.51196	7.5	3/4	CD4 monitoring	Arm C (long-term ZDV, 3NRTI after week-36)	Nevirapine	No	Other
132	96	<	80	Current or previous blip	Female	A	10	-1.58	-1.51196	7.5	3/4	CD4 monitoring	Arm C (long-term ZDV, 3NRTI after week-36)	Nevirapine	No	Other
132	120	<	80	Current or previous blip	Female	A	10	-1.58	-1.51196	7.5	3/4	CD4 monitoring	Arm C (long-term ZDV, 3NRTI after week-36)	Nevirapine	No	Other
132	144	<	80	Current or previous blip	Female	A	10	-1.58	-1.51196	7.5	3/4	CD4 monitoring	Arm C (long-term ZDV, 3NRTI after week-36)	Nevirapine	No	Other
132	168	<	80	Current or previous blip	Female	A	10	-1.58	-1.51196	7.5	3/4	CD4 monitoring	Arm C (long-term ZDV, 3NRTI after week-36)	Nevirapine	No	Other
132	192	=	459	Current or previous blip	Female	A	10	-1.58	-1.51196	7.5	3/4	CD4 monitoring	Arm C (long-term ZDV, 3NRTI after week-36)	Nevirapine	No	Other
133	0	=	44522	Baseline	Male	C	2	-3.28	-1.62392	20.5	1/2	No CD4 monitoring	Arm A (3TC/ABC/NNRTI throughout)	Nevirapine	Yes	Mother
133	24	<	80	Viral load response	Male	C	2	-3.28	-1.62392	20.5	1/2	No CD4 monitoring	Arm A (3TC/ABC/NNRTI throughout)	Nevirapine	Yes	Mother
133	36	<	80	Viral load response	Male	C	2	-3.28	-1.62392	20.5	1/2	No CD4 monitoring	Arm A (3TC/ABC/NNRTI throughout)	Nevirapine	Yes	Mother
133	48	<	80	Viral load response	Male	C	2	-3.28	-1.62392	20.5	1/2	No CD4 monitoring	Arm A (3TC/ABC/NNRTI throughout)	Nevirapine	Yes	Mother
133	72	<	80	Viral load response	Male	C	2	-3.28	-1.62392	20.5	1/2	No CD4 monitoring	Arm A (3TC/ABC/NNRTI throughout)	Nevirapine	Yes	Mother
133	96	=	65616	Current or previous blip	Male	C	2	-3.28	-1.62392	20.5	1/2	No CD4 monitoring	Arm A (3TC/ABC/NNRTI throughout)	Nevirapine	Yes	Mother
133	120	<	80	Current or previous blip	Male	C	2	-3.28	-1.62392	20.5	1/2	No CD4 monitoring	Arm A (3TC/ABC/NNRTI throughout)	Nevirapine	Yes	Mother
133	144	<	80	Current or previous blip	Male	C	2	-3.28	-1.62392	20.5	1/2	No CD4 monitoring	Arm A (3TC/ABC/NNRTI throughout)	Nevirapine	Yes	Mother
133	168	=	80	Current or previous blip	Male	C	2	-3.28	-1.62392	20.5	1/2	No CD4 monitoring	Arm A (3TC/ABC/NNRTI throughout)	Nevirapine	Yes	Mother
133	192	<	80	Current or previous blip	Male	C	2	-3.28	-1.62392	20.5	1/2	No CD4 monitoring	Arm A (3TC/ABC/NNRTI throughout)	Nevirapine	Yes	Mother
133	216	<	80	Current or previous blip	Male	C	2	-3.28	-1.62392	20.5	1/2	No CD4 monitoring	Arm A (3TC/ABC/NNRTI throughout)	Nevirapine	Yes	Mother
134	0	=	591964	Baseline	Female	A	6	-3.23	-2.68044	14	1/2	No CD4 monitoring	Arm B (36 weeks ZDV)	Nevirapine	No	Other
134	4	=	516	Viral load response	Female	A	6	-3.23	-2.68044	14	1/2	No CD4 monitoring	Arm B (36 weeks ZDV)	Nevirapine	No	Other
134	24	<	80	Viral load response	Female	A	6	-3.23	-2.68044	14	1/2	No CD4 monitoring	Arm B (36 weeks ZDV)	Nevirapine	No	Other
134	36	<	80	Viral load response	Female	A	6	-3.23	-2.68044	14	1/2	No CD4 monitoring	Arm B (36 weeks ZDV)	Nevirapine	No	Other
134	48	<	80	Viral load response	Female	A	6	-3.23	-2.68044	14	1/2	No CD4 monitoring	Arm B (36 weeks ZDV)	Nevirapine	No	Other
134	72	<	80	Viral load response	Female	A	6	-3.23	-2.68044	14	1/2	No CD4 monitoring	Arm B (36 weeks ZDV)	Nevirapine	No	Other
134	84	<	80	Viral load response	Female	A	6	-3.23	-2.68044	14	1/2	No CD4 monitoring	Arm B (36 weeks ZDV)	Nevirapine	No	Other
134	96	<	80	Viral load response	Female	A	6	-3.23	-2.68044	14	1/2	No CD4 monitoring	Arm B (36 weeks ZDV)	Nevirapine	No	Other
134	120	<	80	Viral load response	Female	A	6	-3.23	-2.68044	14	1/2	No CD4 monitoring	Arm B (36 weeks ZDV)	Nevirapine	No	Other
134	132	<	80	Viral load response	Female	A	6	-3.23	-2.68044	14	1/2	No CD4 monitoring	Arm B (36 weeks ZDV)	Nevirapine	No	Other
134	144	<	80	Viral load response	Female	A	6	-3.23	-2.68044	14	1/2	No CD4 monitoring	Arm B (36 weeks ZDV)	Nevirapine	No	Other
134	168	<	80	Viral load response	Female	A	6	-3.23	-2.68044	14	1/2	No CD4 monitoring	Arm B (36 weeks ZDV)	Nevirapine	No	Other
134	180	<	80	Viral load response	Female	A	6	-3.23	-2.68044	14	1/2	No CD4 monitoring	Arm B (36 weeks ZDV)	Nevirapine	No	Other
134	192	=	139	Current or previous blip	Female	A	6	-3.23	-2.68044	14	1/2	No CD4 monitoring	Arm B (36 weeks ZDV)	Nevirapine	No	Other
135	0	=	32152	Baseline	Female	B	6	-2.955	-2.48534	26.5	3/4	No CD4 monitoring	Arm A (3TC/ABC/NNRTI throughout)	Nevirapine	No	Other
135	4	=	88	Viral load response	Female	B	6	-2.955	-2.48534	26.5	3/4	No CD4 monitoring	Arm A (3TC/ABC/NNRTI throughout)	Nevirapine	No	Other
135	24	<	80	Viral load response	Female	B	6	-2.955	-2.48534	26.5	3/4	No CD4 monitoring	Arm A (3TC/ABC/NNRTI throughout)	Nevirapine	No	Other
135	36	<	80	Viral load response	Female	B	6	-2.955	-2.48534	26.5	3/4	No CD4 monitoring	Arm A (3TC/ABC/NNRTI throughout)	Nevirapine	No	Other
135	48	<	80	Viral load response	Female	B	6	-2.955	-2.48534	26.5	3/4	No CD4 monitoring	Arm A (3TC/ABC/NNRTI throughout)	Nevirapine	No	Other
135	60	<	80	Viral load response	Female	B	6	-2.955	-2.48534	26.5	3/4	No CD4 monitoring	Arm A (3TC/ABC/NNRTI throughout)	Nevirapine	No	Other
135	72	=	108	Current or previous blip	Female	B	6	-2.955	-2.48534	26.5	3/4	No CD4 monitoring	Arm A (3TC/ABC/NNRTI throughout)	Nevirapine	No	Other
135	96	<	80	Current or previous blip	Female	B	6	-2.955	-2.48534	26.5	3/4	No CD4 monitoring	Arm A (3TC/ABC/NNRTI throughout)	Nevirapine	No	Other
135	108	<	80	Current or previous blip	Female	B	6	-2.955	-2.48534	26.5	3/4	No CD4 monitoring	Arm A (3TC/ABC/NNRTI throughout)	Nevirapine	No	Other
135	120	<	80	Current or previous blip	Female	B	6	-2.955	-2.48534	26.5	3/4	No CD4 monitoring	Arm A (3TC/ABC/NNRTI throughout)	Nevirapine	No	Other
135	144	<	80	Current or previous blip	Female	B	6	-2.955	-2.48534	26.5	3/4	No CD4 monitoring	Arm A (3TC/ABC/NNRTI throughout)	Nevirapine	No	Other
135	156	<	80	Current or previous blip	Female	B	6	-2.955	-2.48534	26.5	3/4	No CD4 monitoring	Arm A (3TC/ABC/NNRTI throughout)	Nevirapine	No	Other
135	168	<	80	Current or previous blip	Female	B	6	-2.955	-2.48534	26.5	3/4	No CD4 monitoring	Arm A (3TC/ABC/NNRTI throughout)	Nevirapine	No	Other
135	192	<	80	Current or previous blip	Female	B	6	-2.955	-2.48534	26.5	3/4	No CD4 monitoring	Arm A (3TC/ABC/NNRTI throughout)	Nevirapine	No	Other
136	0	=	1713421	Baseline	Female	A	0	-2.97	-5.47029	4.5	3/4	CD4 monitoring	Arm A (3TC/ABC/NNRTI throughout)	Nevirapine	No	Mother
136	4	=	13758	Viral load response	Female	A	0	-2.97	-5.47029	4.5	3/4	CD4 monitoring	Arm A (3TC/ABC/NNRTI throughout)	Nevirapine	No	Mother
136	24	<	80	Viral load response	Female	A	0	-2.97	-5.47029	4.5	3/4	CD4 monitoring	Arm A (3TC/ABC/NNRTI throughout)	Nevirapine	No	Mother
136	36	<	80	Viral load response	Female	A	0	-2.97	-5.47029	4.5	3/4	CD4 monitoring	Arm A (3TC/ABC/NNRTI throughout)	Nevirapine	No	Mother
136	48	<	80	Viral load response	Female	A	0	-2.97	-5.47029	4.5	3/4	CD4 monitoring	Arm A (3TC/ABC/NNRTI throughout)	Nevirapine	No	Mother
136	60	<	80	Viral load response	Female	A	0	-2.97	-5.47029	4.5	3/4	CD4 monitoring	Arm A (3TC/ABC/NNRTI throughout)	Nevirapine	No	Mother
136	72	<	80	Viral load response	Female	A	0	-2.97	-5.47029	4.5	3/4	CD4 monitoring	Arm A (3TC/ABC/NNRTI throughout)	Nevirapine	No	Mother
136	108	<	80	Viral load response	Female	A	0	-2.97	-5.47029	4.5	3/4	CD4 monitoring	Arm A (3TC/ABC/NNRTI throughout)	Nevirapine	No	Mother
136	120	<	80	Viral load response	Female	A	0	-2.97	-5.47029	4.5	3/4	CD4 monitoring	Arm A (3TC/ABC/NNRTI throughout)	Nevirapine	No	Mother
136	144	<	80	Viral load response	Female	A	0	-2.97	-5.47029	4.5	3/4	CD4 monitoring	Arm A (3TC/ABC/NNRTI throughout)	Nevirapine	No	Mother
136	156	<	80	Viral load response	Female	A	0	-2.97	-5.47029	4.5	3/4	CD4 monitoring	Arm A (3TC/ABC/NNRTI throughout)	Nevirapine	No	Mother
136	168	=	3571	Current or previous blip	Female	A	0	-2.97	-5.47029	4.5	3/4	CD4 monitoring	Arm A (3TC/ABC/NNRTI throughout)	Nevirapine	No	Mother
136	180	<	80	Current or previous blip	Female	A	0	-2.97	-5.47029	4.5	3/4	CD4 monitoring	Arm A (3TC/ABC/NNRTI throughout)	Nevirapine	No	Mother
137	0	=	189662	Baseline	Female	C	5	-1.305	-0.168174	19	1/2	No CD4 monitoring	Arm B (36 weeks ZDV)	Efavirenz	No	Other
137	4	=	1742	Viral load response	Female	C	5	-1.305	-0.168174	19	1/2	No CD4 monitoring	Arm B (36 weeks ZDV)	Efavirenz	No	Other
137	24	<	80	Viral load response	Female	C	5	-1.305	-0.168174	19	1/2	No CD4 monitoring	Arm B (36 weeks ZDV)	Efavirenz	No	Other
137	36	<	80	Viral load response	Female	C	5	-1.305	-0.168174	19	1/2	No CD4 monitoring	Arm B (36 weeks ZDV)	Efavirenz	No	Other
137	48	<	80	Viral load response	Female	C	5	-1.305	-0.168174	19	1/2	No CD4 monitoring	Arm B (36 weeks ZDV)	Efavirenz	No	Other
137	60	<	80	Viral load response	Female	C	5	-1.305	-0.168174	19	1/2	No CD4 monitoring	Arm B (36 weeks ZDV)	Efavirenz	No	Other
137	72	=	150	Current or previous blip	Female	C	5	-1.305	-0.168174	19	1/2	No CD4 monitoring	Arm B (36 weeks ZDV)	Efavirenz	No	Other
137	96	<	80	Current or previous blip	Female	C	5	-1.305	-0.168174	19	1/2	No CD4 monitoring	Arm B (36 weeks ZDV)	Efavirenz	No	Other
137	108	<	80	Current or previous blip	Female	C	5	-1.305	-0.168174	19	1/2	No CD4 monitoring	Arm B (36 weeks ZDV)	Efavirenz	No	Other
137	120	<	80	Current or previous blip	Female	C	5	-1.305	-0.168174	19	1/2	No CD4 monitoring	Arm B (36 weeks ZDV)	Efavirenz	No	Other
137	144	<	80	Current or previous blip	Female	C	5	-1.305	-0.168174	19	1/2	No CD4 monitoring	Arm B (36 weeks ZDV)	Efavirenz	No	Other
137	156	<	80	Current or previous blip	Female	C	5	-1.305	-0.168174	19	1/2	No CD4 monitoring	Arm B (36 weeks ZDV)	Efavirenz	No	Other
137	168	<	80	Current or previous blip	Female	C	5	-1.305	-0.168174	19	1/2	No CD4 monitoring	Arm B (36 weeks ZDV)	Efavirenz	No	Other
137	192	<	80	Current or previous blip	Female	C	5	-1.305	-0.168174	19	1/2	No CD4 monitoring	Arm B (36 weeks ZDV)	Efavirenz	No	Other
137	204	<	80	Current or previous blip	Female	C	5	-1.305	-0.168174	19	1/2	No CD4 monitoring	Arm B (36 weeks ZDV)	Efavirenz	No	Other
138	0	=	381986	Baseline	Male	D	6	-2.23	-1.75447	11.5	3/4	No CD4 monitoring	Arm A (3TC/ABC/NNRTI throughout)	Efavirenz	No	Other
138	4	=	2480	Viral load response	Male	D	6	-2.23	-1.75447	11.5	3/4	No CD4 monitoring	Arm A (3TC/ABC/NNRTI throughout)	Efavirenz	No	Other
138	24	<	80	Viral load response	Male	D	6	-2.23	-1.75447	11.5	3/4	No CD4 monitoring	Arm A (3TC/ABC/NNRTI throughout)	Efavirenz	No	Other
138	36	<	80	Viral load response	Male	D	6	-2.23	-1.75447	11.5	3/4	No CD4 monitoring	Arm A (3TC/ABC/NNRTI throughout)	Efavirenz	No	Other
138	48	=	124	Current or previous blip	Male	D	6	-2.23	-1.75447	11.5	3/4	No CD4 monitoring	Arm A (3TC/ABC/NNRTI throughout)	Efavirenz	No	Other
138	72	<	80	Current or previous blip	Male	D	6	-2.23	-1.75447	11.5	3/4	No CD4 monitoring	Arm A (3TC/ABC/NNRTI throughout)	Efavirenz	No	Other
138	96	<	80	Current or previous blip	Male	D	6	-2.23	-1.75447	11.5	3/4	No CD4 monitoring	Arm A (3TC/ABC/NNRTI throughout)	Efavirenz	No	Other
138	120	<	80	Current or previous blip	Male	D	6	-2.23	-1.75447	11.5	3/4	No CD4 monitoring	Arm A (3TC/ABC/NNRTI throughout)	Efavirenz	No	Other
138	144	<	80	Current or previous blip	Male	D	6	-2.23	-1.75447	11.5	3/4	No CD4 monitoring	Arm A (3TC/ABC/NNRTI throughout)	Efavirenz	No	Other
138	168	<	80	Current or previous blip	Male	D	6	-2.23	-1.75447	11.5	3/4	No CD4 monitoring	Arm A (3TC/ABC/NNRTI throughout)	Efavirenz	No	Other
138	180	<	80	Current or previous blip	Male	D	6	-2.23	-1.75447	11.5	3/4	No CD4 monitoring	Arm A (3TC/ABC/NNRTI throughout)	Efavirenz	No	Other
139	0	=	337946	Baseline	Male	A	7	-4.86	-5.2297	17	3/4	No CD4 monitoring	Arm A (3TC/ABC/NNRTI throughout)	Efavirenz	No	Mother
139	4	=	329	Viral load response	Male	A	7	-4.86	-5.2297	17	3/4	No CD4 monitoring	Arm A (3TC/ABC/NNRTI throughout)	Efavirenz	No	Mother
139	24	<	80	Viral load response	Male	A	7	-4.86	-5.2297	17	3/4	No CD4 monitoring	Arm A (3TC/ABC/NNRTI throughout)	Efavirenz	No	Mother
139	36	<	80	Viral load response	Male	A	7	-4.86	-5.2297	17	3/4	No CD4 monitoring	Arm A (3TC/ABC/NNRTI throughout)	Efavirenz	No	Mother
139	60	=	95	Current or previous blip	Male	A	7	-4.86	-5.2297	17	3/4	No CD4 monitoring	Arm A (3TC/ABC/NNRTI throughout)	Efavirenz	No	Mother
139	72	<	80	Current or previous blip	Male	A	7	-4.86	-5.2297	17	3/4	No CD4 monitoring	Arm A (3TC/ABC/NNRTI throughout)	Efavirenz	No	Mother
139	96	<	80	Current or previous blip	Male	A	7	-4.86	-5.2297	17	3/4	No CD4 monitoring	Arm A (3TC/ABC/NNRTI throughout)	Efavirenz	No	Mother
139	120	<	80	Current or previous blip	Male	A	7	-4.86	-5.2297	17	3/4	No CD4 monitoring	Arm A (3TC/ABC/NNRTI throughout)	Efavirenz	No	Mother
139	144	=	86	Current or previous blip	Male	A	7	-4.86	-5.2297	17	3/4	No CD4 monitoring	Arm A (3TC/ABC/NNRTI throughout)	Efavirenz	No	Mother
139	168	<	80	Current or previous blip	Male	A	7	-4.86	-5.2297	17	3/4	No CD4 monitoring	Arm A (3TC/ABC/NNRTI throughout)	Efavirenz	No	Mother
139	192	=	1368	Current or previous blip	Male	A	7	-4.86	-5.2297	17	3/4	No CD4 monitoring	Arm A (3TC/ABC/NNRTI throughout)	Efavirenz	No	Mother
140	0	=	18112	Baseline	Male	A	3	-1.85	-0.822526	14.5	3/4	No CD4 monitoring	Arm A (3TC/ABC/NNRTI throughout)	Nevirapine	No	Mother
140	4	=	1698	Viral load response	Male	A	3	-1.85	-0.822526	14.5	3/4	No CD4 monitoring	Arm A (3TC/ABC/NNRTI throughout)	Nevirapine	No	Mother
140	36	<	80	Viral load response	Male	A	3	-1.85	-0.822526	14.5	3/4	No CD4 monitoring	Arm A (3TC/ABC/NNRTI throughout)	Nevirapine	No	Mother
140	48	<	80	Viral load response	Male	A	3	-1.85	-0.822526	14.5	3/4	No CD4 monitoring	Arm A (3TC/ABC/NNRTI throughout)	Nevirapine	No	Mother
140	72	<	80	Viral load response	Male	A	3	-1.85	-0.822526	14.5	3/4	No CD4 monitoring	Arm A (3TC/ABC/NNRTI throughout)	Nevirapine	No	Mother
140	120	<	80	Viral load response	Male	A	3	-1.85	-0.822526	14.5	3/4	No CD4 monitoring	Arm A (3TC/ABC/NNRTI throughout)	Nevirapine	No	Mother
140	144	<	80	Viral load response	Male	A	3	-1.85	-0.822526	14.5	3/4	No CD4 monitoring	Arm A (3TC/ABC/NNRTI throughout)	Nevirapine	No	Mother
140	168	<	80	Viral load response	Male	A	3	-1.85	-0.822526	14.5	3/4	No CD4 monitoring	Arm A (3TC/ABC/NNRTI throughout)	Nevirapine	No	Mother
140	192	=	2317	Current or previous blip	Male	A	3	-1.85	-0.822526	14.5	3/4	No CD4 monitoring	Arm A (3TC/ABC/NNRTI throughout)	Nevirapine	No	Mother
141	0	=	1497680	Baseline	Female	D	7	-3.38	-3.35153	7	1/2	No CD4 monitoring	Arm B (36 weeks ZDV)	Efavirenz	No	Other
141	4	=	2636	Viral load response	Female	D	7	-3.38	-3.35153	7	1/2	No CD4 monitoring	Arm B (36 weeks ZDV)	Efavirenz	No	Other
141	36	<	80	Viral load response	Female	D	7	-3.38	-3.35153	7	1/2	No CD4 monitoring	Arm B (36 weeks ZDV)	Efavirenz	No	Other
141	48	<	80	Viral load response	Female	D	7	-3.38	-3.35153	7	1/2	No CD4 monitoring	Arm B (36 weeks ZDV)	Efavirenz	No	Other
141	72	<	80	Viral load response	Female	D	7	-3.38	-3.35153	7	1/2	No CD4 monitoring	Arm B (36 weeks ZDV)	Efavirenz	No	Other
141	96	=	422	Current or previous blip	Female	D	7	-3.38	-3.35153	7	1/2	No CD4 monitoring	Arm B (36 weeks ZDV)	Efavirenz	No	Other
141	120	<	80	Current or previous blip	Female	D	7	-3.38	-3.35153	7	1/2	No CD4 monitoring	Arm B (36 weeks ZDV)	Efavirenz	No	Other
141	132	<	80	Current or previous blip	Female	D	7	-3.38	-3.35153	7	1/2	No CD4 monitoring	Arm B (36 weeks ZDV)	Efavirenz	No	Other
141	168	<	80	Current or previous blip	Female	D	7	-3.38	-3.35153	7	1/2	No CD4 monitoring	Arm B (36 weeks ZDV)	Efavirenz	No	Other
141	192	<	80	Current or previous blip	Female	D	7	-3.38	-3.35153	7	1/2	No CD4 monitoring	Arm B (36 weeks ZDV)	Efavirenz	No	Other
142	0	=	1603024	Baseline	Female	D	5	-1.15	-1.25724	10.5	1/2	No CD4 monitoring	Arm A (3TC/ABC/NNRTI throughout)	Efavirenz	No	Mother
142	4	=	1012	Viral load response	Female	D	5	-1.15	-1.25724	10.5	1/2	No CD4 monitoring	Arm A (3TC/ABC/NNRTI throughout)	Efavirenz	No	Mother
142	36	<	80	Viral load response	Female	D	5	-1.15	-1.25724	10.5	1/2	No CD4 monitoring	Arm A (3TC/ABC/NNRTI throughout)	Efavirenz	No	Mother
142	48	<	80	Viral load response	Female	D	5	-1.15	-1.25724	10.5	1/2	No CD4 monitoring	Arm A (3TC/ABC/NNRTI throughout)	Efavirenz	No	Mother
142	72	=	178	Current or previous blip	Female	D	5	-1.15	-1.25724	10.5	1/2	No CD4 monitoring	Arm A (3TC/ABC/NNRTI throughout)	Efavirenz	No	Mother
142	96	<	80	Current or previous blip	Female	D	5	-1.15	-1.25724	10.5	1/2	No CD4 monitoring	Arm A (3TC/ABC/NNRTI throughout)	Efavirenz	No	Mother
142	120	<	80	Current or previous blip	Female	D	5	-1.15	-1.25724	10.5	1/2	No CD4 monitoring	Arm A (3TC/ABC/NNRTI throughout)	Efavirenz	No	Mother
142	144	<	80	Current or previous blip	Female	D	5	-1.15	-1.25724	10.5	1/2	No CD4 monitoring	Arm A (3TC/ABC/NNRTI throughout)	Efavirenz	No	Mother
142	168	<	80	Current or previous blip	Female	D	5	-1.15	-1.25724	10.5	1/2	No CD4 monitoring	Arm A (3TC/ABC/NNRTI throughout)	Efavirenz	No	Mother
142	192	<	80	Current or previous blip	Female	D	5	-1.15	-1.25724	10.5	1/2	No CD4 monitoring	Arm A (3TC/ABC/NNRTI throughout)	Efavirenz	No	Mother
143	0	=	61650	Baseline	Male	D	10	-3.3	-2.79315	16	1/2	CD4 monitoring	Arm C (long-term ZDV, 3NRTI after week-36)	Efavirenz	No	Other
143	4	=	280	Viral load response	Male	D	10	-3.3	-2.79315	16	1/2	CD4 monitoring	Arm C (long-term ZDV, 3NRTI after week-36)	Efavirenz	No	Other
143	24	<	80	Viral load response	Male	D	10	-3.3	-2.79315	16	1/2	CD4 monitoring	Arm C (long-term ZDV, 3NRTI after week-36)	Efavirenz	No	Other
143	36	<	80	Viral load response	Male	D	10	-3.3	-2.79315	16	1/2	CD4 monitoring	Arm C (long-term ZDV, 3NRTI after week-36)	Efavirenz	No	Other
143	48	<	80	Viral load response	Male	D	10	-3.3	-2.79315	16	1/2	CD4 monitoring	Arm C (long-term ZDV, 3NRTI after week-36)	Efavirenz	No	Other
143	72	=	88	Current or previous blip	Male	D	10	-3.3	-2.79315	16	1/2	CD4 monitoring	Arm C (long-term ZDV, 3NRTI after week-36)	Efavirenz	No	Other
143	84	<	80	Current or previous blip	Male	D	10	-3.3	-2.79315	16	1/2	CD4 monitoring	Arm C (long-term ZDV, 3NRTI after week-36)	Efavirenz	No	Other
143	96	<	80	Current or previous blip	Male	D	10	-3.3	-2.79315	16	1/2	CD4 monitoring	Arm C (long-term ZDV, 3NRTI after week-36)	Efavirenz	No	Other
143	120	<	80	Current or previous blip	Male	D	10	-3.3	-2.79315	16	1/2	CD4 monitoring	Arm C (long-term ZDV, 3NRTI after week-36)	Efavirenz	No	Other
143	132	<	80	Current or previous blip	Male	D	10	-3.3	-2.79315	16	1/2	CD4 monitoring	Arm C (long-term ZDV, 3NRTI after week-36)	Efavirenz	No	Other
143	144	<	80	Current or previous blip	Male	D	10	-3.3	-2.79315	16	1/2	CD4 monitoring	Arm C (long-term ZDV, 3NRTI after week-36)	Efavirenz	No	Other
143	168	<	80	Current or previous blip	Male	D	10	-3.3	-2.79315	16	1/2	CD4 monitoring	Arm C (long-term ZDV, 3NRTI after week-36)	Efavirenz	No	Other
143	180	<	80	Current or previous blip	Male	D	10	-3.3	-2.79315	16	1/2	CD4 monitoring	Arm C (long-term ZDV, 3NRTI after week-36)	Efavirenz	No	Other
144	0	=	587070	Baseline	Female	A	7	-2.525	-3.46961	3.5	3/4	No CD4 monitoring	Arm B (36 weeks ZDV)	Nevirapine	No	Mother
144	4	=	974	Viral load response	Female	A	7	-2.525	-3.46961	3.5	3/4	No CD4 monitoring	Arm B (36 weeks ZDV)	Nevirapine	No	Mother
144	24	<	80	Viral load response	Female	A	7	-2.525	-3.46961	3.5	3/4	No CD4 monitoring	Arm B (36 weeks ZDV)	Nevirapine	No	Mother
144	36	<	80	Viral load response	Female	A	7	-2.525	-3.46961	3.5	3/4	No CD4 monitoring	Arm B (36 weeks ZDV)	Nevirapine	No	Mother
144	48	<	80	Viral load response	Female	A	7	-2.525	-3.46961	3.5	3/4	No CD4 monitoring	Arm B (36 weeks ZDV)	Nevirapine	No	Mother
144	72	<	80	Viral load response	Female	A	7	-2.525	-3.46961	3.5	3/4	No CD4 monitoring	Arm B (36 weeks ZDV)	Nevirapine	No	Mother
144	108	<	80	Viral load response	Female	A	7	-2.525	-3.46961	3.5	3/4	No CD4 monitoring	Arm B (36 weeks ZDV)	Nevirapine	No	Mother
144	120	<	80	Viral load response	Female	A	7	-2.525	-3.46961	3.5	3/4	No CD4 monitoring	Arm B (36 weeks ZDV)	Nevirapine	No	Mother
144	144	=	2669	Current or previous blip	Female	A	7	-2.525	-3.46961	3.5	3/4	No CD4 monitoring	Arm B (36 weeks ZDV)	Nevirapine	No	Mother
144	168	<	80	Current or previous blip	Female	A	7	-2.525	-3.46961	3.5	3/4	No CD4 monitoring	Arm B (36 weeks ZDV)	Nevirapine	No	Mother
144	192	=	144	Current or previous blip	Female	A	7	-2.525	-3.46961	3.5	3/4	No CD4 monitoring	Arm B (36 weeks ZDV)	Nevirapine	No	Mother
145	0	=	107152	Baseline	Male	C	12	-2.54	-1.78848	14.5	3/4	No CD4 monitoring	Arm B (36 weeks ZDV)	Efavirenz	No	Mother
145	4	=	234	Viral load response	Male	C	12	-2.54	-1.78848	14.5	3/4	No CD4 monitoring	Arm B (36 weeks ZDV)	Efavirenz	No	Mother
145	24	<	80	Viral load response	Male	C	12	-2.54	-1.78848	14.5	3/4	No CD4 monitoring	Arm B (36 weeks ZDV)	Efavirenz	No	Mother
145	36	<	80	Viral load response	Male	C	12	-2.54	-1.78848	14.5	3/4	No CD4 monitoring	Arm B (36 weeks ZDV)	Efavirenz	No	Mother
145	48	<	80	Viral load response	Male	C	12	-2.54	-1.78848	14.5	3/4	No CD4 monitoring	Arm B (36 weeks ZDV)	Efavirenz	No	Mother
145	72	=	84	Current or previous blip	Male	C	12	-2.54	-1.78848	14.5	3/4	No CD4 monitoring	Arm B (36 weeks ZDV)	Efavirenz	No	Mother
145	96	<	80	Current or previous blip	Male	C	12	-2.54	-1.78848	14.5	3/4	No CD4 monitoring	Arm B (36 weeks ZDV)	Efavirenz	No	Mother
145	120	<	80	Current or previous blip	Male	C	12	-2.54	-1.78848	14.5	3/4	No CD4 monitoring	Arm B (36 weeks ZDV)	Efavirenz	No	Mother
145	144	<	80	Current or previous blip	Male	C	12	-2.54	-1.78848	14.5	3/4	No CD4 monitoring	Arm B (36 weeks ZDV)	Efavirenz	No	Mother
145	168	<	80	Current or previous blip	Male	C	12	-2.54	-1.78848	14.5	3/4	No CD4 monitoring	Arm B (36 weeks ZDV)	Efavirenz	No	Mother
145	192	=	7056	Current or previous blip	Male	C	12	-2.54	-1.78848	14.5	3/4	No CD4 monitoring	Arm B (36 weeks ZDV)	Efavirenz	No	Mother
145	216	<	80	Current or previous blip	Male	C	12	-2.54	-1.78848	14.5	3/4	No CD4 monitoring	Arm B (36 weeks ZDV)	Efavirenz	No	Mother
146	0	=	212743	Baseline	Female	A	8	-1.335	0.0576351	25	3/4	CD4 monitoring	Arm A (3TC/ABC/NNRTI throughout)	Efavirenz	No	Mother
146	4	=	192	Viral load response	Female	A	8	-1.335	0.0576351	25	3/4	CD4 monitoring	Arm A (3TC/ABC/NNRTI throughout)	Efavirenz	No	Mother
146	24	<	80	Viral load response	Female	A	8	-1.335	0.0576351	25	3/4	CD4 monitoring	Arm A (3TC/ABC/NNRTI throughout)	Efavirenz	No	Mother
146	36	<	80	Viral load response	Female	A	8	-1.335	0.0576351	25	3/4	CD4 monitoring	Arm A (3TC/ABC/NNRTI throughout)	Efavirenz	No	Mother
146	48	<	80	Viral load response	Female	A	8	-1.335	0.0576351	25	3/4	CD4 monitoring	Arm A (3TC/ABC/NNRTI throughout)	Efavirenz	No	Mother
146	120	<	80	Viral load response	Female	A	8	-1.335	0.0576351	25	3/4	CD4 monitoring	Arm A (3TC/ABC/NNRTI throughout)	Efavirenz	No	Mother
146	144	=	417	Current or previous blip	Female	A	8	-1.335	0.0576351	25	3/4	CD4 monitoring	Arm A (3TC/ABC/NNRTI throughout)	Efavirenz	No	Mother
146	168	<	80	Current or previous blip	Female	A	8	-1.335	0.0576351	25	3/4	CD4 monitoring	Arm A (3TC/ABC/NNRTI throughout)	Efavirenz	No	Mother
146	192	<	80	Current or previous blip	Female	A	8	-1.335	0.0576351	25	3/4	CD4 monitoring	Arm A (3TC/ABC/NNRTI throughout)	Efavirenz	No	Mother
147	0	=	15866	Baseline	Female	C	7	0	-0.91921	20.5	1/2	CD4 monitoring	Arm B (36 weeks ZDV)	Efavirenz	No	Other
147	4	=	348	Viral load response	Female	C	7	0	-0.91921	20.5	1/2	CD4 monitoring	Arm B (36 weeks ZDV)	Efavirenz	No	Other
147	24	<	80	Viral load response	Female	C	7	0	-0.91921	20.5	1/2	CD4 monitoring	Arm B (36 weeks ZDV)	Efavirenz	No	Other
147	36	<	80	Viral load response	Female	C	7	0	-0.91921	20.5	1/2	CD4 monitoring	Arm B (36 weeks ZDV)	Efavirenz	No	Other
147	48	<	80	Viral load response	Female	C	7	0	-0.91921	20.5	1/2	CD4 monitoring	Arm B (36 weeks ZDV)	Efavirenz	No	Other
147	60	=	1836	Current or previous blip	Female	C	7	0	-0.91921	20.5	1/2	CD4 monitoring	Arm B (36 weeks ZDV)	Efavirenz	No	Other
147	72	<	80	Current or previous blip	Female	C	7	0	-0.91921	20.5	1/2	CD4 monitoring	Arm B (36 weeks ZDV)	Efavirenz	No	Other
147	96	<	80	Current or previous blip	Female	C	7	0	-0.91921	20.5	1/2	CD4 monitoring	Arm B (36 weeks ZDV)	Efavirenz	No	Other
147	108	<	80	Current or previous blip	Female	C	7	0	-0.91921	20.5	1/2	CD4 monitoring	Arm B (36 weeks ZDV)	Efavirenz	No	Other
147	120	<	80	Current or previous blip	Female	C	7	0	-0.91921	20.5	1/2	CD4 monitoring	Arm B (36 weeks ZDV)	Efavirenz	No	Other
147	156	<	80	Current or previous blip	Female	C	7	0	-0.91921	20.5	1/2	CD4 monitoring	Arm B (36 weeks ZDV)	Efavirenz	No	Other
147	168	<	80	Current or previous blip	Female	C	7	0	-0.91921	20.5	1/2	CD4 monitoring	Arm B (36 weeks ZDV)	Efavirenz	No	Other
147	192	<	80	Current or previous blip	Female	C	7	0	-0.91921	20.5	1/2	CD4 monitoring	Arm B (36 weeks ZDV)	Efavirenz	No	Other
147	204	<	80	Current or previous blip	Female	C	7	0	-0.91921	20.5	1/2	CD4 monitoring	Arm B (36 weeks ZDV)	Efavirenz	No	Other
148	0	=	4043378	Baseline	Male	D	3	-4.405	-2.03198	6.5	1/2	CD4 monitoring	Arm A (3TC/ABC/NNRTI throughout)	Efavirenz	No	Mother
148	4	=	3298	Viral load response	Male	D	3	-4.405	-2.03198	6.5	1/2	CD4 monitoring	Arm A (3TC/ABC/NNRTI throughout)	Efavirenz	No	Mother
148	24	<	80	Viral load response	Male	D	3	-4.405	-2.03198	6.5	1/2	CD4 monitoring	Arm A (3TC/ABC/NNRTI throughout)	Efavirenz	No	Mother
148	36	<	80	Viral load response	Male	D	3	-4.405	-2.03198	6.5	1/2	CD4 monitoring	Arm A (3TC/ABC/NNRTI throughout)	Efavirenz	No	Mother
148	48	<	80	Viral load response	Male	D	3	-4.405	-2.03198	6.5	1/2	CD4 monitoring	Arm A (3TC/ABC/NNRTI throughout)	Efavirenz	No	Mother
148	72	<	80	Viral load response	Male	D	3	-4.405	-2.03198	6.5	1/2	CD4 monitoring	Arm A (3TC/ABC/NNRTI throughout)	Efavirenz	No	Mother
148	96	<	80	Viral load response	Male	D	3	-4.405	-2.03198	6.5	1/2	CD4 monitoring	Arm A (3TC/ABC/NNRTI throughout)	Efavirenz	No	Mother
148	120	<	80	Viral load response	Male	D	3	-4.405	-2.03198	6.5	1/2	CD4 monitoring	Arm A (3TC/ABC/NNRTI throughout)	Efavirenz	No	Mother
148	144	<	80	Viral load response	Male	D	3	-4.405	-2.03198	6.5	1/2	CD4 monitoring	Arm A (3TC/ABC/NNRTI throughout)	Efavirenz	No	Mother
148	168	=	246	Current or previous blip	Male	D	3	-4.405	-2.03198	6.5	1/2	CD4 monitoring	Arm A (3TC/ABC/NNRTI throughout)	Efavirenz	No	Mother
148	180	<	80	Current or previous blip	Male	D	3	-4.405	-2.03198	6.5	1/2	CD4 monitoring	Arm A (3TC/ABC/NNRTI throughout)	Efavirenz	No	Mother
149	0	=	470356	Baseline	Male	A	1	-2.205	-1.07677	4	3/4	CD4 monitoring	Arm B (36 weeks ZDV)	Nevirapine	No	Mother
149	24	=	112	Viral load response	Male	A	1	-2.205	-1.07677	4	3/4	CD4 monitoring	Arm B (36 weeks ZDV)	Nevirapine	No	Mother
149	36	<	80	Viral load response	Male	A	1	-2.205	-1.07677	4	3/4	CD4 monitoring	Arm B (36 weeks ZDV)	Nevirapine	No	Mother
149	48	<	80	Viral load response	Male	A	1	-2.205	-1.07677	4	3/4	CD4 monitoring	Arm B (36 weeks ZDV)	Nevirapine	No	Mother
149	72	<	80	Viral load response	Male	A	1	-2.205	-1.07677	4	3/4	CD4 monitoring	Arm B (36 weeks ZDV)	Nevirapine	No	Mother
149	96	<	80	Viral load response	Male	A	1	-2.205	-1.07677	4	3/4	CD4 monitoring	Arm B (36 weeks ZDV)	Nevirapine	No	Mother
149	108	<	80	Viral load response	Male	A	1	-2.205	-1.07677	4	3/4	CD4 monitoring	Arm B (36 weeks ZDV)	Nevirapine	No	Mother
149	120	<	80	Viral load response	Male	A	1	-2.205	-1.07677	4	3/4	CD4 monitoring	Arm B (36 weeks ZDV)	Nevirapine	No	Mother
149	144	=	271	Current or previous blip	Male	A	1	-2.205	-1.07677	4	3/4	CD4 monitoring	Arm B (36 weeks ZDV)	Nevirapine	No	Mother
149	168	<	80	Current or previous blip	Male	A	1	-2.205	-1.07677	4	3/4	CD4 monitoring	Arm B (36 weeks ZDV)	Nevirapine	No	Mother
149	192	<	80	Current or previous blip	Male	A	1	-2.205	-1.07677	4	3/4	CD4 monitoring	Arm B (36 weeks ZDV)	Nevirapine	No	Mother
150	0	=	27881	Baseline	Female	A	10	-3.33	-3.54429	1.5	3/4	CD4 monitoring	Arm A (3TC/ABC/NNRTI throughout)	Nevirapine	No	Other
150	4	=	178	Viral load response	Female	A	10	-3.33	-3.54429	1.5	3/4	CD4 monitoring	Arm A (3TC/ABC/NNRTI throughout)	Nevirapine	No	Other
150	24	<	80	Viral load response	Female	A	10	-3.33	-3.54429	1.5	3/4	CD4 monitoring	Arm A (3TC/ABC/NNRTI throughout)	Nevirapine	No	Other
150	36	<	80	Viral load response	Female	A	10	-3.33	-3.54429	1.5	3/4	CD4 monitoring	Arm A (3TC/ABC/NNRTI throughout)	Nevirapine	No	Other
150	48	<	80	Viral load response	Female	A	10	-3.33	-3.54429	1.5	3/4	CD4 monitoring	Arm A (3TC/ABC/NNRTI throughout)	Nevirapine	No	Other
150	72	<	80	Viral load response	Female	A	10	-3.33	-3.54429	1.5	3/4	CD4 monitoring	Arm A (3TC/ABC/NNRTI throughout)	Nevirapine	No	Other
150	96	<	80	Viral load response	Female	A	10	-3.33	-3.54429	1.5	3/4	CD4 monitoring	Arm A (3TC/ABC/NNRTI throughout)	Nevirapine	No	Other
150	108	<	80	Viral load response	Female	A	10	-3.33	-3.54429	1.5	3/4	CD4 monitoring	Arm A (3TC/ABC/NNRTI throughout)	Nevirapine	No	Other
150	144	=	747	Current or previous blip	Female	A	10	-3.33	-3.54429	1.5	3/4	CD4 monitoring	Arm A (3TC/ABC/NNRTI throughout)	Nevirapine	No	Other
150	168	<	80	Current or previous blip	Female	A	10	-3.33	-3.54429	1.5	3/4	CD4 monitoring	Arm A (3TC/ABC/NNRTI throughout)	Nevirapine	No	Other
150	192	=	6467	Current or previous blip	Female	A	10	-3.33	-3.54429	1.5	3/4	CD4 monitoring	Arm A (3TC/ABC/NNRTI throughout)	Nevirapine	No	Other
151	0	=	23734	Baseline	Female	B	2	-1.29	-1.90786	23	3/4	CD4 monitoring	Arm A (3TC/ABC/NNRTI throughout)	Nevirapine	No	Other
151	4	=	476	Viral load response	Female	B	2	-1.29	-1.90786	23	3/4	CD4 monitoring	Arm A (3TC/ABC/NNRTI throughout)	Nevirapine	No	Other
151	24	<	80	Viral load response	Female	B	2	-1.29	-1.90786	23	3/4	CD4 monitoring	Arm A (3TC/ABC/NNRTI throughout)	Nevirapine	No	Other
151	36	<	80	Viral load response	Female	B	2	-1.29	-1.90786	23	3/4	CD4 monitoring	Arm A (3TC/ABC/NNRTI throughout)	Nevirapine	No	Other
151	48	<	80	Viral load response	Female	B	2	-1.29	-1.90786	23	3/4	CD4 monitoring	Arm A (3TC/ABC/NNRTI throughout)	Nevirapine	No	Other
151	60	<	80	Viral load response	Female	B	2	-1.29	-1.90786	23	3/4	CD4 monitoring	Arm A (3TC/ABC/NNRTI throughout)	Nevirapine	No	Other
151	72	<	80	Viral load response	Female	B	2	-1.29	-1.90786	23	3/4	CD4 monitoring	Arm A (3TC/ABC/NNRTI throughout)	Nevirapine	No	Other
151	108	<	80	Viral load response	Female	B	2	-1.29	-1.90786	23	3/4	CD4 monitoring	Arm A (3TC/ABC/NNRTI throughout)	Nevirapine	No	Other
151	120	<	80	Viral load response	Female	B	2	-1.29	-1.90786	23	3/4	CD4 monitoring	Arm A (3TC/ABC/NNRTI throughout)	Nevirapine	No	Other
151	144	<	80	Viral load response	Female	B	2	-1.29	-1.90786	23	3/4	CD4 monitoring	Arm A (3TC/ABC/NNRTI throughout)	Nevirapine	No	Other
151	156	<	80	Viral load response	Female	B	2	-1.29	-1.90786	23	3/4	CD4 monitoring	Arm A (3TC/ABC/NNRTI throughout)	Nevirapine	No	Other
151	168	=	1102	Current or previous blip	Female	B	2	-1.29	-1.90786	23	3/4	CD4 monitoring	Arm A (3TC/ABC/NNRTI throughout)	Nevirapine	No	Other
151	192	<	80	Current or previous blip	Female	B	2	-1.29	-1.90786	23	3/4	CD4 monitoring	Arm A (3TC/ABC/NNRTI throughout)	Nevirapine	No	Other
152	0	=	16704	Baseline	Male	B	3	-1.45	-1.30051	29.5	3/4	CD4 monitoring	Arm B (36 weeks ZDV)	Nevirapine	Yes	Mother
152	4	=	94	Viral load response	Male	B	3	-1.45	-1.30051	29.5	3/4	CD4 monitoring	Arm B (36 weeks ZDV)	Nevirapine	Yes	Mother
152	24	=	116	Viral load response	Male	B	3	-1.45	-1.30051	29.5	3/4	CD4 monitoring	Arm B (36 weeks ZDV)	Nevirapine	Yes	Mother
152	36	<	80	Viral load response	Male	B	3	-1.45	-1.30051	29.5	3/4	CD4 monitoring	Arm B (36 weeks ZDV)	Nevirapine	Yes	Mother
152	48	<	80	Viral load response	Male	B	3	-1.45	-1.30051	29.5	3/4	CD4 monitoring	Arm B (36 weeks ZDV)	Nevirapine	Yes	Mother
152	120	<	80	Viral load response	Male	B	3	-1.45	-1.30051	29.5	3/4	CD4 monitoring	Arm B (36 weeks ZDV)	Nevirapine	Yes	Mother
152	144	=	210	Current or previous blip	Male	B	3	-1.45	-1.30051	29.5	3/4	CD4 monitoring	Arm B (36 weeks ZDV)	Nevirapine	Yes	Mother
152	168	<	80	Current or previous blip	Male	B	3	-1.45	-1.30051	29.5	3/4	CD4 monitoring	Arm B (36 weeks ZDV)	Nevirapine	Yes	Mother
152	180	<	80	Current or previous blip	Male	B	3	-1.45	-1.30051	29.5	3/4	CD4 monitoring	Arm B (36 weeks ZDV)	Nevirapine	Yes	Mother
153	0	=	144658	Baseline	Male	A	6	-2.025	-1.84905	4	3/4	No CD4 monitoring	Arm B (36 weeks ZDV)	Efavirenz	No	Other
153	4	=	100	Viral load response	Male	A	6	-2.025	-1.84905	4	3/4	No CD4 monitoring	Arm B (36 weeks ZDV)	Efavirenz	No	Other
153	24	<	80	Viral load response	Male	A	6	-2.025	-1.84905	4	3/4	No CD4 monitoring	Arm B (36 weeks ZDV)	Efavirenz	No	Other
153	36	<	80	Viral load response	Male	A	6	-2.025	-1.84905	4	3/4	No CD4 monitoring	Arm B (36 weeks ZDV)	Efavirenz	No	Other
153	48	=	116	Current or previous blip	Male	A	6	-2.025	-1.84905	4	3/4	No CD4 monitoring	Arm B (36 weeks ZDV)	Efavirenz	No	Other
153	60	<	80	Current or previous blip	Male	A	6	-2.025	-1.84905	4	3/4	No CD4 monitoring	Arm B (36 weeks ZDV)	Efavirenz	No	Other
153	72	=	3138	Current or previous blip	Male	A	6	-2.025	-1.84905	4	3/4	No CD4 monitoring	Arm B (36 weeks ZDV)	Efavirenz	No	Other
153	96	<	80	Current or previous blip	Male	A	6	-2.025	-1.84905	4	3/4	No CD4 monitoring	Arm B (36 weeks ZDV)	Efavirenz	No	Other
153	108	<	80	Current or previous blip	Male	A	6	-2.025	-1.84905	4	3/4	No CD4 monitoring	Arm B (36 weeks ZDV)	Efavirenz	No	Other
153	120	<	80	Current or previous blip	Male	A	6	-2.025	-1.84905	4	3/4	No CD4 monitoring	Arm B (36 weeks ZDV)	Efavirenz	No	Other
153	144	=	96	Current or previous blip	Male	A	6	-2.025	-1.84905	4	3/4	No CD4 monitoring	Arm B (36 weeks ZDV)	Efavirenz	No	Other
153	156	<	80	Current or previous blip	Male	A	6	-2.025	-1.84905	4	3/4	No CD4 monitoring	Arm B (36 weeks ZDV)	Efavirenz	No	Other
153	168	<	80	Current or previous blip	Male	A	6	-2.025	-1.84905	4	3/4	No CD4 monitoring	Arm B (36 weeks ZDV)	Efavirenz	No	Other
153	180	<	80	Current or previous blip	Male	A	6	-2.025	-1.84905	4	3/4	No CD4 monitoring	Arm B (36 weeks ZDV)	Efavirenz	No	Other
154	0	=	268837	Baseline	Female	A	2	-3.385	-2.16926	18	3/4	CD4 monitoring	Arm B (36 weeks ZDV)	Nevirapine	No	Mother
154	4	=	277	Viral load response	Female	A	2	-3.385	-2.16926	18	3/4	CD4 monitoring	Arm B (36 weeks ZDV)	Nevirapine	No	Mother
154	24	<	80	Viral load response	Female	A	2	-3.385	-2.16926	18	3/4	CD4 monitoring	Arm B (36 weeks ZDV)	Nevirapine	No	Mother
154	36	<	80	Viral load response	Female	A	2	-3.385	-2.16926	18	3/4	CD4 monitoring	Arm B (36 weeks ZDV)	Nevirapine	No	Mother
154	60	<	80	Viral load response	Female	A	2	-3.385	-2.16926	18	3/4	CD4 monitoring	Arm B (36 weeks ZDV)	Nevirapine	No	Mother
154	72	<	80	Viral load response	Female	A	2	-3.385	-2.16926	18	3/4	CD4 monitoring	Arm B (36 weeks ZDV)	Nevirapine	No	Mother
154	96	<	80	Viral load response	Female	A	2	-3.385	-2.16926	18	3/4	CD4 monitoring	Arm B (36 weeks ZDV)	Nevirapine	No	Mother
154	120	=	192	Current or previous blip	Female	A	2	-3.385	-2.16926	18	3/4	CD4 monitoring	Arm B (36 weeks ZDV)	Nevirapine	No	Mother
154	144	<	80	Current or previous blip	Female	A	2	-3.385	-2.16926	18	3/4	CD4 monitoring	Arm B (36 weeks ZDV)	Nevirapine	No	Mother
154	168	<	80	Current or previous blip	Female	A	2	-3.385	-2.16926	18	3/4	CD4 monitoring	Arm B (36 weeks ZDV)	Nevirapine	No	Mother
154	192	=	2217	Current or previous blip	Female	A	2	-3.385	-2.16926	18	3/4	CD4 monitoring	Arm B (36 weeks ZDV)	Nevirapine	No	Mother
155	0	=	60090	Baseline	Male	D	1	-2.375	-1.83342	11	1/2	No CD4 monitoring	Arm C (long-term ZDV, 3NRTI after week-36)	Nevirapine	No	Mother
155	4	=	1886	Viral load response	Male	D	1	-2.375	-1.83342	11	1/2	No CD4 monitoring	Arm C (long-term ZDV, 3NRTI after week-36)	Nevirapine	No	Mother
155	24	<	80	Viral load response	Male	D	1	-2.375	-1.83342	11	1/2	No CD4 monitoring	Arm C (long-term ZDV, 3NRTI after week-36)	Nevirapine	No	Mother
155	36	<	80	Viral load response	Male	D	1	-2.375	-1.83342	11	1/2	No CD4 monitoring	Arm C (long-term ZDV, 3NRTI after week-36)	Nevirapine	No	Mother
155	48	=	112	Current or previous blip	Male	D	1	-2.375	-1.83342	11	1/2	No CD4 monitoring	Arm C (long-term ZDV, 3NRTI after week-36)	Nevirapine	No	Mother
155	72	<	80	Current or previous blip	Male	D	1	-2.375	-1.83342	11	1/2	No CD4 monitoring	Arm C (long-term ZDV, 3NRTI after week-36)	Nevirapine	No	Mother
155	96	<	80	Current or previous blip	Male	D	1	-2.375	-1.83342	11	1/2	No CD4 monitoring	Arm C (long-term ZDV, 3NRTI after week-36)	Nevirapine	No	Mother
155	132	<	80	Current or previous blip	Male	D	1	-2.375	-1.83342	11	1/2	No CD4 monitoring	Arm C (long-term ZDV, 3NRTI after week-36)	Nevirapine	No	Mother
155	144	<	80	Current or previous blip	Male	D	1	-2.375	-1.83342	11	1/2	No CD4 monitoring	Arm C (long-term ZDV, 3NRTI after week-36)	Nevirapine	No	Mother
155	168	<	80	Current or previous blip	Male	D	1	-2.375	-1.83342	11	1/2	No CD4 monitoring	Arm C (long-term ZDV, 3NRTI after week-36)	Nevirapine	No	Mother
155	192	<	80	Current or previous blip	Male	D	1	-2.375	-1.83342	11	1/2	No CD4 monitoring	Arm C (long-term ZDV, 3NRTI after week-36)	Nevirapine	No	Mother
155	192	<	80	Current or previous blip	Male	D	1	-2.375	-1.83342	11	1/2	No CD4 monitoring	Arm C (long-term ZDV, 3NRTI after week-36)	Nevirapine	No	Mother
156	0	=	298974	Baseline	Male	A	1	-3.135	-0.796219	13.5	3/4	No CD4 monitoring	Arm B (36 weeks ZDV)	Nevirapine	Yes	Mother
156	4	=	1890	Viral load response	Male	A	1	-3.135	-0.796219	13.5	3/4	No CD4 monitoring	Arm B (36 weeks ZDV)	Nevirapine	Yes	Mother
156	36	<	80	Viral load response	Male	A	1	-3.135	-0.796219	13.5	3/4	No CD4 monitoring	Arm B (36 weeks ZDV)	Nevirapine	Yes	Mother
156	48	=	94	Current or previous blip	Male	A	1	-3.135	-0.796219	13.5	3/4	No CD4 monitoring	Arm B (36 weeks ZDV)	Nevirapine	Yes	Mother
156	72	<	80	Current or previous blip	Male	A	1	-3.135	-0.796219	13.5	3/4	No CD4 monitoring	Arm B (36 weeks ZDV)	Nevirapine	Yes	Mother
156	108	<	80	Current or previous blip	Male	A	1	-3.135	-0.796219	13.5	3/4	No CD4 monitoring	Arm B (36 weeks ZDV)	Nevirapine	Yes	Mother
156	120	<	80	Current or previous blip	Male	A	1	-3.135	-0.796219	13.5	3/4	No CD4 monitoring	Arm B (36 weeks ZDV)	Nevirapine	Yes	Mother
156	144	=	102	Current or previous blip	Male	A	1	-3.135	-0.796219	13.5	3/4	No CD4 monitoring	Arm B (36 weeks ZDV)	Nevirapine	Yes	Mother
156	168	<	80	Current or previous blip	Male	A	1	-3.135	-0.796219	13.5	3/4	No CD4 monitoring	Arm B (36 weeks ZDV)	Nevirapine	Yes	Mother
156	192	<	80	Current or previous blip	Male	A	1	-3.135	-0.796219	13.5	3/4	No CD4 monitoring	Arm B (36 weeks ZDV)	Nevirapine	Yes	Mother
157	0	=	1313850	Baseline	Male	A	5	-2.895	-1.8917	21.5	3/4	CD4 monitoring	Arm B (36 weeks ZDV)	Efavirenz	No	Other
157	4	=	995	Viral load response	Male	A	5	-2.895	-1.8917	21.5	3/4	CD4 monitoring	Arm B (36 weeks ZDV)	Efavirenz	No	Other
157	36	<	80	Viral load response	Male	A	5	-2.895	-1.8917	21.5	3/4	CD4 monitoring	Arm B (36 weeks ZDV)	Efavirenz	No	Other
157	48	<	80	Viral load response	Male	A	5	-2.895	-1.8917	21.5	3/4	CD4 monitoring	Arm B (36 weeks ZDV)	Efavirenz	No	Other
157	72	<	80	Viral load response	Male	A	5	-2.895	-1.8917	21.5	3/4	CD4 monitoring	Arm B (36 weeks ZDV)	Efavirenz	No	Other
157	96	<	80	Viral load response	Male	A	5	-2.895	-1.8917	21.5	3/4	CD4 monitoring	Arm B (36 weeks ZDV)	Efavirenz	No	Other
157	120	<	80	Viral load response	Male	A	5	-2.895	-1.8917	21.5	3/4	CD4 monitoring	Arm B (36 weeks ZDV)	Efavirenz	No	Other
157	144	=	914	Current or previous blip	Male	A	5	-2.895	-1.8917	21.5	3/4	CD4 monitoring	Arm B (36 weeks ZDV)	Efavirenz	No	Other
157	168	<	80	Current or previous blip	Male	A	5	-2.895	-1.8917	21.5	3/4	CD4 monitoring	Arm B (36 weeks ZDV)	Efavirenz	No	Other
157	192	=	9560	Current or previous blip	Male	A	5	-2.895	-1.8917	21.5	3/4	CD4 monitoring	Arm B (36 weeks ZDV)	Efavirenz	No	Other
158	0	=	294589	Baseline	Male	A	8	-1.37	-1.58553	10	3/4	No CD4 monitoring	Arm B (36 weeks ZDV)	Efavirenz	No	Other
158	4	<	80	Viral load response	Male	A	8	-1.37	-1.58553	10	3/4	No CD4 monitoring	Arm B (36 weeks ZDV)	Efavirenz	No	Other
158	24	<	80	Viral load response	Male	A	8	-1.37	-1.58553	10	3/4	No CD4 monitoring	Arm B (36 weeks ZDV)	Efavirenz	No	Other
158	36	<	80	Viral load response	Male	A	8	-1.37	-1.58553	10	3/4	No CD4 monitoring	Arm B (36 weeks ZDV)	Efavirenz	No	Other
158	48	<	80	Viral load response	Male	A	8	-1.37	-1.58553	10	3/4	No CD4 monitoring	Arm B (36 weeks ZDV)	Efavirenz	No	Other
158	72	=	88	Current or previous blip	Male	A	8	-1.37	-1.58553	10	3/4	No CD4 monitoring	Arm B (36 weeks ZDV)	Efavirenz	No	Other
158	96	<	80	Current or previous blip	Male	A	8	-1.37	-1.58553	10	3/4	No CD4 monitoring	Arm B (36 weeks ZDV)	Efavirenz	No	Other
158	120	<	80	Current or previous blip	Male	A	8	-1.37	-1.58553	10	3/4	No CD4 monitoring	Arm B (36 weeks ZDV)	Efavirenz	No	Other
158	144	<	80	Current or previous blip	Male	A	8	-1.37	-1.58553	10	3/4	No CD4 monitoring	Arm B (36 weeks ZDV)	Efavirenz	No	Other
158	168	<	80	Current or previous blip	Male	A	8	-1.37	-1.58553	10	3/4	No CD4 monitoring	Arm B (36 weeks ZDV)	Efavirenz	No	Other
158	192	<	80	Current or previous blip	Male	A	8	-1.37	-1.58553	10	3/4	No CD4 monitoring	Arm B (36 weeks ZDV)	Efavirenz	No	Other
159	0	=	25760	Baseline	Female	B	10	-2.17	-1.62427	21	3/4	No CD4 monitoring	Arm C (long-term ZDV, 3NRTI after week-36)	Nevirapine	No	Mother
159	4	=	354	Viral load response	Female	B	10	-2.17	-1.62427	21	3/4	No CD4 monitoring	Arm C (long-term ZDV, 3NRTI after week-36)	Nevirapine	No	Mother
159	24	<	80	Viral load response	Female	B	10	-2.17	-1.62427	21	3/4	No CD4 monitoring	Arm C (long-term ZDV, 3NRTI after week-36)	Nevirapine	No	Mother
159	36	<	80	Viral load response	Female	B	10	-2.17	-1.62427	21	3/4	No CD4 monitoring	Arm C (long-term ZDV, 3NRTI after week-36)	Nevirapine	No	Mother
159	48	<	80	Viral load response	Female	B	10	-2.17	-1.62427	21	3/4	No CD4 monitoring	Arm C (long-term ZDV, 3NRTI after week-36)	Nevirapine	No	Mother
159	72	=	92	Current or previous blip	Female	B	10	-2.17	-1.62427	21	3/4	No CD4 monitoring	Arm C (long-term ZDV, 3NRTI after week-36)	Nevirapine	No	Mother
159	96	<	80	Current or previous blip	Female	B	10	-2.17	-1.62427	21	3/4	No CD4 monitoring	Arm C (long-term ZDV, 3NRTI after week-36)	Nevirapine	No	Mother
159	120	=	142	Current or previous blip	Female	B	10	-2.17	-1.62427	21	3/4	No CD4 monitoring	Arm C (long-term ZDV, 3NRTI after week-36)	Nevirapine	No	Mother
159	144	<	80	Current or previous blip	Female	B	10	-2.17	-1.62427	21	3/4	No CD4 monitoring	Arm C (long-term ZDV, 3NRTI after week-36)	Nevirapine	No	Mother
159	168	<	80	Current or previous blip	Female	B	10	-2.17	-1.62427	21	3/4	No CD4 monitoring	Arm C (long-term ZDV, 3NRTI after week-36)	Nevirapine	No	Mother
159	180	<	80	Current or previous blip	Female	B	10	-2.17	-1.62427	21	3/4	No CD4 monitoring	Arm C (long-term ZDV, 3NRTI after week-36)	Nevirapine	No	Mother
160	0	=	244128	Baseline	Male	A	12	-2.11	-1.89808	19.5	1/2	CD4 monitoring	Arm C (long-term ZDV, 3NRTI after week-36)	Nevirapine	No	Other
160	4	=	185	Viral load response	Male	A	12	-2.11	-1.89808	19.5	1/2	CD4 monitoring	Arm C (long-term ZDV, 3NRTI after week-36)	Nevirapine	No	Other
160	24	<	80	Viral load response	Male	A	12	-2.11	-1.89808	19.5	1/2	CD4 monitoring	Arm C (long-term ZDV, 3NRTI after week-36)	Nevirapine	No	Other
160	36	<	80	Viral load response	Male	A	12	-2.11	-1.89808	19.5	1/2	CD4 monitoring	Arm C (long-term ZDV, 3NRTI after week-36)	Nevirapine	No	Other
160	48	<	80	Viral load response	Male	A	12	-2.11	-1.89808	19.5	1/2	CD4 monitoring	Arm C (long-term ZDV, 3NRTI after week-36)	Nevirapine	No	Other
160	96	=	886	Current or previous blip	Male	A	12	-2.11	-1.89808	19.5	1/2	CD4 monitoring	Arm C (long-term ZDV, 3NRTI after week-36)	Nevirapine	No	Other
160	120	<	80	Current or previous blip	Male	A	12	-2.11	-1.89808	19.5	1/2	CD4 monitoring	Arm C (long-term ZDV, 3NRTI after week-36)	Nevirapine	No	Other
160	144	=	402	Current or previous blip	Male	A	12	-2.11	-1.89808	19.5	1/2	CD4 monitoring	Arm C (long-term ZDV, 3NRTI after week-36)	Nevirapine	No	Other
160	168	<	80	Current or previous blip	Male	A	12	-2.11	-1.89808	19.5	1/2	CD4 monitoring	Arm C (long-term ZDV, 3NRTI after week-36)	Nevirapine	No	Other
160	192	<	80	Current or previous blip	Male	A	12	-2.11	-1.89808	19.5	1/2	CD4 monitoring	Arm C (long-term ZDV, 3NRTI after week-36)	Nevirapine	No	Other
161	0	=	20404	Baseline	Female	B	5	-2.635	-1.54259	32	3/4	CD4 monitoring	Arm B (36 weeks ZDV)	Nevirapine	No	Mother
161	4	=	684	Viral load response	Female	B	5	-2.635	-1.54259	32	3/4	CD4 monitoring	Arm B (36 weeks ZDV)	Nevirapine	No	Mother
161	36	<	80	Viral load response	Female	B	5	-2.635	-1.54259	32	3/4	CD4 monitoring	Arm B (36 weeks ZDV)	Nevirapine	No	Mother
161	48	<	80	Viral load response	Female	B	5	-2.635	-1.54259	32	3/4	CD4 monitoring	Arm B (36 weeks ZDV)	Nevirapine	No	Mother
161	60	=	96	Current or previous blip	Female	B	5	-2.635	-1.54259	32	3/4	CD4 monitoring	Arm B (36 weeks ZDV)	Nevirapine	No	Mother
161	72	<	80	Current or previous blip	Female	B	5	-2.635	-1.54259	32	3/4	CD4 monitoring	Arm B (36 weeks ZDV)	Nevirapine	No	Mother
161	96	<	80	Current or previous blip	Female	B	5	-2.635	-1.54259	32	3/4	CD4 monitoring	Arm B (36 weeks ZDV)	Nevirapine	No	Mother
161	108	<	80	Current or previous blip	Female	B	5	-2.635	-1.54259	32	3/4	CD4 monitoring	Arm B (36 weeks ZDV)	Nevirapine	No	Mother
161	120	<	80	Current or previous blip	Female	B	5	-2.635	-1.54259	32	3/4	CD4 monitoring	Arm B (36 weeks ZDV)	Nevirapine	No	Mother
161	156	<	80	Current or previous blip	Female	B	5	-2.635	-1.54259	32	3/4	CD4 monitoring	Arm B (36 weeks ZDV)	Nevirapine	No	Mother
161	168	<	80	Current or previous blip	Female	B	5	-2.635	-1.54259	32	3/4	CD4 monitoring	Arm B (36 weeks ZDV)	Nevirapine	No	Mother
161	192	<	80	Current or previous blip	Female	B	5	-2.635	-1.54259	32	3/4	CD4 monitoring	Arm B (36 weeks ZDV)	Nevirapine	No	Mother
161	204	<	80	Current or previous blip	Female	B	5	-2.635	-1.54259	32	3/4	CD4 monitoring	Arm B (36 weeks ZDV)	Nevirapine	No	Mother
162	0	=	190342	Baseline	Female	A	8	-1.605	-0.823617	17	3/4	CD4 monitoring	Arm A (3TC/ABC/NNRTI throughout)	Nevirapine	No	Other
162	4	=	955	Viral load response	Female	A	8	-1.605	-0.823617	17	3/4	CD4 monitoring	Arm A (3TC/ABC/NNRTI throughout)	Nevirapine	No	Other
162	36	<	80	Viral load response	Female	A	8	-1.605	-0.823617	17	3/4	CD4 monitoring	Arm A (3TC/ABC/NNRTI throughout)	Nevirapine	No	Other
162	48	<	80	Viral load response	Female	A	8	-1.605	-0.823617	17	3/4	CD4 monitoring	Arm A (3TC/ABC/NNRTI throughout)	Nevirapine	No	Other
162	72	<	80	Viral load response	Female	A	8	-1.605	-0.823617	17	3/4	CD4 monitoring	Arm A (3TC/ABC/NNRTI throughout)	Nevirapine	No	Other
162	96	<	80	Viral load response	Female	A	8	-1.605	-0.823617	17	3/4	CD4 monitoring	Arm A (3TC/ABC/NNRTI throughout)	Nevirapine	No	Other
162	120	=	760	Current or previous blip	Female	A	8	-1.605	-0.823617	17	3/4	CD4 monitoring	Arm A (3TC/ABC/NNRTI throughout)	Nevirapine	No	Other
162	144	<	80	Current or previous blip	Female	A	8	-1.605	-0.823617	17	3/4	CD4 monitoring	Arm A (3TC/ABC/NNRTI throughout)	Nevirapine	No	Other
162	168	=	1453	Current or previous blip	Female	A	8	-1.605	-0.823617	17	3/4	CD4 monitoring	Arm A (3TC/ABC/NNRTI throughout)	Nevirapine	No	Other
162	192	<	80	Current or previous blip	Female	A	8	-1.605	-0.823617	17	3/4	CD4 monitoring	Arm A (3TC/ABC/NNRTI throughout)	Nevirapine	No	Other
163	0	=	1238112	Baseline	Male	D	7	-1.87	-1.51642	11	1/2	CD4 monitoring	Arm B (36 weeks ZDV)	Efavirenz	No	Other
163	4	=	2398	Viral load response	Male	D	7	-1.87	-1.51642	11	1/2	CD4 monitoring	Arm B (36 weeks ZDV)	Efavirenz	No	Other
163	24	=	86	Viral load response	Male	D	7	-1.87	-1.51642	11	1/2	CD4 monitoring	Arm B (36 weeks ZDV)	Efavirenz	No	Other
163	36	<	80	Viral load response	Male	D	7	-1.87	-1.51642	11	1/2	CD4 monitoring	Arm B (36 weeks ZDV)	Efavirenz	No	Other
163	48	<	80	Viral load response	Male	D	7	-1.87	-1.51642	11	1/2	CD4 monitoring	Arm B (36 weeks ZDV)	Efavirenz	No	Other
163	72	=	104	Current or previous blip	Male	D	7	-1.87	-1.51642	11	1/2	CD4 monitoring	Arm B (36 weeks ZDV)	Efavirenz	No	Other
163	96	<	80	Current or previous blip	Male	D	7	-1.87	-1.51642	11	1/2	CD4 monitoring	Arm B (36 weeks ZDV)	Efavirenz	No	Other
163	120	<	80	Current or previous blip	Male	D	7	-1.87	-1.51642	11	1/2	CD4 monitoring	Arm B (36 weeks ZDV)	Efavirenz	No	Other
163	144	<	80	Current or previous blip	Male	D	7	-1.87	-1.51642	11	1/2	CD4 monitoring	Arm B (36 weeks ZDV)	Efavirenz	No	Other
163	168	<	80	Current or previous blip	Male	D	7	-1.87	-1.51642	11	1/2	CD4 monitoring	Arm B (36 weeks ZDV)	Efavirenz	No	Other
163	192	<	80	Current or previous blip	Male	D	7	-1.87	-1.51642	11	1/2	CD4 monitoring	Arm B (36 weeks ZDV)	Efavirenz	No	Other
164	0	=	139680	Baseline	Male	D	11	-2.765	-1.61641	20.5	1/2	No CD4 monitoring	Arm B (36 weeks ZDV)	Efavirenz	No	Other
164	24	<	80	Viral load response	Male	D	11	-2.765	-1.61641	20.5	1/2	No CD4 monitoring	Arm B (36 weeks ZDV)	Efavirenz	No	Other
164	36	<	80	Viral load response	Male	D	11	-2.765	-1.61641	20.5	1/2	No CD4 monitoring	Arm B (36 weeks ZDV)	Efavirenz	No	Other
164	48	=	152	Current or previous blip	Male	D	11	-2.765	-1.61641	20.5	1/2	No CD4 monitoring	Arm B (36 weeks ZDV)	Efavirenz	No	Other
164	72	<	80	Current or previous blip	Male	D	11	-2.765	-1.61641	20.5	1/2	No CD4 monitoring	Arm B (36 weeks ZDV)	Efavirenz	No	Other
164	96	=	82	Current or previous blip	Male	D	11	-2.765	-1.61641	20.5	1/2	No CD4 monitoring	Arm B (36 weeks ZDV)	Efavirenz	No	Other
164	120	<	80	Current or previous blip	Male	D	11	-2.765	-1.61641	20.5	1/2	No CD4 monitoring	Arm B (36 weeks ZDV)	Efavirenz	No	Other
164	144	<	80	Current or previous blip	Male	D	11	-2.765	-1.61641	20.5	1/2	No CD4 monitoring	Arm B (36 weeks ZDV)	Efavirenz	No	Other
164	168	<	80	Current or previous blip	Male	D	11	-2.765	-1.61641	20.5	1/2	No CD4 monitoring	Arm B (36 weeks ZDV)	Efavirenz	No	Other
164	192	<	80	Current or previous blip	Male	D	11	-2.765	-1.61641	20.5	1/2	No CD4 monitoring	Arm B (36 weeks ZDV)	Efavirenz	No	Other
165	0	=	614519	Baseline	Male	A	7	-3.125	-2.53679	17	1/2	CD4 monitoring	Arm B (36 weeks ZDV)	Nevirapine	No	Other
165	4	=	1337	Viral load response	Male	A	7	-3.125	-2.53679	17	1/2	CD4 monitoring	Arm B (36 weeks ZDV)	Nevirapine	No	Other
165	36	<	80	Viral load response	Male	A	7	-3.125	-2.53679	17	1/2	CD4 monitoring	Arm B (36 weeks ZDV)	Nevirapine	No	Other
165	48	<	80	Viral load response	Male	A	7	-3.125	-2.53679	17	1/2	CD4 monitoring	Arm B (36 weeks ZDV)	Nevirapine	No	Other
165	72	<	80	Viral load response	Male	A	7	-3.125	-2.53679	17	1/2	CD4 monitoring	Arm B (36 weeks ZDV)	Nevirapine	No	Other
165	84	<	80	Viral load response	Male	A	7	-3.125	-2.53679	17	1/2	CD4 monitoring	Arm B (36 weeks ZDV)	Nevirapine	No	Other
165	96	<	80	Viral load response	Male	A	7	-3.125	-2.53679	17	1/2	CD4 monitoring	Arm B (36 weeks ZDV)	Nevirapine	No	Other
165	120	<	80	Viral load response	Male	A	7	-3.125	-2.53679	17	1/2	CD4 monitoring	Arm B (36 weeks ZDV)	Nevirapine	No	Other
165	132	<	80	Viral load response	Male	A	7	-3.125	-2.53679	17	1/2	CD4 monitoring	Arm B (36 weeks ZDV)	Nevirapine	No	Other
165	144	=	355	Current or previous blip	Male	A	7	-3.125	-2.53679	17	1/2	CD4 monitoring	Arm B (36 weeks ZDV)	Nevirapine	No	Other
165	168	<	80	Current or previous blip	Male	A	7	-3.125	-2.53679	17	1/2	CD4 monitoring	Arm B (36 weeks ZDV)	Nevirapine	No	Other
165	180	<	80	Current or previous blip	Male	A	7	-3.125	-2.53679	17	1/2	CD4 monitoring	Arm B (36 weeks ZDV)	Nevirapine	No	Other
165	192	<	80	Current or previous blip	Male	A	7	-3.125	-2.53679	17	1/2	CD4 monitoring	Arm B (36 weeks ZDV)	Nevirapine	No	Other
166	0	=	704264	Baseline	Male	D	7	-4.375	-5.49934	8	1/2	No CD4 monitoring	Arm B (36 weeks ZDV)	Efavirenz	No	Other
166	4	=	580	Viral load response	Male	D	7	-4.375	-5.49934	8	1/2	No CD4 monitoring	Arm B (36 weeks ZDV)	Efavirenz	No	Other
166	36	<	80	Viral load response	Male	D	7	-4.375	-5.49934	8	1/2	No CD4 monitoring	Arm B (36 weeks ZDV)	Efavirenz	No	Other
166	48	<	80	Viral load response	Male	D	7	-4.375	-5.49934	8	1/2	No CD4 monitoring	Arm B (36 weeks ZDV)	Efavirenz	No	Other
166	60	=	276	Current or previous blip	Male	D	7	-4.375	-5.49934	8	1/2	No CD4 monitoring	Arm B (36 weeks ZDV)	Efavirenz	No	Other
166	72	<	80	Current or previous blip	Male	D	7	-4.375	-5.49934	8	1/2	No CD4 monitoring	Arm B (36 weeks ZDV)	Efavirenz	No	Other
166	96	<	80	Current or previous blip	Male	D	7	-4.375	-5.49934	8	1/2	No CD4 monitoring	Arm B (36 weeks ZDV)	Efavirenz	No	Other
166	108	<	80	Current or previous blip	Male	D	7	-4.375	-5.49934	8	1/2	No CD4 monitoring	Arm B (36 weeks ZDV)	Efavirenz	No	Other
166	120	<	80	Current or previous blip	Male	D	7	-4.375	-5.49934	8	1/2	No CD4 monitoring	Arm B (36 weeks ZDV)	Efavirenz	No	Other
166	144	<	80	Current or previous blip	Male	D	7	-4.375	-5.49934	8	1/2	No CD4 monitoring	Arm B (36 weeks ZDV)	Efavirenz	No	Other
166	156	<	80	Current or previous blip	Male	D	7	-4.375	-5.49934	8	1/2	No CD4 monitoring	Arm B (36 weeks ZDV)	Efavirenz	No	Other
166	168	<	80	Current or previous blip	Male	D	7	-4.375	-5.49934	8	1/2	No CD4 monitoring	Arm B (36 weeks ZDV)	Efavirenz	No	Other
167	0	=	359142	Baseline	Female	A	5	-2.515	-2.62016	20.5	3/4	CD4 monitoring	Arm B (36 weeks ZDV)	Efavirenz	No	Other
167	24	<	80	Viral load response	Female	A	5	-2.515	-2.62016	20.5	3/4	CD4 monitoring	Arm B (36 weeks ZDV)	Efavirenz	No	Other
167	36	<	80	Viral load response	Female	A	5	-2.515	-2.62016	20.5	3/4	CD4 monitoring	Arm B (36 weeks ZDV)	Efavirenz	No	Other
167	48	<	80	Viral load response	Female	A	5	-2.515	-2.62016	20.5	3/4	CD4 monitoring	Arm B (36 weeks ZDV)	Efavirenz	No	Other
167	60	<	80	Viral load response	Female	A	5	-2.515	-2.62016	20.5	3/4	CD4 monitoring	Arm B (36 weeks ZDV)	Efavirenz	No	Other
167	72	<	80	Viral load response	Female	A	5	-2.515	-2.62016	20.5	3/4	CD4 monitoring	Arm B (36 weeks ZDV)	Efavirenz	No	Other
167	96	<	80	Viral load response	Female	A	5	-2.515	-2.62016	20.5	3/4	CD4 monitoring	Arm B (36 weeks ZDV)	Efavirenz	No	Other
167	108	<	80	Viral load response	Female	A	5	-2.515	-2.62016	20.5	3/4	CD4 monitoring	Arm B (36 weeks ZDV)	Efavirenz	No	Other
167	120	<	80	Viral load response	Female	A	5	-2.515	-2.62016	20.5	3/4	CD4 monitoring	Arm B (36 weeks ZDV)	Efavirenz	No	Other
167	144	<	80	Viral load response	Female	A	5	-2.515	-2.62016	20.5	3/4	CD4 monitoring	Arm B (36 weeks ZDV)	Efavirenz	No	Other
167	156	<	80	Viral load response	Female	A	5	-2.515	-2.62016	20.5	3/4	CD4 monitoring	Arm B (36 weeks ZDV)	Efavirenz	No	Other
167	168	<	80	Viral load response	Female	A	5	-2.515	-2.62016	20.5	3/4	CD4 monitoring	Arm B (36 weeks ZDV)	Efavirenz	No	Other
167	180	=	224	Current or previous blip	Female	A	5	-2.515	-2.62016	20.5	3/4	CD4 monitoring	Arm B (36 weeks ZDV)	Efavirenz	No	Other
168	0	=	300245	Baseline	Male	A	5	-1.505	-0.863802	17.5	3/4	CD4 monitoring	Arm C (long-term ZDV, 3NRTI after week-36)	Efavirenz	No	Mother
168	4	=	381	Viral load response	Male	A	5	-1.505	-0.863802	17.5	3/4	CD4 monitoring	Arm C (long-term ZDV, 3NRTI after week-36)	Efavirenz	No	Mother
168	24	<	80	Viral load response	Male	A	5	-1.505	-0.863802	17.5	3/4	CD4 monitoring	Arm C (long-term ZDV, 3NRTI after week-36)	Efavirenz	No	Mother
168	36	<	80	Viral load response	Male	A	5	-1.505	-0.863802	17.5	3/4	CD4 monitoring	Arm C (long-term ZDV, 3NRTI after week-36)	Efavirenz	No	Mother
168	48	<	80	Viral load response	Male	A	5	-1.505	-0.863802	17.5	3/4	CD4 monitoring	Arm C (long-term ZDV, 3NRTI after week-36)	Efavirenz	No	Mother
168	72	<	80	Viral load response	Male	A	5	-1.505	-0.863802	17.5	3/4	CD4 monitoring	Arm C (long-term ZDV, 3NRTI after week-36)	Efavirenz	No	Mother
168	84	<	80	Viral load response	Male	A	5	-1.505	-0.863802	17.5	3/4	CD4 monitoring	Arm C (long-term ZDV, 3NRTI after week-36)	Efavirenz	No	Mother
168	96	<	80	Viral load response	Male	A	5	-1.505	-0.863802	17.5	3/4	CD4 monitoring	Arm C (long-term ZDV, 3NRTI after week-36)	Efavirenz	No	Mother
168	108	<	80	Viral load response	Male	A	5	-1.505	-0.863802	17.5	3/4	CD4 monitoring	Arm C (long-term ZDV, 3NRTI after week-36)	Efavirenz	No	Mother
168	120	<	80	Viral load response	Male	A	5	-1.505	-0.863802	17.5	3/4	CD4 monitoring	Arm C (long-term ZDV, 3NRTI after week-36)	Efavirenz	No	Mother
168	132	<	80	Viral load response	Male	A	5	-1.505	-0.863802	17.5	3/4	CD4 monitoring	Arm C (long-term ZDV, 3NRTI after week-36)	Efavirenz	No	Mother
168	144	=	90	Current or previous blip	Male	A	5	-1.505	-0.863802	17.5	3/4	CD4 monitoring	Arm C (long-term ZDV, 3NRTI after week-36)	Efavirenz	No	Mother
168	168	<	80	Current or previous blip	Male	A	5	-1.505	-0.863802	17.5	3/4	CD4 monitoring	Arm C (long-term ZDV, 3NRTI after week-36)	Efavirenz	No	Mother
168	180	<	80	Current or previous blip	Male	A	5	-1.505	-0.863802	17.5	3/4	CD4 monitoring	Arm C (long-term ZDV, 3NRTI after week-36)	Efavirenz	No	Mother
169	0	=	277987	Baseline	Male	A	8	-2.46	-1.41035	12	3/4	No CD4 monitoring	Arm B (36 weeks ZDV)	Efavirenz	No	Other
169	4	=	114	Viral load response	Male	A	8	-2.46	-1.41035	12	3/4	No CD4 monitoring	Arm B (36 weeks ZDV)	Efavirenz	No	Other
169	24	<	80	Viral load response	Male	A	8	-2.46	-1.41035	12	3/4	No CD4 monitoring	Arm B (36 weeks ZDV)	Efavirenz	No	Other
169	36	<	80	Viral load response	Male	A	8	-2.46	-1.41035	12	3/4	No CD4 monitoring	Arm B (36 weeks ZDV)	Efavirenz	No	Other
169	48	<	80	Viral load response	Male	A	8	-2.46	-1.41035	12	3/4	No CD4 monitoring	Arm B (36 weeks ZDV)	Efavirenz	No	Other
169	72	<	80	Viral load response	Male	A	8	-2.46	-1.41035	12	3/4	No CD4 monitoring	Arm B (36 weeks ZDV)	Efavirenz	No	Other
169	96	=	182	Current or previous blip	Male	A	8	-2.46	-1.41035	12	3/4	No CD4 monitoring	Arm B (36 weeks ZDV)	Efavirenz	No	Other
169	108	<	80	Current or previous blip	Male	A	8	-2.46	-1.41035	12	3/4	No CD4 monitoring	Arm B (36 weeks ZDV)	Efavirenz	No	Other
169	144	<	80	Current or previous blip	Male	A	8	-2.46	-1.41035	12	3/4	No CD4 monitoring	Arm B (36 weeks ZDV)	Efavirenz	No	Other
169	168	<	80	Current or previous blip	Male	A	8	-2.46	-1.41035	12	3/4	No CD4 monitoring	Arm B (36 weeks ZDV)	Efavirenz	No	Other
169	192	=	92	Current or previous blip	Male	A	8	-2.46	-1.41035	12	3/4	No CD4 monitoring	Arm B (36 weeks ZDV)	Efavirenz	No	Other
170	0	=	80540	Baseline	Female	C	15	0.24	-0.912018	18	3/4	No CD4 monitoring	Arm B (36 weeks ZDV)	Efavirenz	No	Mother
170	4	=	290	Viral load response	Female	C	15	0.24	-0.912018	18	3/4	No CD4 monitoring	Arm B (36 weeks ZDV)	Efavirenz	No	Mother
170	12	<	80	Viral load response	Female	C	15	0.24	-0.912018	18	3/4	No CD4 monitoring	Arm B (36 weeks ZDV)	Efavirenz	No	Mother
170	36	<	80	Viral load response	Female	C	15	0.24	-0.912018	18	3/4	No CD4 monitoring	Arm B (36 weeks ZDV)	Efavirenz	No	Mother
170	48	<	80	Viral load response	Female	C	15	0.24	-0.912018	18	3/4	No CD4 monitoring	Arm B (36 weeks ZDV)	Efavirenz	No	Mother
170	72	<	80	Viral load response	Female	C	15	0.24	-0.912018	18	3/4	No CD4 monitoring	Arm B (36 weeks ZDV)	Efavirenz	No	Mother
170	96	=	3362	Current or previous blip	Female	C	15	0.24	-0.912018	18	3/4	No CD4 monitoring	Arm B (36 weeks ZDV)	Efavirenz	No	Mother
170	120	<	80	Current or previous blip	Female	C	15	0.24	-0.912018	18	3/4	No CD4 monitoring	Arm B (36 weeks ZDV)	Efavirenz	No	Mother
170	144	<	80	Current or previous blip	Female	C	15	0.24	-0.912018	18	3/4	No CD4 monitoring	Arm B (36 weeks ZDV)	Efavirenz	No	Mother
170	168	<	80	Current or previous blip	Female	C	15	0.24	-0.912018	18	3/4	No CD4 monitoring	Arm B (36 weeks ZDV)	Efavirenz	No	Mother
170	180	=	2540	Current or previous blip	Female	C	15	0.24	-0.912018	18	3/4	No CD4 monitoring	Arm B (36 weeks ZDV)	Efavirenz	No	Mother
171	0	=	1465835	Baseline	Male	A	1	-3.79	-5.51657	13.5	3/4	No CD4 monitoring	Arm C (long-term ZDV, 3NRTI after week-36)	Nevirapine	Yes	Mother
171	4	=	371	Viral load response	Male	A	1	-3.79	-5.51657	13.5	3/4	No CD4 monitoring	Arm C (long-term ZDV, 3NRTI after week-36)	Nevirapine	Yes	Mother
171	24	=	400	Viral load response	Male	A	1	-3.79	-5.51657	13.5	3/4	No CD4 monitoring	Arm C (long-term ZDV, 3NRTI after week-36)	Nevirapine	Yes	Mother
171	36	<	80	Viral load response	Male	A	1	-3.79	-5.51657	13.5	3/4	No CD4 monitoring	Arm C (long-term ZDV, 3NRTI after week-36)	Nevirapine	Yes	Mother
171	48	<	80	Viral load response	Male	A	1	-3.79	-5.51657	13.5	3/4	No CD4 monitoring	Arm C (long-term ZDV, 3NRTI after week-36)	Nevirapine	Yes	Mother
171	72	=	196	Current or previous blip	Male	A	1	-3.79	-5.51657	13.5	3/4	No CD4 monitoring	Arm C (long-term ZDV, 3NRTI after week-36)	Nevirapine	Yes	Mother
171	96	<	80	Current or previous blip	Male	A	1	-3.79	-5.51657	13.5	3/4	No CD4 monitoring	Arm C (long-term ZDV, 3NRTI after week-36)	Nevirapine	Yes	Mother
171	120	<	80	Current or previous blip	Male	A	1	-3.79	-5.51657	13.5	3/4	No CD4 monitoring	Arm C (long-term ZDV, 3NRTI after week-36)	Nevirapine	Yes	Mother
171	144	<	80	Current or previous blip	Male	A	1	-3.79	-5.51657	13.5	3/4	No CD4 monitoring	Arm C (long-term ZDV, 3NRTI after week-36)	Nevirapine	Yes	Mother
171	168	=	98	Current or previous blip	Male	A	1	-3.79	-5.51657	13.5	3/4	No CD4 monitoring	Arm C (long-term ZDV, 3NRTI after week-36)	Nevirapine	Yes	Mother
171	192	<	80	Current or previous blip	Male	A	1	-3.79	-5.51657	13.5	3/4	No CD4 monitoring	Arm C (long-term ZDV, 3NRTI after week-36)	Nevirapine	Yes	Mother
172	0	=	121100	Baseline	Female	C	9	-3.03	-3.77809	1	1/2	No CD4 monitoring	Arm A (3TC/ABC/NNRTI throughout)	Efavirenz	No	Mother
172	4	=	316	Viral load response	Female	C	9	-3.03	-3.77809	1	1/2	No CD4 monitoring	Arm A (3TC/ABC/NNRTI throughout)	Efavirenz	No	Mother
172	24	<	80	Viral load response	Female	C	9	-3.03	-3.77809	1	1/2	No CD4 monitoring	Arm A (3TC/ABC/NNRTI throughout)	Efavirenz	No	Mother
172	36	<	80	Viral load response	Female	C	9	-3.03	-3.77809	1	1/2	No CD4 monitoring	Arm A (3TC/ABC/NNRTI throughout)	Efavirenz	No	Mother
172	48	=	154	Current or previous blip	Female	C	9	-3.03	-3.77809	1	1/2	No CD4 monitoring	Arm A (3TC/ABC/NNRTI throughout)	Efavirenz	No	Mother
172	60	<	80	Current or previous blip	Female	C	9	-3.03	-3.77809	1	1/2	No CD4 monitoring	Arm A (3TC/ABC/NNRTI throughout)	Efavirenz	No	Mother
172	72	<	80	Current or previous blip	Female	C	9	-3.03	-3.77809	1	1/2	No CD4 monitoring	Arm A (3TC/ABC/NNRTI throughout)	Efavirenz	No	Mother
172	96	<	80	Current or previous blip	Female	C	9	-3.03	-3.77809	1	1/2	No CD4 monitoring	Arm A (3TC/ABC/NNRTI throughout)	Efavirenz	No	Mother
172	108	<	80	Current or previous blip	Female	C	9	-3.03	-3.77809	1	1/2	No CD4 monitoring	Arm A (3TC/ABC/NNRTI throughout)	Efavirenz	No	Mother
172	120	<	80	Current or previous blip	Female	C	9	-3.03	-3.77809	1	1/2	No CD4 monitoring	Arm A (3TC/ABC/NNRTI throughout)	Efavirenz	No	Mother
172	144	=	214	Current or previous blip	Female	C	9	-3.03	-3.77809	1	1/2	No CD4 monitoring	Arm A (3TC/ABC/NNRTI throughout)	Efavirenz	No	Mother
172	156	<	80	Current or previous blip	Female	C	9	-3.03	-3.77809	1	1/2	No CD4 monitoring	Arm A (3TC/ABC/NNRTI throughout)	Efavirenz	No	Mother
172	168	<	80	Current or previous blip	Female	C	9	-3.03	-3.77809	1	1/2	No CD4 monitoring	Arm A (3TC/ABC/NNRTI throughout)	Efavirenz	No	Mother
172	180	<	80	Current or previous blip	Female	C	9	-3.03	-3.77809	1	1/2	No CD4 monitoring	Arm A (3TC/ABC/NNRTI throughout)	Efavirenz	No	Mother
172	204	<	80	Current or previous blip	Female	C	9	-3.03	-3.77809	1	1/2	No CD4 monitoring	Arm A (3TC/ABC/NNRTI throughout)	Efavirenz	No	Mother
173	0	=	808871	Baseline	Female	A	6	-3.415	-2.85338	6.5	3/4	No CD4 monitoring	Arm A (3TC/ABC/NNRTI throughout)	Efavirenz	No	Other
173	24	<	80	Viral load response	Female	A	6	-3.415	-2.85338	6.5	3/4	No CD4 monitoring	Arm A (3TC/ABC/NNRTI throughout)	Efavirenz	No	Other
173	36	<	80	Viral load response	Female	A	6	-3.415	-2.85338	6.5	3/4	No CD4 monitoring	Arm A (3TC/ABC/NNRTI throughout)	Efavirenz	No	Other
173	48	<	80	Viral load response	Female	A	6	-3.415	-2.85338	6.5	3/4	No CD4 monitoring	Arm A (3TC/ABC/NNRTI throughout)	Efavirenz	No	Other
173	72	<	80	Viral load response	Female	A	6	-3.415	-2.85338	6.5	3/4	No CD4 monitoring	Arm A (3TC/ABC/NNRTI throughout)	Efavirenz	No	Other
173	108	<	80	Viral load response	Female	A	6	-3.415	-2.85338	6.5	3/4	No CD4 monitoring	Arm A (3TC/ABC/NNRTI throughout)	Efavirenz	No	Other
173	120	<	80	Viral load response	Female	A	6	-3.415	-2.85338	6.5	3/4	No CD4 monitoring	Arm A (3TC/ABC/NNRTI throughout)	Efavirenz	No	Other
173	144	=	2049	Current or previous blip	Female	A	6	-3.415	-2.85338	6.5	3/4	No CD4 monitoring	Arm A (3TC/ABC/NNRTI throughout)	Efavirenz	No	Other
173	168	<	80	Current or previous blip	Female	A	6	-3.415	-2.85338	6.5	3/4	No CD4 monitoring	Arm A (3TC/ABC/NNRTI throughout)	Efavirenz	No	Other
173	192	<	80	Current or previous blip	Female	A	6	-3.415	-2.85338	6.5	3/4	No CD4 monitoring	Arm A (3TC/ABC/NNRTI throughout)	Efavirenz	No	Other
174	0	=	39580	Baseline	Female	A	6	-1.77	-0.854377	15.8	3/4	CD4 monitoring	Arm A (3TC/ABC/NNRTI throughout)	Efavirenz	No	Other
174	4	<	400	Viral load response	Female	A	6	-1.77	-0.854377	15.8	3/4	CD4 monitoring	Arm A (3TC/ABC/NNRTI throughout)	Efavirenz	No	Other
174	24	<	80	Viral load response	Female	A	6	-1.77	-0.854377	15.8	3/4	CD4 monitoring	Arm A (3TC/ABC/NNRTI throughout)	Efavirenz	No	Other
174	36	<	80	Viral load response	Female	A	6	-1.77	-0.854377	15.8	3/4	CD4 monitoring	Arm A (3TC/ABC/NNRTI throughout)	Efavirenz	No	Other
174	48	<	80	Viral load response	Female	A	6	-1.77	-0.854377	15.8	3/4	CD4 monitoring	Arm A (3TC/ABC/NNRTI throughout)	Efavirenz	No	Other
174	72	<	80	Viral load response	Female	A	6	-1.77	-0.854377	15.8	3/4	CD4 monitoring	Arm A (3TC/ABC/NNRTI throughout)	Efavirenz	No	Other
174	84	<	80	Viral load response	Female	A	6	-1.77	-0.854377	15.8	3/4	CD4 monitoring	Arm A (3TC/ABC/NNRTI throughout)	Efavirenz	No	Other
174	96	=	292	Current or previous blip	Female	A	6	-1.77	-0.854377	15.8	3/4	CD4 monitoring	Arm A (3TC/ABC/NNRTI throughout)	Efavirenz	No	Other
174	108	<	80	Current or previous blip	Female	A	6	-1.77	-0.854377	15.8	3/4	CD4 monitoring	Arm A (3TC/ABC/NNRTI throughout)	Efavirenz	No	Other
174	120	=	110	Current or previous blip	Female	A	6	-1.77	-0.854377	15.8	3/4	CD4 monitoring	Arm A (3TC/ABC/NNRTI throughout)	Efavirenz	No	Other
174	132	<	80	Current or previous blip	Female	A	6	-1.77	-0.854377	15.8	3/4	CD4 monitoring	Arm A (3TC/ABC/NNRTI throughout)	Efavirenz	No	Other
174	144	<	80	Current or previous blip	Female	A	6	-1.77	-0.854377	15.8	3/4	CD4 monitoring	Arm A (3TC/ABC/NNRTI throughout)	Efavirenz	No	Other
174	168	<	80	Current or previous blip	Female	A	6	-1.77	-0.854377	15.8	3/4	CD4 monitoring	Arm A (3TC/ABC/NNRTI throughout)	Efavirenz	No	Other
174	180	<	80	Current or previous blip	Female	A	6	-1.77	-0.854377	15.8	3/4	CD4 monitoring	Arm A (3TC/ABC/NNRTI throughout)	Efavirenz	No	Other
175	0	=	163836	Baseline	Female	B	4	-0.565	-2.22277	33.5	3/4	No CD4 monitoring	Arm C (long-term ZDV, 3NRTI after week-36)	Nevirapine	No	Other
175	4	=	156	Viral load response	Female	B	4	-0.565	-2.22277	33.5	3/4	No CD4 monitoring	Arm C (long-term ZDV, 3NRTI after week-36)	Nevirapine	No	Other
175	24	<	80	Viral load response	Female	B	4	-0.565	-2.22277	33.5	3/4	No CD4 monitoring	Arm C (long-term ZDV, 3NRTI after week-36)	Nevirapine	No	Other
175	36	<	80	Viral load response	Female	B	4	-0.565	-2.22277	33.5	3/4	No CD4 monitoring	Arm C (long-term ZDV, 3NRTI after week-36)	Nevirapine	No	Other
175	48	<	80	Viral load response	Female	B	4	-0.565	-2.22277	33.5	3/4	No CD4 monitoring	Arm C (long-term ZDV, 3NRTI after week-36)	Nevirapine	No	Other
175	72	<	80	Viral load response	Female	B	4	-0.565	-2.22277	33.5	3/4	No CD4 monitoring	Arm C (long-term ZDV, 3NRTI after week-36)	Nevirapine	No	Other
175	96	<	80	Viral load response	Female	B	4	-0.565	-2.22277	33.5	3/4	No CD4 monitoring	Arm C (long-term ZDV, 3NRTI after week-36)	Nevirapine	No	Other
175	132	=	190	Current or previous blip	Female	B	4	-0.565	-2.22277	33.5	3/4	No CD4 monitoring	Arm C (long-term ZDV, 3NRTI after week-36)	Nevirapine	No	Other
176	0	=	182245	Baseline	Female	A	8	-2.865	-1.78005	11	3/4	No CD4 monitoring	Arm B (36 weeks ZDV)	Nevirapine	No	Other
176	4	=	964	Viral load response	Female	A	8	-2.865	-1.78005	11	3/4	No CD4 monitoring	Arm B (36 weeks ZDV)	Nevirapine	No	Other
176	24	<	80	Viral load response	Female	A	8	-2.865	-1.78005	11	3/4	No CD4 monitoring	Arm B (36 weeks ZDV)	Nevirapine	No	Other
176	36	=	322	Viral load response	Female	A	8	-2.865	-1.78005	11	3/4	No CD4 monitoring	Arm B (36 weeks ZDV)	Nevirapine	No	Other
176	48	<	80	Viral load response	Female	A	8	-2.865	-1.78005	11	3/4	No CD4 monitoring	Arm B (36 weeks ZDV)	Nevirapine	No	Other
176	60	<	80	Viral load response	Female	A	8	-2.865	-1.78005	11	3/4	No CD4 monitoring	Arm B (36 weeks ZDV)	Nevirapine	No	Other
176	72	<	80	Viral load response	Female	A	8	-2.865	-1.78005	11	3/4	No CD4 monitoring	Arm B (36 weeks ZDV)	Nevirapine	No	Other
176	96	<	80	Viral load response	Female	A	8	-2.865	-1.78005	11	3/4	No CD4 monitoring	Arm B (36 weeks ZDV)	Nevirapine	No	Other
176	108	<	80	Viral load response	Female	A	8	-2.865	-1.78005	11	3/4	No CD4 monitoring	Arm B (36 weeks ZDV)	Nevirapine	No	Other
176	120	<	80	Viral load response	Female	A	8	-2.865	-1.78005	11	3/4	No CD4 monitoring	Arm B (36 weeks ZDV)	Nevirapine	No	Other
176	144	<	80	Viral load response	Female	A	8	-2.865	-1.78005	11	3/4	No CD4 monitoring	Arm B (36 weeks ZDV)	Nevirapine	No	Other
176	156	<	80	Viral load response	Female	A	8	-2.865	-1.78005	11	3/4	No CD4 monitoring	Arm B (36 weeks ZDV)	Nevirapine	No	Other
176	168	<	80	Viral load response	Female	A	8	-2.865	-1.78005	11	3/4	No CD4 monitoring	Arm B (36 weeks ZDV)	Nevirapine	No	Other
176	192	=	170	Current or previous blip	Female	A	8	-2.865	-1.78005	11	3/4	No CD4 monitoring	Arm B (36 weeks ZDV)	Nevirapine	No	Other
[truncated: 1,553 more rows]
