# Supplementary material for: Virological response and resistance among HIV-infected children receiving long-term antiretroviral therapy without virological monitoring in Uganda and Zimbabwe: Observational analyses within the randomised ARROW trial
Source: PLOS journal article supplement (doi:10.1371/journal.pmed.1002432), 2017-11-14
Supplement: S3 (10.1371/journal.pmed.1002432.s003) [file journal.pmed.1002432.s003]

**S3 Table. VL response, blips, pLLVL and rebound over weeks on ART by CD4 monitoring randomisation in 2NRTI+NNRTI**

|                          | Week 4           | Week 24     | Week 36    | Week 48    | Week 72    | Week 96    | Week 120   | Week 144   | Week 168   | Week 192   | Week 216   |
|--------------------------|------------------|-------------|------------|------------|------------|------------|------------|------------|------------|------------|------------|
| <b>CD4-monitoring</b>    | N=104            | N=104       | N=104      | N=104      | N=104      | N=104      | N=104      | N=104      | N=104      | N=104      | N=104      |
| VL response              | 104 (100.0%)     | 100 (96.2%) | 90 (86.5%) | 84 (80.8%) | 67 (64.4%) | 62 (59.6%) | 54 (51.9%) | 42 (40.4%) | 38 (36.5%) | 35 (33.7%) | 35 (33.7%) |
| Current/previous blip    | 0 (0.0%)         | 0 (0.0%)    | 5 (4.8%)   | 7 (6.7%)   | 19 (18.3%) | 23 (22.1%) | 30 (28.9%) | 41 (39.4%) | 43 (41.3%) | 45 (43.3%) | 45 (43.3%) |
| pLLVL                    | 0 (0.0%)         | 0 (0.0%)    | 4 (3.8%)   | 7 (6.7%)   | 9 (8.7%)   | 10 (9.6%)  | 8 (7.7%)   | 8 (7.7%)   | 9 (8.7%)   | 10 (9.6%)  | 10 (9.6%)  |
| Rebound                  | 0 (0.0%)         | 4 (3.8%)    | 5 (4.8%)   | 6 (5.8%)   | 9 (8.7%)   | 9 (8.7%)   | 12 (11.5%) | 13 (12.5%) | 14 (13.5%) | 14 (13.5%) | 14 (13.5%) |
| <b>no CD4-monitoring</b> | N=100            | N=100       | N=99       | N=99       | N=99       | N=99       | N=99       | N=99       | N=98       | N=98       | N=98       |
| VL response              | 100<br>(100.0%)* | 99 (99.0%)  | 84 (84.8%) | 76 (76.8%) | 60 (60.6%) | 53 (53.5%) | 50 (50.5%) | 44 (44.4%) | 42 (42.9%) | 38 (38.8%) | 38 (38.8%) |
| Current/previous blip    | 0 (0.0%)         | 0 (0.0%)    | 4 (4.0%)   | 11 (11.1%) | 26 (26.3%) | 33 (33.3%) | 35 (35.4%) | 39 (39.4%) | 40 (40.8%) | 44 (44.9%) | 44 (44.9%) |
| pLLVL                    | 0 (0.0%)         | 0 (0.0%)    | 4 (4.0%)   | 4 (4.0%)   | 3 (3.0%)   | 3 (3.0%)   | 2 (2.0%)   | 3 (3.0%)   | 3 (3.1%)   | 3 (3.1%)   | 4 (3.1%)   |
| Rebound                  | 0 (0.0%)         | 1 (1.0%)    | 7 (7.1%)   | 8 (8.1%)   | 10 (10.1%) | 10 (10.1%) | 12 (12.1%) | 13 (13.1%) | 13 (13.3%) | 13 (13.3%) | 13 (13.3%) |
| Exact p                  | P=1.00           | P=0.37      | P=0.92     | P=0.53     | P=0.23     | P=0.10     | P=0.27     | P=0.55     | P=0.38     | P=0.30     | P=0.30     |

Carrying forwards current state where VL missing; carrying backwards, "VL response," where week 4 missing (n = 16)

Note: pLLVL=persistent low level VL. P-values from exact tests.
